1 Honey bee (*Apis mellifera*) larval pheromones regulate gene expression related to foraging task  
2 specialization

3

4 Ma R<sup>1</sup>, Rangel J<sup>2</sup>, Grozinger CM<sup>1</sup>

5

6 <sup>1</sup> Department of Entomology, Center for Pollinator Research, Center for Chemical Ecology,

7 Huck Institutes of the Life Sciences, Pennsylvania State University, University Park, PA

8 <sup>2</sup> Department of Entomology, Texas A&M University, College Station, TX

9

10 Corresponding Author: Rong Ma

11

12 **Abstract**

13 Background: Foraging behavior in honey bees (*Apis mellifera*) is a complex phenotype which is  
14 regulated by physiological state and social signals. How these factors are integrated at the  
15 molecular level to modulate foraging behavior has not been well-characterized. The transition of  
16 worker bees from nursing to foraging behavior is mediated by large-scale changes in brain gene  
17 expression, which are influenced by pheromones produced by the queen and larvae. Larval  
18 pheromones can also stimulate foragers to leave the colony to collect pollen, but the mechanisms  
19 underpinning this rapid behavioral plasticity are unknown. Furthermore, the mechanisms  
20 through which foragers specialize on collecting nectar or pollen, and how larval pheromones  
21 impact these different behavioral states, remains to be determined. Here, we investigated the  
22 patterns of gene expression related to rapid behavioral plasticity and task allocation among  
23 honey bee foragers exposed to two larval pheromones, brood pheromone (BP) and (E)-beta-  
24 ocimene (EBO).

25  
26 Results: We hypothesized that both pheromones would alter expression of genes in the brain  
27 related to foraging and would differentially impact expression of genes in the brains of pollen  
28 compared to nectar foragers. Combining data reduction, clustering, and network analysis  
29 methods, we found that foraging preference (nectar vs. pollen) and pheromone exposure are each  
30 associated with specific brain gene expression profiles. Furthermore, pheromone exposure has a  
31 strong transcriptional effect on genes that are preferentially expressed in nectar foragers.  
32 Representation factor analysis between our study and previous landmark honey bee  
33 transcriptome studies revealed significant overlaps for both pheromone communication and  
34 foraging task specialization.

35  
36 Conclusions: Social signals (i.e. pheromones) may invoke foraging-related genes to upregulate  
37 pollen foraging at both long and short time scales. These results provide new insights into how  
38 social signals integrate with task specialization at the molecular level and highlights the  
39 important role that brain gene expression plays in behavioral plasticity across time scales.  
40

41 **Key words:** animal behavior; behavioral plasticity; communication; differential gene expression;  
42 gene networks; larval pheromone signals; task specialization;

43

## 44 **BACKGROUND**

45 One of the hallmarks of insect sociality is division of labor, whereby group members specialize  
46 on different tasks that are essential to group survival and reproduction [1, 2]. Understanding the  
47 proximate and ultimate mechanisms mediating social behavior, division of labor, and task  
48 specialization, is a major focus of behavioral sociobiology [3–9]. Several studies have clearly  
49 demonstrated that complex animal behaviors, including social interactions, are regulated by  
50 transcriptional, neural, and physiological networks [10–13]. Others have suggested that  
51 behavioral ontogeny is mediated by differential regulation of core, well-conserved transcriptional  
52 or physiological “toolkits” that regulate behavioral modules [4, 14–20]. However, the  
53 mechanisms mediating more rapid shifts in behavior and task specialization have not been  
54 examined as thoroughly [21–23].

55 Like many social insects, honey bee (*Apis mellifera*) workers exhibit a form of age-based  
56 task allocation in which their behavioral repertoires incrementally expand or shift over the course  
57 of an individual’s lifetime [24]. This phenomenon—called age-based polyethism—is regulated  
58 both genetically and environmentally, and provides a tractable system in which to investigate  
59 temporal dimensions of behavioral plasticity [25, 26]. Honey bees spend the first weeks of their  
60 lives performing tasks within the relative safety of the hive, including tending to the needs of  
61 developing larvae (i.e. nursing), before transitioning to increasingly dangerous tasks near the nest  
62 entrance and beyond, including foraging [27]. Once they begin foraging, workers may further  
63 specialize by collecting predominantly one floral resource type, either pollen or nectar [28], and  
64 their proclivity for pollen versus nectar foraging can persist throughout their lives. Bees that  
65 specialize on nectar versus pollen foraging exhibit distinct behavioral, physiological, and  
66 transcriptional traits. For example, upon returning to the colony, nectar foragers regurgitate

67 collected nectar to nestmates waiting to process it, while pollen foragers pack their pollen loads  
68 into honeycomb themselves [29, 30]. Nectar and pollen foragers also differ in neural and sensory  
69 responses to sugar [31] and pheromones [32, 33].

70 Pheromone communication in honey bees plays a key role in behavioral transitions across  
71 time scales [10, 34–37]. Pheromones are typically categorized by the time scale at which they  
72 induce behavioral changes: primer pheromones cause slow, enduring changes in physiology in  
73 receivers, while releaser pheromones cause rapid, ephemeral responses in receivers. Primer  
74 pheromones generate these long-term changes in behavior and physiology by altering patterns in  
75 gene expression, especially in the brain [10, 34–37]. Brood pheromone and queen pheromones,  
76 for example, both delay the behavioral transition from nurses to foragers by altering the  
77 expression of large numbers of genes in worker brains [34, 37]. Releaser pheromones elicit rapid  
78 behavioral changes either by activating or modulating neural circuits, triggering molecular  
79 signaling pathways, or regulating gene expression [35, 38–41]. For example, alarm pheromone in  
80 honey bees elicits aggressive behaviors against intruders by activating the expression of  
81 immediate early genes in the brain [35], while one component of queen pheromone,  
82 homovanillyl alcohol, elicits grooming behavior from workers by binding to an olfactory  
83 receptor in antennae, activating dopamine receptors in the brain, and regulating brain gene  
84 expression [34, 42, 43].

85 Honey bee larval pheromones cause primer and releaser effects that blur the distinction  
86 between these categories, which provides a fascinating opportunity to understand regulation of  
87 behavior across time scales. Two larvae-produced pheromones, brood pheromone (BP) and (E)-  
88 beta-ocimene (EBO), have been shown to elicit rapid increases in foraging within an hour of  
89 exposure, presumably by stimulating foraging behavior in a colony's existing foragers. The

90 effect of brood pheromones on forager behavior seems to be driven by an increase in pollen  
91 foraging specifically [44]. Both pheromones also increase the foraging force of the colony, over  
92 the long-term, by accelerating the transition of bees from performing within-hive roles to  
93 foraging [45–47]. This is a fascinating system because both pheromones regulate the same type  
94 of behavior, but at different temporal scales. How these behavioral transitions across different  
95 temporal scales are related, or how their mechanisms interact, remains to be determined.

96 In this study, we evaluated the transcriptional mechanisms underlying rapid changes in honey  
97 bee foraging behavior, and juxtaposed these rapid changes, triggered by social signals, with more  
98 stable differences in gene expression associated with task specialization. Given that foragers  
99 have similar behavioral responses to BP and EBO [48], we hypothesized that these two  
100 pheromones regulate a common set of foraging genes in the brain (i.e. a foraging “toolkit”).  
101 Because BP and EBO have more pronounced effects on pollen foraging than nectar foraging [44,  
102 46], we further hypothesized that larval pheromones affect gene expression in pollen foragers  
103 more strongly than in nectar foragers. We thus compared the effects of EBO and BP exposure on  
104 foragers previously found to specialize on nectar or pollen to test the following four predictions:  
105 1) foragers specializing on pollen versus nectar foraging exhibit distinct patterns of gene  
106 expression, 2) BP and EBO stimulate the same transcriptional profiles in the brains of forager  
107 bees 3) both larval pheromones have more pronounced effects on gene expression in pollen  
108 foragers than nectar foragers, and 4) changes in the same behavior at different time scales (i.e.,  
109 the transition to and/or stimulation of pollen foraging) utilize similar molecular mechanisms.

110 Combining differential gene expression, clustering, and network analyses, our study presents  
111 several lines of evidence that show that larval pheromones and foraging are associated with  
112 expression profiles of common suites of genes, and that these genes are related to metabolic and

113 fatty acid biosynthesis pathways and integral components of the membrane, including sodium  
114 channels. Our study elucidates the molecular mechanisms underlying task allocation and  
115 highlights the important role that brain gene expression plays in behavioral plasticity across time  
116 scales. It also probes the interface between ephemeral and more consistent changes in behavior  
117 to gain insight into mechanisms that permit behavioral plasticity and complexity across time.

## 118 **RESULTS**

119 *Transcript quantification.* The RNA samples collected in this study were extracted from  
120 mushroom bodies of pollen and nectar foragers exposed to one of three pheromone treatments:  
121 paraffin oil control, brood ester pheromone (BP), or E-beta-ocimene (EBO) (Fig. 1). The number  
122 of RNA-seq reads per sample ranged from 41-94 million, with an average of 65 million reads per  
123 sample. After quality filtering and adapter trimming, an average of 69% of the reads per sample  
124 were pseudoaligned to generate transcript abundance for each annotated transcript in the recently  
125 updated honey bee genome annotation (Amel\_HAv3.1). Overall, 9,179 genes were represented  
126 in the data set, representing 74% of 12,332 annotated honey bee genes.

127  
128 *Differential gene expression.* Differential gene expression analysis was performed to characterize  
129 the effects pheromone treatment, forager-type, and the interaction between pheromone and  
130 forager type. There were 533 differentially expressed genes (DEG) whose expression varied in at  
131 least one contrast ( $FDR < 0.05$ ), including 269 DEG related to pheromone treatment and 326 DEG  
132 related to forager type (Table 1). Additionally, there were 131 DEG that showed a statistically  
133 significant interaction between forager type and pheromone treatment.

134       Of the 269 DEGs related to pheromone treatment, there were 58 DEGs between BP and  
135 control samples, and 152 DEGs between EBO and control samples, indicating that EBO's effect

136 on gene expression was almost three times greater than that of BP. In addition, there were 148  
137 genes that showed differences between BP and EBO samples. Because there were many genes  
138 that were differentially expressed in more than one contrast, we performed hypergeometric tests  
139 to determine whether there were more shared DEGs than those from random expectation among  
140 pheromone treatments, and between pheromone treatments and forager type. There were  
141 significant overlaps between all pairwise comparisons of pheromone treatment, indicating that  
142 BP and EBO regulate expression of a common subset of genes or genetic pathways (Table 2).

143 Pheromone-related DEGs were then compared to DEGs that differed between nectar and  
144 pollen foragers, and there were significant overlaps between foraging-related and pheromone-  
145 related DEGs (Table 3). To further explore these results, we split the foraging-related DEGs into  
146 those that were upregulated in pollen foragers and those upregulated in nectar foragers, and again  
147 looked for overlaps with DEGs from each pheromone treatment. Interestingly, there were  
148 significant overlaps between pheromone-related DEGs and DEGs upregulated in nectar foragers  
149 (Table 4; hypergeometric tests,  $p < 0.01$ ), but not between pheromone-related DEGs and DEGs  
150 upregulated in pollen foragers. In summary, BP and EBO both regulated foraging-related genes,  
151 and this effect was driven primarily by genes upregulated in nectar foragers relative to pollen  
152 foragers.

153 To better understand the function of differentially expressed genes associated with  
154 forager type and pheromone treatment, we performed gene ontology (GO) enrichment analysis  
155 for DEGs associated with pheromone treatment, forager type, and their interaction. DEGs  
156 associated with forager type were significantly enriched for GO terms related to lipid metabolism  
157 and trypsin-like serine proteases ( $FDR < 0.05$ ). DEGs related to pheromone treatment were  
158 enriched for integral components of membrane, fatty acid metabolism, and lipid biosynthesis

159 (FDR < 0.05). Finally, DEGs related to the interaction of pheromone treatment and forager type  
160 were enriched for lipid biosynthesis and metabolism (FDR <0.05).

161 The DEGs associated with either EBO or BP were also analyzed separately. Because  
162 there were few upregulated genes associated with either pheromone, up- and down-regulated  
163 genes for each pheromone were pooled during pathway enrichment analysis; however, it should  
164 be noted that the results for pheromone could potentially be driven by down-regulated genes.  
165 DEGs associated with BP exposure were enriched for lipid biosynthesis and integral components  
166 of the membrane (FDR < 0.05). DEGs associated to EBO exposure were enriched for integral  
167 components of membrane, fatty acid biosynthetic processes, fatty acid metabolism, and pentose  
168 phosphate pathway. There was a significant overlap of 39 genes between BP and EBO exposed  
169 foragers compared to controls (P<0.05), and these DEGs were significantly enriched for  
170 metabolic pathways and fatty acid metabolism (FDR<0.05).

171 *Hierarchical clustering and Principal Components Analysis (PCA).* Hierarchical  
172 clustering analysis and PCA were used to better understand broad patterns across all DEGs.  
173 Based on all variance-stabilized gene expression values of DEGs, hierarchical clustering grouped  
174 samples with identical combinations of pheromone treatment and forager type (Fig. 2)  
175 significantly more often than random expectation based on 10,000 iterations of multiscale  
176 bootstrap resampling (P<0.05; Supplementary Fig. 1). Nectar foragers exposed to either BP or  
177 control pheromone treatments clustered together; however, nectar foragers exposed to EBO  
178 clustered with pollen foragers, suggesting that EBO exposure resulted in gene expression  
179 patterns of nectar foragers that were more similar to those of pollen foragers. This is consistent  
180 with the observation that EBO had a greater effect on gene expression than BP. Pollen foragers  
181 exposed to BP or EBO were more similar to each other than either group was to pollen foragers



182 exposed to control treatments. Genes were also clustered based on the similarity of their  
183 expression, and several large clusters of genes emerged.

184 To better understand the contributions of pheromone treatment and forager type on  
185 patterns of gene expression, we performed PCA on all differentially expressed genes with  
186 samples grouped by treatment. Each principal component (PC) was composed of a linear  
187 combination of many genes. Together, the first two PCs explained 63% of variance in the data,  
188 and the PCs were useful in separating samples by both pheromone treatment and forager type  
189 (Fig. 3). The first PC explained 46 % of variance and separates nectar and pollen foragers,  
190 indicating that the greatest axis of variation in gene regulation related to forager type. This is  
191 consistent with results from the differential gene expression analysis, which showed that there  
192 were more DEGs associated with forager type than with pheromone exposure. Nectar foragers  
193 generally exhibited more negative values in the PC1, while pollen foragers exhibited more  
194 positive values. The second principal component explained 17.0 % of the variance in the DEGs  
195 and began to separate pheromone treatment from each other, although the separation was less  
196 distinct than for forager type. Specifically, PC2 seemed to separate bees exposed to control  
197 pheromone treatment from those exposed to BP, while samples from bees exposed to EBO were  
198 more intermediate. Pollen foragers, especially those exposed to EBO and control treatments,  
199 seemed to have a lower variance than nectar foragers in both principal components.

200 *Overlaps with landmark studies.* To explore the relationship between the results shown  
201 above and those of previous similar studies, we performed representation factor analysis between  
202 our results and landmark honey bee transcriptome studies (Tables 5, 6) [37, 49]. Whitfield et al.  
203 [49] identified DEGs related to foraging ontogeny, while Alaux et al. [37]. identified DEGs  
204 related to long-term exposure to BP (i.e. primer pheromone effects). We found a significant

205 overlap between the foraging-related genes identified in our study and those identified by [49]  
206 (hypergeometric test,  $P < 0.05$ ; Table 6). Thus, genes that were differentially expressed in the  
207 brains of nectar and pollen foragers (our study) overlapped significantly with genes that were  
208 differentially expressed in nurses and foragers [49]. Similarly, we found a significant degree of  
209 overlap (hypergeometric test,  $P < 0.05$ ) between DEGs associated with BP exposure in our study  
210 and BP-related DEGs identified in [37] after 15 days of continuous exposure. Thus, long-term  
211 changes in gene expression associated with impacts of BP exposure on the transition from  
212 nursing to foraging tasks overlap significantly with short-term changes in brain expression  
213 patterns associated with the stimulation of foraging behavior by BP. This ultimately suggests  
214 that behavioral plasticity to utilize common suites of genes at vastly different time scales seems.

215 *Weighted gene co-expression network analysis.* We used WGCNA to construct networks  
216 of genes based solely on the similarity of their expression patterns to organize co-expressed  
217 genes into groups, called modules. These modules were constructed independently of trait  
218 information and were then correlated to traits using a generalized linear model. Specifically, we  
219 looked at relationships between each module and three traits of interest: pollen vs. nectar  
220 foraging, BP vs. control, and EBO vs. control. In this way, the WGCNA identified 16 modules  
221 that were significantly correlated to forager type, exposure to BP, exposure to EBO, or a  
222 combination thereof (GLM,  $P < 0.05$ ; Fig. 4). Fourteen modules were significantly correlated with  
223 only one trait. Module 10 was the only module that was associated with all traits, while Module  
224 light cyan was associated with forager type and EBO exposure, but not BP exposure. For each  
225 module, the most highly connected gene in the network was identified (Table 7), providing a list  
226 of candidate genes. The top five most connected genes for each module can be found in the  
227 Supplementary Materials.

228 To better understand the functions of the gene modules identified in this analysis, we  
229 performed KEGG (Kyoto Encyclopedia of Genes and Genomes) pathway analysis on three  
230 modules (Table 8). Module 10 was chosen based on its significant correlation with food and both  
231 brood pheromones, and modules 3 and 7 were selected based on their strong correlations with BP  
232 and EBO, respectively. Module 10 was enriched for KEGG pathways related to metabolic  
233 pathways, carbon metabolism, fatty acid metabolism, and peroxisomes (Wilcoxon,  $P < 0.05$ ).  
234 Module 7 was significantly enriched for glycerophospholipid metabolism, neuroactive ligand-  
235 receptor interaction, and hippo signaling pathway (Wilcoxon,  $P < 0.05$ ). Module 3 was enriched  
236 for metabolic pathways like FoxO and AGE-RAGE signaling pathways, development pathways  
237 like wnt signaling, and immune pathways like Toll and lmd signaling pathways (Wilcoxon,  
238  $P < 0.05$ ).

## 239 **DISCUSSION**

240 In the present study, we investigated the genes and transcriptional pathways underlying  
241 rapid behavioral responses to pheromone signals in honey bee foragers specializing on pollen or  
242 nectar foraging. We hypothesized that two larval pheromones, brood pheromone (BP) and E-  
243 beta-ocimene (EBO), would regulate a common set of foraging genes in the brain, and that they  
244 would affect gene expression more strongly in pollen foragers than nectar foragers. We found  
245 that nectar and pollen foragers have distinguishable gene expression profiles, and that both larval  
246 pheromones do indeed regulate a shared set of genes and transcriptional pathways; however,  
247 these transcriptional pathways more strongly affect nectar foragers than pollen foragers.  
248 Moreover, comparisons with previous studies suggest that similar genes regulate the ontogeny of  
249 foraging behavior and foraging task specialization, and a common set of genes mediates both  
250 short- and long-term responses to BP. Thus, our study identified mechanistic links between

251 larval pheromone communication and foraging specialization and suggests that common  
252 transcriptional pathways may regulate behavior across time scales.

253 Pheromone signals can cause various changes in the receiver's behavior depending on the  
254 behavioral and physiological state of the individual, sometimes with consequences for survival  
255 and reproduction [50, 51]. Honey bee larval pheromones are particularly interesting because they  
256 trigger similar behavioral changes on two timescales: long-term behavioral transition from  
257 nursing to foraging and short-term upregulation of pollen foraging behavior. Previous studies  
258 have examined the genetic and behavioral differences associated with preference for nectar  
259 versus pollen foraging [28, 52–55]. Furthermore, larval pheromones elicit specific response in  
260 pollen foragers. For example, exposure to brood pheromone (BP) increased colony-level pollen  
261 foraging 2.5 fold [44], as well as the ratio of pollen to non-pollen foragers [45], and the  
262 individual effort of pollen foragers [45]. However, previous to this study, there were no  
263 documented impacts of exposure to brood pheromones on nectar foraging.

264 The present study demonstrates for the first time that there are also transcriptional  
265 differences between nectar and pollen foragers in the mushroom bodies of honey bees. Several  
266 quantitative trait loci have been identified which underlie colony-level variation in the propensity  
267 to collect pollen versus nectar, and these loci are associated with variation in concentration of  
268 nectar collected and the amount of pollen and nectar brought back to the hive [54, 56]. In our  
269 study, foraging specialization on nectar versus pollen foraging was associated with substantial  
270 differences in gene expression profiles (with almost 400 DEGs; Table 1), and with variation  
271 among nectar and pollen foragers, which accounted for 46% percent of the overall variation in  
272 DEGs (Fig. 3). To elucidate transcriptional pathways that respond to larval pheromones, we  
273 utilized weighted gene correlation network analysis (WGNCA) to provide a more detailed view

274 of molecular processes associated with traits of interest [57, 58]. WGNCA identified 16 genetic  
275 modules that were significantly correlated with foraging or pheromone exposure (Fig. 4), most of  
276 which were associated with foraging specialization (Fig. 4).

277         Short exposure to both BP and EBO significantly altered gene expression profiles in the  
278 brains of foragers, and both pheromones regulated overlapping sets of genes. Exposure to EBO  
279 was associated with 169 DEGs, which was nearly three times greater than the number of DEGs  
280 regulated by BP (Table 1). Yet, even in this limited gene set, there was a statistically significant  
281 overlap in the DEGs regulated by BP and EBO (Table 2), and the overlapping genes were  
282 enriched for fatty acid metabolism. Hierarchical clustering and principal component analyses  
283 confirmed that pheromone exposure had strong and consistent effects on gene expression  
284 profiles. Furthermore, WGCNA revealed that module 10, representing 239 genes with correlated  
285 expression patterns, was significantly downregulated in samples exposed to either pheromone.  
286 Together, these results suggest that BP and EBO regulate overlapping genetic modules and  
287 pathways that are enriched for energy metabolism. Decreasing whole-brain energy metabolism,  
288 including that of fatty-acids, is associated with long-term behavioral transition from in-hive tasks  
289 to foraging tasks, suggesting that larval pheromones regulate foraging behavior by specifically  
290 activating pathways involved the natural ontogeny for foraging behavior [59].

291         Our data supported our hypothesis that exposure to larval pheromones alters expression  
292 of foraging related genes, but contrary to our predictions, the pheromones had more pronounced  
293 effects on gene expression in nectar foragers than pollen foragers. There was a common set of  
294 DEGs that were associated with both pheromone treatment and foraging specialization (Table 3),  
295 which was driven primarily by DEGs in nectar foragers but not pollen foragers (Table 4).  
296 Hierarchical clustering analysis show that, for the most part, samples were clustered into pollen

297 and nectar foraging “branches,” with the intriguing exception that nectar foragers exposed to  
298 EBO had expression profiles that were more like those of pollen foragers (Table 4). Similarly,  
299 principal components analysis show that nectar foragers exposed to EBO cluster more closely  
300 with pollen foragers than other nectar foragers (Fig 3). The gene network analysis revealed that  
301 two modules were associated with both pheromone treatment and foraging, one of which was  
302 enriched for membrane components and energy metabolism (Table 8). These results suggest that  
303 one mechanism by which larval pheromones modulate colony-level pollen foraging behavior is  
304 by downregulating metabolic pathways in the brains of nectar foragers, which is consistent with  
305 the role that energy metabolism plays in the ontogeny of foraging behavior [59]. Pankiw et al.  
306 [44] found that short exposure to BP increased pollen foraging, but did not observe task-  
307 switching of nectar foragers to pollen foraging, which the authors found puzzling. Our results  
308 indicate that one explanation may be that even after short exposures to larval pheromones, nectar  
309 foragers may be primed to switch to pollen foraging even before they actually make the  
310 behavioral transition, which may be a way to buffer against ephemeral swings in the nutritional  
311 demands of developing larvae.

312 Changes in the same behavior at different time scales, such as ontogeny of pollen  
313 foraging and pheromonal upregulation of pollen foraging, may utilize similar molecular  
314 mechanisms. We reached this intriguing conclusion after comparing our results to those of two  
315 landmark honey bee transcriptome studies [37, 49]. Whitfield et al. [49] compared nurses and  
316 foragers, controlling for age, and found over 1,000 DEGs. Alaux et al. [37] was the first to study  
317 the effects of brood pheromone on gene expression, and found more than 200 DEGs between  
318 age-matched bees that were exposed to BP continuously for multiple days (i.e., 5 or 15 days) and  
319 those that were not exposed. To test the degree of overlap between our results and those from

320 previous studies, we compared 1) the number of DEG between nectar and pollen foragers in our  
321 study with those identified by Whitfield et al. [62], and 2) the DEGs between pheromone  
322 treatments in our study with those identified by Alaux et al. [37]. We found significant overlaps  
323 between DEGs identified in the present study and those of Whitfield et al. ( $P < 0.001$ ) and of  
324 Alaux et al. ( $P < 0.001$ ). The significant overlap between our study and the two microarray  
325 studies, which validate the expression patterns related to foraging specialization and brood  
326 pheromone exposure, suggests that foraging-related gene expression shows a degree of  
327 consistency across time scales (see [58]), and supports the idea that pheromones regulate the  
328 transcriptional pathways underlying foraging specialization.

329         The results of our study lay the groundwork for several intriguing lines of inquiry for  
330 future studies. First, exposing foragers to a short pulse of BP, which stimulates immediate  
331 foraging, regulates a similar set of genes as bees as exposing nurses to BP for 5 days, which  
332 modulates the transition from in-hive tasks to foraging. BP potentially regulates foraging  
333 behavior, at least in part, by priming their to receptivity to foraging-related or social stimuli, even  
334 before nurse bees have made the physiological transition to foraging tasks. This could  
335 conceivably involve genes implicated in both foraging and division of labor (e.g., *Malvolio*, a  
336 manganese transporter) [60], or neurochemical regulatory pathways involving octopomine,  
337 which has shown to modulate responsiveness to both foraging-stimuli and to BP [61, 62].  
338 Furthermore, our results suggest the hypothesis that social pheromones upregulate pollen  
339 foraging by decreasing the expression of nectar foraging genes in the brain, and this would also  
340 be productive line of inquiry for future studies. Lastly, our data suggest that rapid changes in  
341 brain gene expression in nectar foragers may happen prior to task-switching to buffer against  
342 ephemeral environmental conditions. Short-term exposure to larval pheromones may “prime”

343 nectar foragers to switch preferences to pollen foraging, and this switch could occur under  
344 conditions of prolonged exposure to brood pheromone. Thus, our study provides a framework for  
345 hypothesis-driven experiments examining the impacts of pheromone exposure on task  
346 specialization and division of labor.

347 DEGs and WGCNA modules related to both pheromone treatment and foraging  
348 specialization were enriched for several metabolic pathways, including fatty-acid metabolism,  
349 which suggests that metabolic processes and lipid signaling in integration centers of the honey  
350 bee brain may play a role in behavioral plasticity. The transition from nursing to foraging  
351 involves large-scale changes in metabolic pathways, including reductions in lipid stores and  
352 changes in insulin signaling [63]. These physiological changes during the transition from in-hive  
353 tasks to foraging are associated with changes in energy metabolism (including insulin signaling),  
354 gustatory response, and foraging preferences for nectar vs pollen [64, 65] . Therefore, the  
355 prominence of energy metabolism, lipid signaling pathways, and related metabolic pathways in  
356 our brain transcriptome data supports the idea that these pathways in the brain play a role in  
357 insect behavior [66, 67]. Other studies have demonstrated the importance of brain metabolic  
358 processes on influencing individual variation in behavior, particularly aggression [67–69] . The  
359 enrichment of metabolic pathways in DEGs and the prominence of FOXO signaling pathway in  
360 our gene co-expression networks further supports the role of insulin signaling pathways in  
361 mediating neuronal function and behavior in insects [66, 67]. For example, an insulin binding  
362 protein, *Queen brain-selective protein-1 (Qbp-1)*, was differentially expressed in response to  
363 pheromone treatment and is related to FOXO signaling. Module 3 was enriched for FOXO  
364 signaling and significantly correlated with EBO treatment, so its hub genes may serve as useful



365 candidate genes for subsequent studies investigating the impact of insulin signaling on  
366 pheromone communication and foraging.

## 367 **Conclusions**

368 The neural circuits and molecular pathways underlying behavioral plasticity and task  
369 specialization are complex, and our study demonstrates that foraging behavior is regulated in part  
370 by common suites of genes across time scales, from long-term behavioral plasticity (nurse to  
371 forager) to individual variation in task specialization (pollen vs nectar). Our study further  
372 confirms that pheromone communication has a profound effect on gene expression within hours  
373 of exposure, and more importantly, that social signals (i.e. pheromones) may invoke foraging-  
374 related transcriptional pathways to upregulate pollen foraging at both long and short-time time  
375 scales. Moreover, there is clear interaction between individual variation in task specialization and  
376 responses to social signals (i.e. pheromones), and these social signals seem to be manipulating  
377 brain energy metabolism to elicit foraging behavior. Because the mechanisms underlying  
378 foraging behavior are deeply conserved in animals, a detailed mechanistic understanding of the  
379 foraging in honey bees may provide insights into mechanisms involved in division of labor in  
380 insect societies, foraging preference in animals, and complex behavioral phenotypes in general.

## 381 **METHODS**

### 382 **Animals and Experimental Design**

383 We created single-cohort colonies (using same-aged workers) from a common source colony  
384 with a naturally mated queen to avoid differences in behavior and gene expression due to  
385 variation in age and genetic background; thus, all bees used in the study were half-sisters.  
386 Because workers performing any given task in a natural colony can vary widely in age, we  
387 constructed single cohort colonies using workers that emerged as adults within a 48-hr period,

388 minimizing differences in age and experience among individuals. After one week, some of the  
389 bees in single-cohort colonies transition quickly to foraging (Robinson et al. 1989).

390 Three such colonies—each provided with an identical starting population (1,000 bees),  
391 honey and pollen resources—were placed in a large outdoor enclosure (approximately 20' x  
392 50'ft) at the Texas A & M University Riverside Campus. Each colony was provided with two  
393 frames: one frame laden with pollen and honey stores, and one empty frame. In addition to  
394 frames full of honey and pollen inside the colony, feeders full of 50% (w/v) sucrose solution and  
395 fresh pollen (collected from pollen traps on unrelated honey bee colonies) were placed in front of  
396 each colony daily, and bees that foraged on each resource were given different color dots of  
397 enamel paint (Testors, Rockford, IL) on the thorax based on their preference for pollen or nectar  
398 feeders. Only bees with multiple paint marks of a single color were used in this study because  
399 multiple same-color marks demonstrated consistent preference for pollen or nectar, respectively.  
400 Each colony was also provided a strip of queen pheromone (PseudoQueen, Contech Industries,  
401 Victoria, BC, Canada) to prevent colonies from developing a “queenless” physiological state and  
402 to control for the variation in queen quality that would inherently occur when using live queens.  
403 Colonies did not receive any frames containing brood. Although broodless colonies are not the  
404 default state of a colony, it is nevertheless a natural occurrence when queens die for any number  
405 of reasons [52]. The absence of brood controlled for the natural variation in brood pheromones  
406 that may have occurred with the presence of real brood, and minimized the amount of  
407 beekeeping interference necessary to maintain identical colony conditions.

408 After two weeks, colonies were exposed to field-relevant dosages (5,000 larval  
409 equivalents) of EBO, BP, or a paraffin oil control. We used a BP blend characteristic of older  
410 larvae that has been shown to strongly upregulate pollen foraging, as done previously by Ma et

411 al. [45]. Hive entrances were blocked during the one-hour period during which the pheromone  
412 treatment was applied, and any foragers outside the colony during that time were removed from  
413 the experiment when they landed on the blocked entrance. When the entrances were opened,  
414 forager bees (previously marked as nectar or pollen foragers, as described above) were collected  
415 as they landed on a pollen or nectar feeder, but before they initiated feeding. Six pollen foragers  
416 and six nectar foragers were collected from each colony and placed immediately in dry ice for  
417 later brain dissection. Subsequently, we pooled pairs of bees to generate the RNA samples.  
418 Thus, in total, there were three pollen forager and three nectar forager samples for each of the  
419 three colonies representing the control, BP and EBO treatments (Fig. 1; total number of samples  
420 = 18). Sampled individuals were stored at  $-80^{\circ}\text{C}$  until they were dissected.

#### 421 **Brain Dissection**

422 Insect mushroom bodies are considered important integration centers of the brain because  
423 of their role in multimodal information processing and their association with learning and  
424 memory [70–72]. These factors make mushroom bodies an ideal candidate brain region to  
425 investigate temporal dynamics of communication and behavior. Therefore, mushroom bodies of  
426 the brain were dissected from sampled individuals by placing them on dry ice to prevent thawing  
427 and degradation of transcripts, as in [37, 40]. However, in our study, the brains were not freeze-  
428 dried to facilitate dissection of the mushroom bodies. For each sample, RNA from two brains  
429 were extracted using the RNeasy Mini Kit (Qiagen, Valencia, CA) following the manufacturer's  
430 protocol, and pooled RNA quantity and quality were assayed using a Qubit Fluorometer  
431 (Invitrogen, Carlsbad, CA). cDNA library preparation and sequencing were performed by the  
432 Genomic Sequencing and Analysis Facility at the University of Texas at Austin using an  
433 Illumina HiSeq 4000 (Illumina, San Diego, CA) sequencer. All 18 samples were barcoded and

434 split across four lanes to control for sequencing bias. A total of 18 RNA-seq single-end 50bp  
435 libraries were generated, with three libraries for each treatment group from each colony (Fig 1).

## 436 **Data Analysis**

437 Reads were trimmed using Trimmomatic [73] to remove adapter sequences, low-quality  
438 reads, and short reads (<36 bp). Kallisto software was used to build a transcriptome index based  
439 on a recently updated honey bee reference genome annotation (Amel\_HAv3.1), and  
440 subsequently to quantify the abundance of transcripts represented in each sample [74]. The R  
441 package tximport was then used to import transcript abundances and generate a gene-level count  
442 matrix that was scaled to both library size and transcript length [75]. The transcript-gene  
443 correspondence was derived from the genome annotation using the R package rtracklayer [76].  
444 The R package DESeq2 [77] was used to collapse technical replicates (i.e. identical samples  
445 across multiple sequencing lanes) and perform differential gene expression analysis with  
446 pheromone treatment, forager type, and the interaction of pheromone treatment and forager type  
447 as fixed effects in a generalized linear model. Only genes with an abundance of at least one  
448 transcript per million in all samples were used in the analysis. Genes whose expression differed  
449 between groups were considered differentially expressed when they had a false discovery rate  
450 (FDR) of <0.05. Gene ontology analysis was performed using the Database for Annotation,  
451 Visualization and Integrated Discovery (DAVID v6.8) to better understand the biological  
452 relevance of differentially expressed genes (DEGs) [78].

453 The expression patterns of DEGs were further analyzed by performing unsupervised  
454 hierarchical clustering (Fig. 2; Supplementary Fig 1) and PCA (Fig. 3) on gene expression data  
455 normalized through variance stabilizing transformation. Hierarchical clustering was performed in  
456 R and visualized using the pheatmap package [79]. Genes were clustered using the Ward

457 method and samples were clustered based on manhattan distance. Principal component analysis  
458 (PCA) was performed to find the linear combinations of genes that explained the maximum  
459 amount of variation in the data, producing a series of orthogonal factors (i.e. principal  
460 components). PCA results were visualized in ggplot2 [80].

## 461 **Gene co-expression network analysis**

462 To generate a global unsupervised overview of the gene expression data, we utilized  
463 weighted gene correlation network analysis [57] to identify groups of co-expressed genes and  
464 assess the relationship between these groups and experimental treatments. WGCNA constructs  
465 networks of genes based solely on the similarity of their expression patterns and organized them  
466 into groups of co-expressed genes, called modules. Module assignment is unsupervised and  
467 independent of sample trait information (e.g., pheromone treatment, forager-type), and  
468 subsequently, these gene modules can be correlated with traits of interests. In this way, WGCNA  
469 can supplement other genomic and bioinformatic methods to provide a more detailed view of  
470 molecular processes associated with traits of interest.

471 Variance stabilized gene expression data were grouped into modules based on similarity  
472 of expression patterns. Because genes within each module showed very highly correlated  
473 patterns, the first principal component of the genes within a module was used to represent the  
474 entire module (module ‘eigengene’). Then, these module representatives were correlated with  
475 sample traits using a generalized linear model, with forager-type and pheromone as fixed effects  
476 (Fig. 4). Minimum module size was set to 30, and deep split was set to 2. Modules were built  
477 with a standardized connectivity score of -2.5, and module definition was based on “hybrid”  
478 branch cutting. A signed gene co-expression network was constructed with a soft threshold of 10.  
479 Modules were merged based on a cut height of 0.1. Module eigengenes were correlated with

480 sample traits using a generalized linear model with forager-type, pheromone exposure treatment,  
481 and their interaction as fixed effects.

## 482 **Overlap of differentially expressed genes with previous studies**

483           Hypergeometric tests were used to assess whether there was a significant overlap of  
484 differentially expressed genes when compared to other studies. Specifically, we tested overlap  
485 with genes regulated by long-term exposure to brood pheromone [37] and genes that varied  
486 between nurses and foragers [49]. These two studies utilized microarrays containing  
487 approximately 5,500 genes identified in an earlier genome assembly version. For consistency,  
488 microarray probes were mapped to current official honey bee gene set, as done in Khamis et al.  
489 [81]. The degree of overlap between our data and data from these two studies were assessed  
490 using hypergeometric tests in the base stats package of R.

491

492

493 **LIST OF ABBREVIATIONS**

494 BP – Brood Pheromone

495 DEG – Differentially expressed gene

496 EBO – E-beta-ocimene

497 FDR – False discovery rate

498 GO – Gene ontology

499 KEGG – Kyoto Encyclopedia of Genes and Genomes

500 PC – Principal component

501 PCA – Principal components analysis

502 RNA – Ribonucleic acid

503 RNA-Seq – RNA sequencing

504 WGCNA – Weighted gene co-expression network analysis

505

506

507 **DECLARATIONS**

508 Ethics approval and consent to participate:

509 Not applicable

510

511 Consent for publication:

512 Not applicable

513

514 Availability of data and material

515 The raw RNA-Seq data were deposited in the NCBI Sequence Read Archive under submission

516 number SUB5286697 and BioProject number PRJNA528102:

517 <http://www.ncbi.nlm.nih.gov/bioproject/528102>.

518

519 Competing Interests

520 The Authors declare that they have no competing interests.

521

522 Author's contributions:

523 RM conceived and performed the experiment. RM, JR, and CMG designed the experiment. RM

524 and CMG analyzed the data. All authors participated in writing the manuscript.

525

526 Funding

527 This work was supported from funds to JR by the Texas AgriLife Research Hatch Project

528 (TEX09557). RM was funded by the Texas Ecolab Program, the Department of Integrative

529 Biology at the University of Texas at Austin, and a National Science Foundation Graduate

530 Research Fellowship (DGE-1110007). Additional support was provided by funding to CMG from

531 a National Science Foundation Grant (MCB-1616257).

532

533 Acknowledgements

534 We would like to thank ET Ash and LA Ward for beekeeping assistance; C Stengl for generous

535 support of the graduate program at UT Austin; and LE Gilbert, HA Hofmann, S Jha, UG

536 Mueller, and members of the Grozinger lab for comments on the manuscript.



537 **FIGURE LEGENDS**

538 **Figure 1. Overview of experimental design and sequencing.** RNA-seq libraries were  
539 generated from nectar and pollen foragers exposed to three pheromone treatments. Three pooled  
540 pollen forager samples and three pooled nectar forager samples were collected for each  
541 pheromone treatment. Each bee diagram represents a sample, though two brains per used for  
542 each sample. Resulting numbers of reads per sample and percentages of those reads that mapped  
543 to honey bee genome are presented in a table to the right.

544 **Figure 2. Heatmap for the hierarchical clustering of brain gene profiles.** Honey bees  
545 foraging on pollen or nectar were exposed to pheromone treatments: Brood pheromone (BP), E-  
546 beta-ocimene (EBO), or a control. Rows correspond to differentially expressed genes, and  
547 columns represent samples. Food and pheromone treatments for each sample are represented  
548 between sample dendrogram and heatmap. The scale bar indicates z-scores of variance stabilized  
549 gene expression values, with highly expressed genes in lighter colors and lower expression in  
550 darker colors. Clustering of samples shows two branches main branches, which correspond  
551 broadly to nectar foraging (left) and pollen foraging(right); however, nectar foragers exposed to  
552 EBO have expression profiles more similar to pollen foragers. Within pollen and nectar  
553 branches, there is also a split in pheromone treatments.

554 **Figure 3. Principal component analysis of all DEG.** The first two principal components (PCs)  
555 are displayed, together representing 63% of the total variation. Each point represents a single  
556 sample. PC1 separates samples based on food preference, whereas PC2 pheromone treatment,  
557 particularly for nectar foragers. Shape represents pheromone treatment. Color represents pollen  
558 or nectar forager-type. The percentage of variation in transcript expression patterns explained by  
559 each PC is shown in the y-axis.

560 **Figure 4. Weighted gene co-expression network analysis.** Rows represent gene modules.  
561 Columns represent sample traits. Each cell contains two values: a correlation coefficient between  
562 the module and sample trait and the associated p-value in parentheses. Significant correlations  
563 are colorized according correlation coefficient, varying from high values in yellow to low values  
564 in purple.

565

566

567

568 **TABLES AND TABLE LEGENDS**

569 **Table 1: Numbers of DEG in all pairwise comparisons**

|                              |                        | <b>Upregulated</b> | <b>Downregulated</b> |
|------------------------------|------------------------|--------------------|----------------------|
| <b>Pheromone Main Effect</b> | BP vs Control          | 12                 | 46                   |
|                              | EBO vs Control         | 14                 | 138                  |
| <b>Food Main Effect</b>      | Pollen vs Nectar       | 79                 | 246                  |
| <b>Interaction Effect</b>    | BP v Control and Food  | 29                 | 39                   |
|                              | EBO v Control and Food | 55                 | 32                   |

570 **Table 2. Overlaps between pheromone-related DEG**

| <b>First Contrast</b>                                                                         | <b>Second Contrast</b> | <b>DEGs in First Contrast</b> | <b>DEGs in Second Contrast</b> | <b>Overlap</b> |
|-----------------------------------------------------------------------------------------------|------------------------|-------------------------------|--------------------------------|----------------|
| BP vs Control                                                                                 | EBO vs Control         | 58                            | 152                            | 39*            |
| *significantly greater overlap of genes than expected by chance; P<0.001; hypergeometric test |                        |                               |                                |                |

571 **Table 3 Overlaps between pheromone- and foraging-related DEG**

|                                                                                               | <b>Pheromone genes</b> | <b>Food Genes</b> | <b>Overlap</b> |
|-----------------------------------------------------------------------------------------------|------------------------|-------------------|----------------|
| BP vs Control                                                                                 | 58                     | 386               | 41*            |
| EBO vs Control                                                                                | 152                    | 386               | 71*            |
| *significantly greater overlap of genes than expected by chance; P<0.001; hypergeometric test |                        |                   |                |

572

573 **Table 4: Overlaps between pheromone- and foraging-related genes**

|                                                                                               | <b>Pheromone genes</b> | <b>Pollen Upregulated</b> | <b>Nectar Upregulated</b> | <b>Overlap Pollen</b> | <b>Overlap Nectar</b> |
|-----------------------------------------------------------------------------------------------|------------------------|---------------------------|---------------------------|-----------------------|-----------------------|
| BP vs Control                                                                                 | 58                     | 79                        | 246                       | 1                     | 40*                   |
| EBO vs Control                                                                                | 152                    | 79                        | 246                       | 0                     | 71*                   |
| *significantly greater overlap of genes than expected by chance; P<0.001; hypergeometric test |                        |                           |                           |                       |                       |

574

575

576

577 **Table 5: Overlaps between pheromone-related genes and those of Alaux et al.**

|                                                                                              | <b>Genes represented in both</b> | <b>BP genes</b> | <b>Alaux et al., BP after 5 days</b> | <b>Alaux et al., BP after 15 days</b> | <b>Overlap BP5</b> | <b>Overlap BP15</b> |
|----------------------------------------------------------------------------------------------|----------------------------------|-----------------|--------------------------------------|---------------------------------------|--------------------|---------------------|
| BP vs Control                                                                                | 6039                             | 49              | 104                                  | 85                                    | 1                  | 2*                  |
| *significantly greater overlap of genes than expected by chance; P<0.05; hypergeometric test |                                  |                 |                                      |                                       |                    |                     |

578

579 **Table 6: Overlaps between foraging-related genes and Whitfield et al.**

|                                                                                              | <b>Genes represented in both</b> | <b>Foraging-related</b> | <b>Whitfield et al</b> | <b>Overlapping genes</b> |
|----------------------------------------------------------------------------------------------|----------------------------------|-------------------------|------------------------|--------------------------|
| BP vs Control                                                                                | 6039                             | 264                     | 839                    | 48*                      |
| *significantly greater overlap of genes than expected by chance; P<0.05; hypergeometric test |                                  |                         |                        |                          |

580

581 **Table 7: WGCNA Module Hub genes**

| <b>Regulation Pattern</b>                                                   | <b>Module</b> | <b>Size</b> | <b>Hub Gene</b>         | <b>Hub Gene Description</b>                      |
|-----------------------------------------------------------------------------|---------------|-------------|-------------------------|--------------------------------------------------|
| EBO & Food                                                                  | 16            | 166         | GB52658                 | Transcription factor                             |
| All: Food, BP, & EBO                                                        | 10            | 239         | GB45943*                | Collagen alpha-5 chain                           |
| BP Only                                                                     | 7             | 560         | GB42728                 | Sodium channel protein paralytic                 |
| EBO Only                                                                    | 13            | 217         | GB45423                 | transmembrane protein                            |
|                                                                             | 3             | 900         | GB52595                 | zinc finger and BTB domain-containing protein 20 |
|                                                                             | 8             | 90          | GB45063*                | LIM/homeobox protein Lhx9                        |
|                                                                             | 24            | 267         | GB19920                 | phosphopantothenoylecysteine decarboxylase       |
|                                                                             | 6             | 540         | GB44289                 | ataxin-3                                         |
| Forager-type Only                                                           | 19            | 127         | GB50923                 | serine-protein kinase ATM                        |
|                                                                             | 21            | 145         | GB49517                 | DENN domain-containing protein 4C                |
|                                                                             | 22            | 121         | GB51059                 | four and a half LIM domains protein 2            |
|                                                                             | 15            | 168         | GB45147*                | clavesin-2                                       |
|                                                                             | 26            | 82          | GB41641*                | mitochondrial cardiolipin hydrolase              |
|                                                                             | 28            | 58          | GB50931                 | box A-binding factor                             |
|                                                                             | 5             | 594         | GB40539                 | 40S ribosomal protein S20                        |
| 25                                                                          | 89            | GB51029     | band 4.1-like protein 5 |                                                  |
| *hub genes that were also differentially expressed in at least one contrast |               |             |                         |                                                  |

582

583

584 **Table 8: KEGG analysis of selected WGCNA modules**

| <b>Module</b> | <b>Trait association</b> | <b>Significantly enriched KEGG pathways (P&lt;0.05)</b>                                                                                                                                                                                                                                                                       | <b>Significantly enriched GO categories (EASE &lt;0.05)</b>         |
|---------------|--------------------------|-------------------------------------------------------------------------------------------------------------------------------------------------------------------------------------------------------------------------------------------------------------------------------------------------------------------------------|---------------------------------------------------------------------|
| 10            | BP, EBO, Forager-type    | Metabolic pathways<br>Carbon metabolism<br>Fatty acid metabolism<br>Peroxisome                                                                                                                                                                                                                                                | Integral components of membrane,<br>Fatty acid biosynthetic process |
| 7             | BP alone                 | Glycerophospholipid metabolism<br>Neuroactive ligand-receptor interaction<br>Hippo signaling pathway                                                                                                                                                                                                                          | Ion channel                                                         |
| 3             | EBO alone                | Pentose and glucuronate interconversions<br>Metabolic pathways<br>FOXO signaling pathway<br>Neuroactive ligand-receptor interaction<br>Lysosome<br>Wnt signaling pathway<br>Dorso-ventral axis formation<br>Notch signaling pathway<br>Toll and Imd signaling pathway<br>AGE-RAGE signaling pathway in diabetic complications | Integral components of membrane                                     |

585

586

587

## REFERENCES

- 588 1. Seeley T. The wisdom of the hive: the social physiology of honey bee colonies. 2009.
- 589 2. Michener CD. Comparative social behavior of bees. *Annu Rev Entomol.* 1969;14:299–342.
- 590 3. Simpson C. The evolutionary history of division of labour. *Proc R Soc B Biol Sci.*  
591 2012;279:116–21.
- 592 4. Robinson GE, Fernald RD, Clayton DF. Genes and social behavior. *Science.* 2008;322:896–  
593 900.
- 594 5. Amador-Vargas S, Gronenberg W, Wcislo WT, Mueller U. Specialization and group size:  
595 brain and behavioural correlates of colony size in ants lacking morphological castes. *Proceedings*  
596 *Biol Sci.* 2015;282:20142502.
- 597 6. Rueffler C, Hermisson J, Wagner GP. Evolution of functional specialization and division of  
598 labor. *Proc Natl Acad Sci.* 2011.
- 599 7. Robinson GE, Barron AB. Epigenetics and the evolution of instincts. *Science.* 2017;356:26–7.
- 600 8. Barta Z. Individual variation behind the evolution of cooperation. *Philos Trans R Soc Lond B*  
601 *Biol Sci.* 2016;371:20150087.
- 602 9. NESCent Working Group on Integrative Models of Vertebrate Sociality: Evolution,  
603 Mechanisms and EP, Hofmann HA, Beery AK, Blumstein DT, Couzin ID, Earley RL, et al. An  
604 evolutionary framework for studying mechanisms of social behavior. *Trends Ecol Evol.*  
605 2014;29:581–9.
- 606 10. Ben-Shahar Y, Robichon A, Sokolowski MB, Robinson GE. Influence of Gene Action  
607 Across Different Time Scales on Behavior. *Science (80- ).* 2002;296:741–4.
- 608 11. Ortíz-Barrientos D, Noor M a F. Evidence for a one-allele assortative mating locus. *Science*  
609 (80- ). 2005;310:1467.
- 610 12. Elsik CG, Worley KC, Bennett AK, Beye M, Camara F, Childers CP, et al. Finding the  
611 missing honey bee genes: lessons learned from a genome upgrade. *BMC Genomics.* 2014;15:86.
- 612 13. Aubin-Horth N, Renn SCP. Genomic reaction norms: Using integrative biology to  
613 understand molecular mechanisms of phenotypic plasticity. *Mol Ecol.* 2009;18:3763–80.
- 614 14. Insel TR. The Challenge of Translation in Social Neuroscience: A Review of Oxytocin,  
615 Vasopressin, and Affiliative Behavior. *Neuron.* 2010;65:768–79.
- 616 15. Barron AB, Maleszka J, Vander Meer RK, Robinson GE, Maleszka R. Comparing injection,  
617 feeding and topical application methods for treatment of honeybees with octopamine. *J Insect*  
618 *Physiol.* 2007;53:187–94.
- 619 16. Goodson JL. The vertebrate social behavior network: Evolutionary themes and variations.  
620 *Horm Behav.* 2005;48:11–22.
- 621 17. Insel TR, Young LJ. Neuropeptides and the evolution of social behavior. *Curr Opin*  
622 *Neurobiol.* 2000;10:784–9.

- 623 18. Donaldson ZR, Young LJ. Oxytocin, vasopressin, and the neurogenetics of sociality.  
624 Science. 2008;322:900–4.
- 625 19. Young RL, Ferkin MH, Ockendon-Powell NF, Orr VN, Phelps SM, Pogány Á, et al.  
626 Conserved transcriptomic profiles underpin monogamy across vertebrates. Proc Natl Acad Sci.  
627 2019;:201813775.
- 628 20. Toth AL, Varala K, Newman TC, Miguez FE, Hutchison SK, Willoughby DA, et al. Wasp  
629 gene expression supports an evolutionary link between maternal behavior and eusociality.  
630 Science. 2007;318:441–4.
- 631 21. Hau M, Goymann W. Endocrine mechanisms, behavioral phenotypes and plasticity: known  
632 relationships and open questions. Front Zool. 2015;12 Suppl 1:S7.
- 633 22. Schaefer N, Rotermund C, Blumrich E-M, Lourenco M V., Joshi P, Hegemann RU, et al.  
634 The malleable brain: plasticity of neural circuits and behavior - a review from students to  
635 students. J Neurochem. 2017;142:790–811.
- 636 23. Rittschof CC, Hughes KA. Advancing behavioural genomics by considering timescale. Nat  
637 Commun. 2018;9:489.
- 638 24. Weir J. Polyethism in workers of the ant *Myrmica*. Insectes Soc. 1958;5:97–128.
- 639 25. Robinson GE. Regulation of honey bee age polyethism by juvenile hormone. Behav Ecol  
640 Sociobiol. 1987;20:329–38.
- 641 26. Calderone NW, Page RE. Genotypic variability in age polyethism and task specialization in  
642 the honey bee, *Apis mellifera* (Hymenoptera: Apidae). Behav Ecol Sociobiol. 1988;22:17–25.
- 643 27. Seeley TD. Honeybee ecology: a study of adaptation in social life. Princeton, New Jersey:  
644 Princeton University Press; 2014.
- 645 28. Fewell JH, Page Jr. RE. Genotypic Variation in Foraging Responses to Environmental  
646 Stimuli by Honey Bees, *Apis mellifera*. Experientia. 1993;49:1106–12.
- 647 29. Haydak MH. Honey Bee Nutrition. Annu Rev Entomol. 1970;15:143–56.
- 648 30. Camazine S. The regulation of pollen foraging by honey bees: how foragers assess the  
649 colony's need for pollen. Behav Ecol Sociobiol. 1993;32:265–72.
- 650 31. Pankiw T, Page Jr RE. Response thresholds to sucrose predict foraging division of labor in  
651 honeybees. Behav Ecol Sociobiol. 2000;47:265–7.
- 652 32. Kocher SD, Ayroles JF, Stone EA, Grozinger CM. Individual variation in pheromone  
653 response correlates with reproductive traits and brain gene expression in worker honey bees.  
654 PLoS One. 2010;5.
- 655 33. Metz BN, Pankiw T, Tichy SE, Aronstein KA, Crewe RM. Variation in and responses to  
656 brood pheromone of the honey bee (*Apis mellifera* L.). J Chem Ecol. 2010;36:432–40.
- 657 34. Grozinger CM, Sharabash NM, Whitfield CW, Robinson GE. Pheromone-mediated gene  
658 expression in the honey bee brain. Proc Natl Acad Sci U S A. 2003;100 suppl. 2:14519–25.
- 659 35. Alaux C, Robinson GE. Alarm pheromone induces immediate-early gene expression and

- 660 slow behavioral response in honey bees. *J Chem Ecol.* 2007;33:1346–50.
- 661 36. Alaux C, Sinha S, Hasadsri L, Hunt GJ, Guzmán-Novoa E, DeGrandi-Hoffman G, et al.  
662 Honey bee aggression supports a link between gene regulation and behavioral evolution. *Proc*  
663 *Natl Acad Sci U S A.* 2009;106:15400–5.
- 664 37. Alaux C, Le Conte Y, Adams H, Rodriguez-Zas S, Grozinger C, Sinha S, et al. Regulation of  
665 brain gene expression in honey bees by brood pheromone. *Genes Brain Behav.* 2009;8:309–19.
- 666 38. Slessor KN, Winston ML, Le Conte Y. Pheromone communication in the honeybee (*Apis*  
667 *mellifera* L.). *J Chem Ecol.* 2005;31:2731–45.
- 668 39. Whitfield CW, Cziko A-M, Robinson GE. Gene expression profiles in the brain predict  
669 behavior in individual honey bees. *Science.* 2003;302:296–9.
- 670 40. Grozinger CM, Sharabash NM, Whitfield CW, Robinson GE. Pheromone-mediated gene  
671 expression in the honey bee brain. *Proc Natl Acad Sci U S A.* 2003;100 Suppl 2 suppl 2:14519–  
672 25.
- 673 41. Lutz CC, Robinson GE. Activity-dependent gene expression in honey bee mushroom bodies  
674 in response to orientation flight. *J Exp Biol.* 2013;216 Pt 11:2031–8.
- 675 42. Wanner KW, Nichols AS, Walden KKO, Brockmann A, Luetje CW, Robertson HM. A  
676 honey bee odorant receptor for the queen substance 9-oxo-2-decenoic acid. *Proc Natl Acad Sci U*  
677 *S A.* 2007;104:14383–8.
- 678 43. Beggs KT, Glendinning KA, Marechal NM, Vergoz V, Nakamura I, Slessor KN, et al. Queen  
679 pheromone modulates brain dopamine function in worker honey bees.
- 680 44. Pankiw T, Page Jr RE, Kim Fondrk M. Brood pheromone stimulates pollen foraging in  
681 honey bees (*Apis mellifera*). *Behav Ecol Sociobiol.* 1998;44:193–8.
- 682 45. Pankiw T. Brood Pheromone Regulates Foraging Activity of Honey Bees (Hymenoptera:  
683 Apidae). *J Econ Entomol.* 2004;97:748–51.
- 684 46. Traynor KS, Le Conte Y, Page REJ. Age matters: Pheromone profiles of larvae differentially  
685 influence foraging behaviour in the honeybee, *Apis mellifera* . *Anim Behav.* 2015;99:1–8.
- 686 47. Ma R, Mueller UG, Rangel J. Assessing the role of  $\beta$ -ocimene in regulating foraging  
687 behavior of the honey bee, *Apis mellifera*. *Apidologie.* 2016;47:135–44.
- 688 48. Ma R, Villar G, Grozinger CM, Rangel J. Larval pheromones act as colony-wide regulators  
689 of collective foraging behavior in honeybees. *Behav Ecol.* 2018;29:1132–41.
- 690 49. Whitfield CW. Gene Expression Profiles in the Brain Predict Behavior in Individual Honey  
691 Bees. *Science* (80- ). 2003;302:296–9.
- 692 50. Le Conte Y, Hefetz A. Primer pheromones in social hymenoptera. *Annu Rev Entomol.*  
693 2008;53:523–42.
- 694 51. Wyatt T. Pheromones and Animal Behaviour: communication by smell and taste. 1st Editio.  
695 Cambridge: Cambridge University Press; 2003.
- 696 52. Winston ML. The Biology of the Honey Bee. Cambridge: Harvard University Press; 1991.

- 697 53. Fewell J, Winston M. Colony state and regulation of pollen foraging in the honey bee, *Apis*  
698 *mellifera* L. *Behav Ecol Sociobiol.* 1992;30:387–93.
- 699 54. Robinson GE, Page RE. Genetic determination of nectar foraging, pollen foraging, and nest-  
700 site scouting in honey bee colonies. *Behav Ecol Sociobiol.* 1989;24:317–23.
- 701 55. Sagili RR, Pankiw T, Metz BN. Division of labor associated with brood rearing in the honey  
702 bee: how does it translate to colony fitness? *PLoS One.* 2011;6:e16785.
- 703 56. Ruppell O, Pankiw T, Page RE. Pleiotropy, epistasis and new QTL: The genetic architecture  
704 of honey bee foraging behavior. *J Hered.* 2004;95:481–91.
- 705 57. Langfelder P, Horvath S. WGCNA: an R package for weighted correlation network analysis.  
706 *BMC Bioinformatics.* 2008;9:559.
- 707 58. Lutz CC, Rodriguez-Zas SL, Fahrbach SESE, Robinson GE. Transcriptional response to  
708 foraging experience in the honey bee mushroom bodies. *Dev Neurobiol.* 2012;72:153–66.
- 709 59. Ament SA, Corona M, Pollock HS, Robinson GE. Insulin signaling is involved in the  
710 regulation of worker division of labor in honey bee colonies. 2008.
- 711 60. Greenberg JK, Xia J, Zhou X, Thatcher SR, Gu X, Ament S a, et al. Behavioral plasticity in  
712 honey bees is associated with differences in brain microRNA transcriptome. *Genes Brain Behav.*  
713 2012;11:660–70.
- 714 61. A. B, D. S, G. R. Octopamine modulates responsiveness to foraging-related stimuli in honey  
715 bees ( *Apis mellifera* ). *J Comp Physiol A Sensory, Neural, Behav Physiol.* 2002;188:603–10.
- 716 62. Schulz DJ, Barron AB, Robinson GE. A Role for Octopamine in Honey Bee Division of  
717 Labor. *Brain Behav Evol.* 2002;60:350–9.
- 718 63. Ament SA, Chan QW, Wheeler MM, Nixon SE, Johnson SP, Rodriguez-Zas SL, et al.  
719 Mechanisms of stable lipid loss in a social insect. *J Exp Biol.* 2011;214 Pt 22:3808–21.
- 720 64. Wang Y, Mutti NS, Ihle KE, Siegel A, Dolezal AG, Kaftanoglu O, et al. Down-Regulation of  
721 Honey Bee IRS Gene Biases Behavior toward Food Rich in Protein. *PLoS Genet.*  
722 2010;6:e1000896.
- 723 65. Wang Y, Brent CS, Fennern E, Amdam G V. Gustatory Perception and Fat Body Energy  
724 Metabolism Are Jointly Affected by Vitellogenin and Juvenile Hormone in Honey Bees. *PLoS*  
725 *Genet.* 2012;8:e1002779.
- 726 66. Wu Q, Brown MR. Signaling and Function of Insulin-Like Peptides in Insects. *Annu Rev*  
727 *Entomol.* 2005;51:1–24.
- 728 67. Rittschof CC, Grozinger CM, Robinson GE. The energetic basis of behavior: Bridging  
729 behavioral ecology and neuroscience. *Curr Opin Behav Sci.* 2015;6:19–27.
- 730 68. Chandrasekaran S, Rittschof CC, Djukovic D, Gu H, Raftery D, Price ND, et al. Aggression  
731 is associated with aerobic glycolysis in the honey bee brain <sup>1</sup>. *Genes, Brain Behav.* 2015;14:158–  
732 66.
- 733 69. Li-Byarlay H, Rittschof CC, Massey JH, Pittendrigh BR, Robinson GE. Socially responsive



- 734 effects of brain oxidative metabolism on aggression. *PNAS*. 2014;111:12533–7.
- 735 70. Menzel R. The insect mushroom body, an experience-dependent recoding device. *J Physiol*.  
736 2014;108:84–95.
- 737 71. Farris SM. Are mushroom bodies cerebellum-like structures? *Arthropod Struct Dev*.  
738 2011;40:368–79.
- 739 72. Lihoreau M, Latty T, Chittka L. An exploration of the social brain hypothesis in insects.  
740 2012;3 November:1–7.
- 741 73. Bolger A, Lohse M, Usadel B. Trimmomatic: a flexible trimmer for Illumina sequence data.  
742 *Bioinformatics*. 2014.
- 743 74. Bray NL, Pimentel H, Melsted P, Pachter L. Near-optimal probabilistic RNA-seq  
744 quantification. *Nat Biotechnol*. 2016;34:525–7.
- 745 75. Sonesson C, Love MI, Robinson MD. Differential analyses for RNA-seq: transcript-level  
746 estimates improve gene-level inferences. *F1000Research*. 2015;4:1521.
- 747 76. Lawrence M, Gentleman R, Carey V. rtracklayer: an R package for interfacing with genome  
748 browsers. *Bioinformatics*. 2009;25:1841–2.
- 749 77. Love M, Anders S, Huber W. Differential analysis of count data—the DESeq2 package.  
750 *Genome Biol*. 2014.
- 751 78. Huang DW, Sherman BT, Lempicki RA. Systematic and integrative analysis of large gene  
752 lists using DAVID bioinformatics resources. *Nat Protoc*. 2008;4:44–57.
- 753 79. Kolde R. pheatmap: Pretty Heatmaps. 2018.
- 754 80. Wickham H. ggplot2. *Wiley Interdiscip Rev Comput Stat*. 2011;3:180–5.
- 755 81. Khamis AM, Hamilton AR, Medvedeva YA, Alam T, Alam I, Essack M, et al. Insights into  
756 the Transcriptional Architecture of Behavioral Plasticity in the Honey Bee *Apis mellifera*.  
757 2015;5:11136.
- 758

759

## Supplementary Materials

### 760 Table and Figure Legends

761 Supplementary Table 1. Transcriptome assembly quality metrics averaged across four technical  
762 replicates per sample, given in numbers of sequences per sample and as percentages  
763 of original sequencing reads per sample.

764 Supplementary Table 2. Entrez gene IDs of differentially up-regulated and down regulated genes  
765 in the context of pheromone exposure, foraging task-specialization, and their  
766 interaction.

767 Supplementary Table 3. Dictionary of transcripts, Entrez Gene ID, BeeBase ID, and Accession  
768 numbers for all transcripts in the study.

769

770

771 Supplementary Figure 1. Hierarchical clustering with multiscale bootstrap resampling confirms  
772 that bees exposed to identical pheromone exposure and forager-type produced distinctive  
773 transcriptional profiles in honey bee brains. For each cluster, two p-values are displayed on edges,  
774 expressed as percentages. The red number on the left represents the Approximately Unbiased (AU)  
775 method, and the green number on the right represents bootstrap probability (BP). Red rectangles  
776 indicate significant clusters with AU values greater than 95, indicating strongly supported clusters.  
777 Samples names denote pheromone exposure (i.e. Control (X), brood pheromone (BP), and E-beta-  
778 ocimene (EBO), forager type (Pollen (pol) vs nectar (N), or and sample number (1-3). This analysis  
779 used all 533 DEGs identified in this study.

780

781 Supplementary Figure 2. Clustering of variance stabilized gene expression data during co-  
782 expression network analysis. Modules were formed independently of sample information, and  
783 the colors under the cluster dendrogram indicate the assignment of co-expressed genes to  
784 modules. “Dynamic tree cut” colors indicate original module assignments before merging similar  
785 modules (cut height 0.1), while “Merged dynamic” colors represent final module assignments  
786 after merging similar modules.

Colonies exposed to pheromone

Pollen and nectar foragers collected

RNAseq libraries generated

Control  
(X)

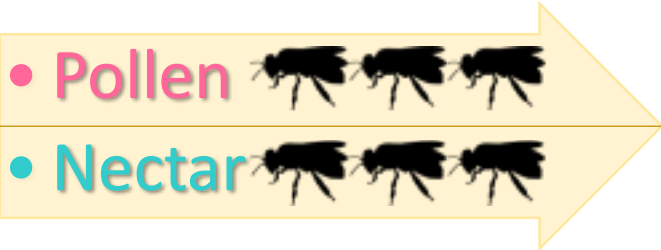

| Sample Name | Total Reads | % Pseudoaligned |
|-------------|-------------|-----------------|
| X_pol_3     | 69,898,738  | 70.6            |
| X_pol_2     | 90,816,956  | 49.5            |
| X_pol_1     | 72,815,162  | 67.5            |
| X_nect_3    | 94,642,154  | 70.5            |
| X_nect_2    | 48,938,453  | 70.6            |
| X_nect_1    | 41,309,867  | 69.8            |

(E)-beta-ocimene  
(Oci)

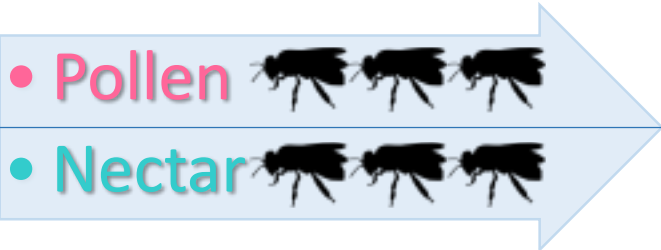

|            |            |      |
|------------|------------|------|
| Oci_pol_3  | 65,478,974 | 69.6 |
| Oci_pol_2  | 64,490,416 | 69.1 |
| Oci_pol_1  | 56,405,749 | 67.1 |
| Oci_nect_3 | 58,415,925 | 70.4 |
| Oci_nect_2 | 74,797,382 | 70.9 |
| Oci_nect_1 | 53,047,267 | 69.9 |

Brood Pheromone  
(BP)

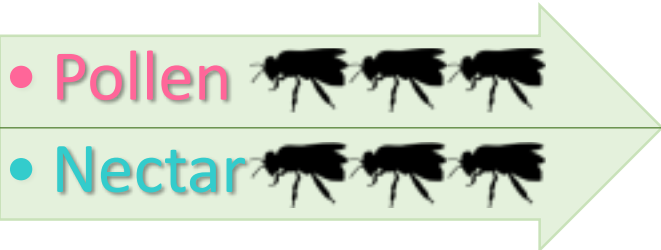

|           |            |      |
|-----------|------------|------|
| BP_pol_3  | 77,241,988 | 71.4 |
| BP_pol_2  | 59,092,018 | 69.1 |
| BP_pol_1  | 67,128,679 | 72.6 |
| BP_nect_3 | 63,979,027 | 69.0 |
| BP_nect_2 | 53,645,693 | 73.8 |
| BP_nect_1 | 71,942,514 | 72.2 |

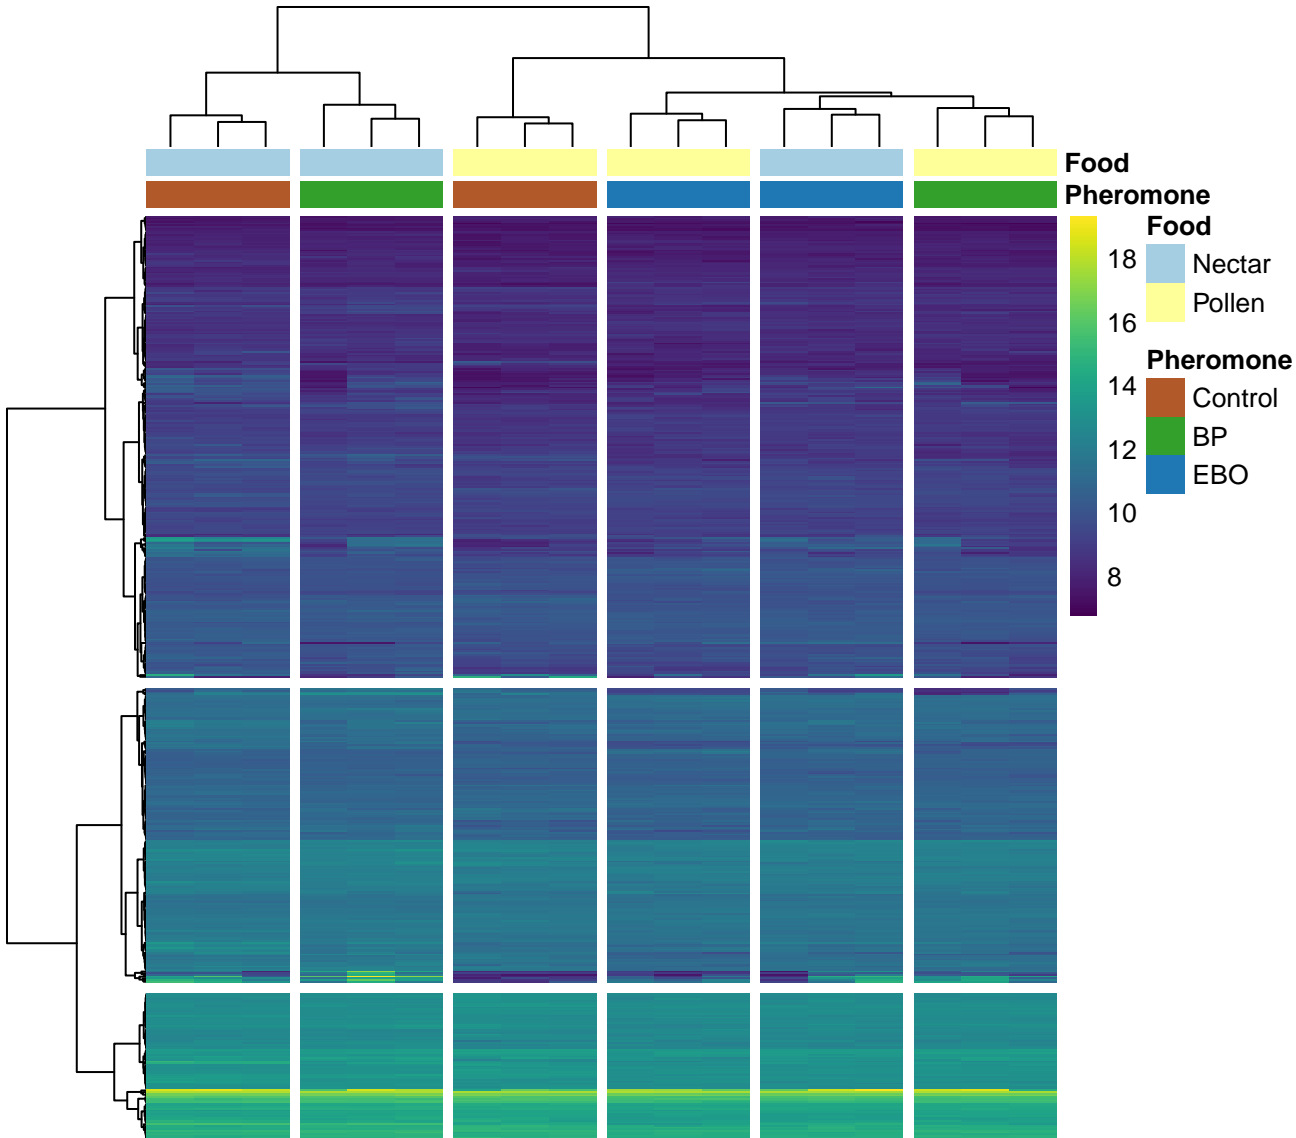

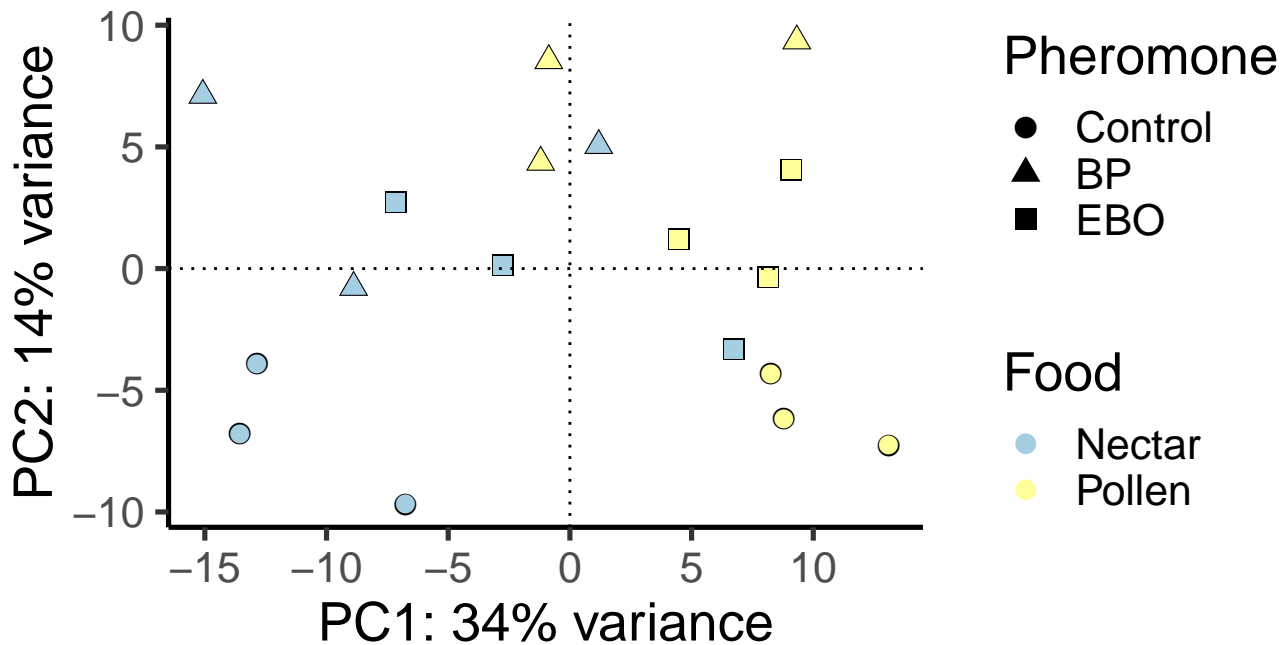

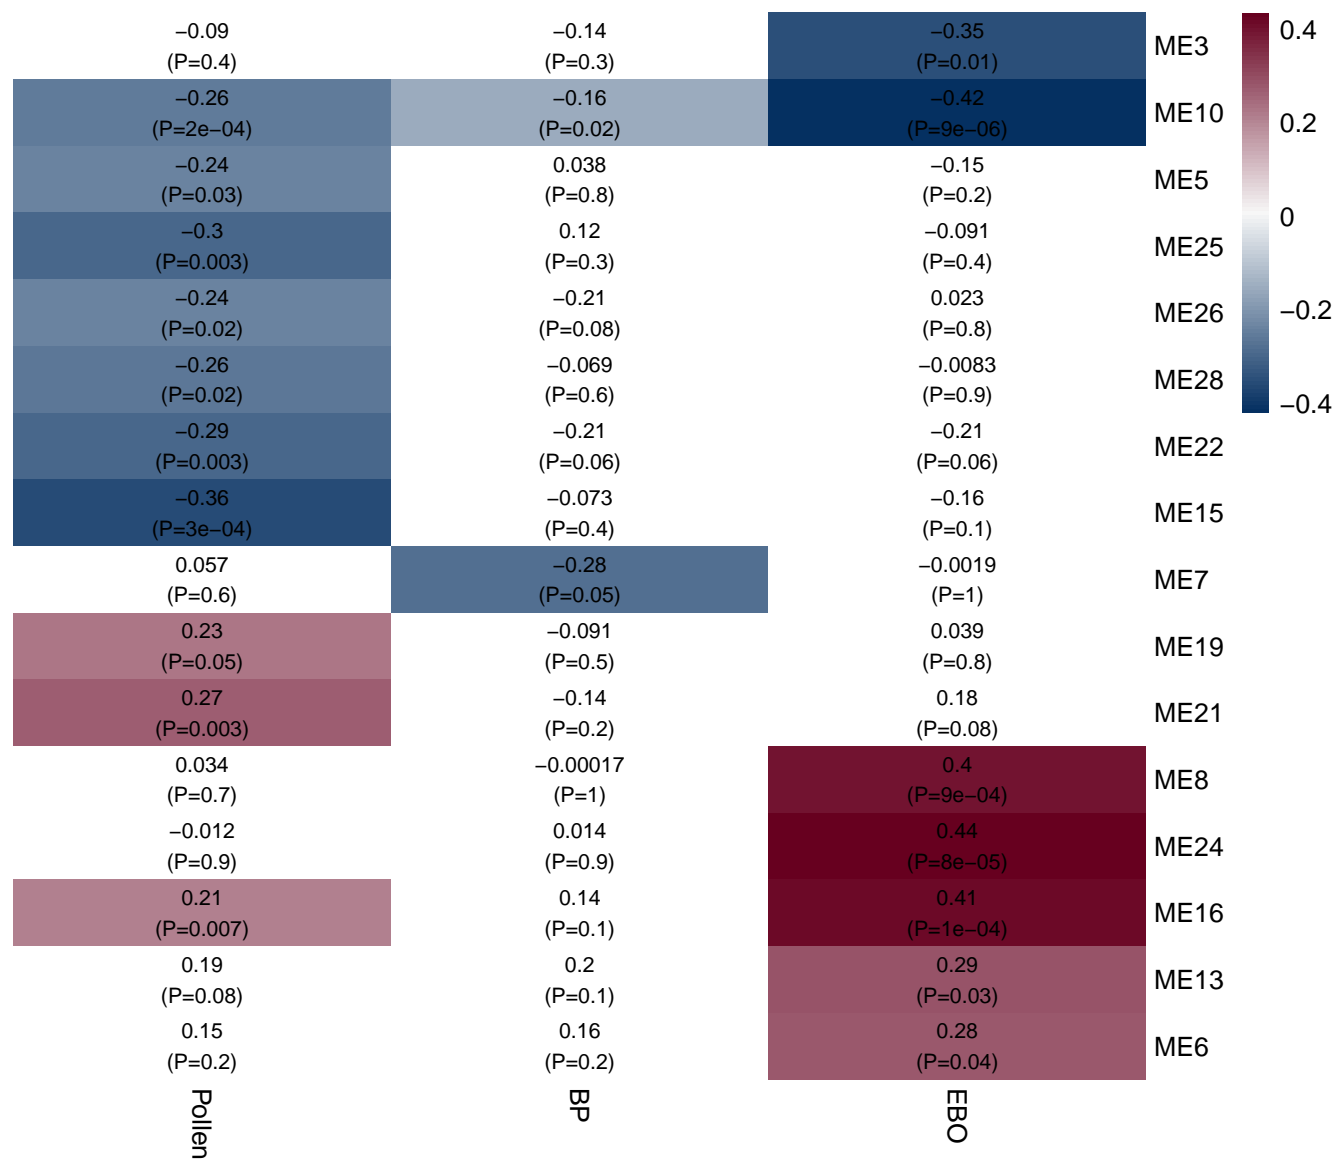

Source: http://biorxiv.org/content/10.1101/587113v1.full.pdf
