# Supplementary material for: Honey bee (Apis mellifera) larval pheromones regulate gene expression related to foraging task specialization
Source: bioRxiv preprint, doi:10.1101/587113, version 1 (2019-03-23)
Supplement: Supplemental Table 3 [file 587113_file11.csv]

	ID	GeneID	GenbankID	OtherID
1	rna0	551580	Genbank:XM_623972.6	GB42195
2	rna1	551580	Genbank:XR_001705491.2	GB42195
3	rna2	551580	Genbank:XR_001705490.2	GB42195
4	rna3	551555	Genbank:XM_006557405.3	GB42138
5	rna4	551555	Genbank:XM_006557404.3	GB42138
6	rna5	551555	Genbank:XM_623949.6	GB42138
7	rna6	551555	Genbank:XM_006557406.3	GB42138
8	rna7	726347	Genbank:XM_026446303.1	GB42194
9	rna8	409940	Genbank:XM_026439913.1	GB42139
10	rna9	409940	Genbank:NM_001242554.1	GB42139
11	rna10	726145	Genbank:XM_016917677.1	GB42193
12	rna11	726145	Genbank:XM_016917679.2	GB42193
13	rna12	551448	Genbank:XM_016917662.2	GB42140
14	rna13	551448	Genbank:XM_026440071.1	GB42140
15	rna14	551448	Genbank:XM_016917667.2	GB42140
16	rna15	551448	Genbank:XM_006557400.3	GB42140
17	rna16	551448	Genbank:XM_016917672.2	GB42140
18	rna17	410665	Genbank:XM_394142.7	GB42192
19	rna18	408567	Genbank:XM_392111.7	GB42141
20	rna19	107964061	Genbank:XM_016910851.2)
21	rna20	107964061	Genbank:XM_016910856.2)
22	rna21	107964068	Genbank:XR_001702207.2)
23	rna22	113219112	Genbank:XM_026443867.1)
24	rna23	726450	Genbank:XM_006557392.2	GB42142
25	rna24	107964063	Genbank:XR_001702201.2)
26	rna25	113219111	Genbank:XM_026443863.1)
27	rna26	410664	Genbank:XM_006557389.3	GB42190
28	rna27	410664	Genbank:XM_026443894.1	GB42190
29	rna28	410664	Genbank:XM_394141.4	GB42190
30	rna29	410664	Genbank:XM_006557388.1	GB42190
31	rna30	408565	Genbank:XM_006557391.3	GB42143
32	rna31	408565	Genbank:XM_392109.6	GB42143
33	rna32	408565	Genbank:XM_016910832.2	GB42143
34	rna33	410663	Genbank:XM_006557387.3	GB42189
35	rna34	410663	Genbank:XM_394140.7	GB42189
36	rna35	113219398	Genbank:XM_026446104.1)
37	rna36	726544	Genbank:XM_016910793.2	GB42188
38	rna37	726544	Genbank:XM_006557376.3	GB42188
39	rna38	726544	Genbank:XM_016910803.2	GB42188
40	rna39	726544	Genbank:XM_006557380.3	GB42188
41	rna40	726544	Genbank:XM_006557381.3	GB42188
42	rna41	726544	Genbank:XM_001122271.5	GB42188
43	rna42	726544	Genbank:XM_006557386.3	GB42188
44	rna43	726544	Genbank:XM_006557383.3	GB42188
45	rna44	726544	Genbank:XM_006557382.3	GB42188
46	rna45	726544	Genbank:XM_006557384.3	GB42188
47	rna46	726544	Genbank:XM_006557379.3	GB42188
48	rna47	726544	Genbank:XM_006557385.3	GB42188
49	rna48	726544	Genbank:XM_016910810.2	GB42188
50	rna49	732506	Genbank:NR_031523.1	miRBase:MI0001590)
51	rna50	732506	miRBase:MIMAT0001485	miRBase:MI0001590)
52	rna51	732505	Genbank:NR_031522.1	miRBase:MI0001589)
53	rna52	732505	miRBase:MIMAT0001485	miRBase:MI0001589)
54	rna53	104796173	Genbank:NR_127369.1	miRBase:MI0031814)
55	rna54	104796173	miRBase:MIMAT0037292	miRBase:MI0031814)
56	rna55	100315690	Genbank:NR_034307.1	miRBase:MI0010609)
57	rna56	100315690	miRBase:MIMAT0010114	miRBase:MI0010609)
58	rna57	100315660	Genbank:NR_034285.1	miRBase:MI0005730)
59	rna58	100315660	miRBase:MIMAT0004422	miRBase:MI0005730)
60	rna59	100315662	Genbank:NR_034287.1	miRBase:MI0005732)
61	rna60	100315662	miRBase:MIMAT0001485	miRBase:MI0005732)
62	rna61	100315669	Genbank:NR_034296.1	miRBase:MI0005741)
63	rna62	100315669	miRBase:MIMAT0004432	miRBase:MI0005741)
64	rna63	410772	Genbank:XR_003305810.1	GB42186
65	rna64	410772	Genbank:XM_026444102.1	GB42186
66	rna65	410772	Genbank:XM_394248.6	GB42186
67	rna66	551203	Genbank:XM_026446225.1	GB42145
68	rna67	551203	Genbank:XM_026446229.1	GB42145
69	rna68	551203	Genbank:XM_026446228.1	GB42145
70	rna69	551203	Genbank:XM_026446230.1	GB42145
71	rna70	551203	Genbank:XM_026446227.1	GB42145
72	rna71	551203	Genbank:XM_026446232.1	GB42145
73	rna72	551203	Genbank:XM_026446234.1	GB42145
74	rna73	551203	Genbank:XM_026446237.1	GB42145
75	rna74	551203	Genbank:XM_026446226.1	GB42145
76	rna75	551203	Genbank:XM_026446233.1	GB42145
77	rna76	551203	Genbank:XM_026446235.1	GB42145
78	rna77	551203	Genbank:XM_026446236.1	GB42145
79	rna78	551203	Genbank:XM_026446231.1	GB42145
80	rna79	100578621	Genbank:XM_026446241.1	GB42184
81	rna80	100578621	Genbank:XM_026446239.1	GB42184
82	rna81	100578621	Genbank:XM_016910677.2	GB42184
83	rna82	100578621	Genbank:XM_026446240.1	GB42184
84	rna83	100578621	Genbank:XM_026446242.1	GB42184
85	rna84	726446	Genbank:XM_001120565.5)
86	rna85	100578600	Genbank:XM_003249064.4	GB42183
87	rna86	410771	Genbank:XM_016918148.2	GB42150
88	rna87	410771	Genbank:XM_016918144.2	GB42150
89	rna88	410771	Genbank:XM_006557369.3	GB42150
90	rna89	410771	Genbank:XM_016918147.2	GB42150
91	rna90	410771	Genbank:XM_006557372.3	GB42150
92	rna91	100578571	Genbank:XM_016910683.2	GB42182
93	rna92	100629100	Genbank:NR_039462.1	miRBase:MI0016172)
94	rna93	100629100	miRBase:MIMAT0018542	miRBase:MI0016172)
95	rna94	102654047	Genbank:XM_006557374.3)
96	rna95	100577692	Genbank:XM_026441502.1	GB42180
97	rna96	100577692	Genbank:XR_001706010.2	GB42180
98	rna97	100577692	Genbank:XR_001706008.2	GB42180
99	rna98	100577692	Genbank:XR_003304966.1	GB42180
100	rna99	107965716	Genbank:XR_001706027.2)
101	rna100	410769	Genbank:XM_394245.6	GB42152
102	rna101	410769	Genbank:XM_016916693.2	GB42152
103	rna102	100216325	Genbank:NM_001141964.1)
104	rna103	113219286	Genbank:XR_003306183.1)
105	rna104	100578334	Genbank:XM_003249062.4	GB42177
106	rna105	726756	Genbank:XR_407471.3	GB42155
107	rna106	726756	Genbank:XM_001122476.5	GB42155
108	rna107	410767	Genbank:XR_407453.3	GB42156
109	rna108	410767	Genbank:NM_001204751.1	GB42156
110	rna109	100629079	Genbank:NR_039460.1	miRBase:MI0016170)
111	rna110	100629079	miRBase:MIMAT0018540	miRBase:MI0016170)
112	rna111	726609	Genbank:XM_006557359.3	GB11203
113	rna112	726609	Genbank:XM_016914916.2	GB11203
114	rna113	726609	Genbank:XM_006557358.3	GB11203
115	rna114	726788	Genbank:XM_001122509.5	GB42173
116	rna115	100578031	Genbank:XM_006557357.3	GB42172
117	rna116	100578031	Genbank:XM_016917835.2	GB42172
118	rna117	100578031	Genbank:XM_026441961.1	GB42172
119	rna118	100578031	Genbank:XM_016917834.2	GB42172
120	rna119	107966044	Genbank:XR_001706436.2)
121	rna120	410766	Genbank:XM_006557355.2	GB42159
122	rna121	410766	Genbank:XM_006557354.2	GB42159
123	rna122	410766	Genbank:XM_026446332.1	GB42159
124	rna123	551646	Genbank:XM_026446257.1	GB42170
125	rna124	107966077
126	rna125	113219417	Genbank:XM_026446333.1)
127	rna126	113219404	Genbank:XM_026446258.1)
128	rna127	551678	Genbank:XM_006557352.3	GB42168
129	rna128	551678	Genbank:XM_624067.5	GB42168
130	rna129	107966076
131	rna130	726886	Genbank:XM_026439854.1)
132	rna131	100577848	Genbank:XR_407459.3)
133	rna132	113219278	Genbank:XR_003306169.1)
134	rna133	408626	Genbank:XM_006557350.3	GB42161
135	rna134	408626	Genbank:XM_006557351.3	GB42161
136	rna135	408626	Genbank:XM_016917789.2	GB42161
137	rna136	408626	Genbank:XM_016917790.2	GB42161
138	rna137	102655614	Genbank:XR_407457.3)
139	rna138	726912	Genbank:XM_016917650.2	GB42164
140	rna139	726912	Genbank:XM_026440446.1	GB42164
141	rna140	100628995	Genbank:NR_039432.1	miRBase:MI0016140)
142	rna141	100628995	miRBase:MIMAT0018510	miRBase:MI0016140)
143	rna142	100629094	Genbank:NR_039430.1	miRBase:MI0016138)
144	rna143	100629094	miRBase:MIMAT0018508	miRBase:MI0016138)
145	rna144	102655442	Genbank:XR_003304627.1)
146	rna145	102655442	Genbank:XR_407455.3)
147	rna146	107965930	Genbank:XR_003304626.1)
148	rna147	113219285	Genbank:XR_003306182.1)
149	rna148	100576602	Genbank:XR_003306485.1)
150	rna149	100576602	Genbank:XR_003306483.1)
151	rna150	100576602	Genbank:XR_003306479.1)
152	rna151	100576602	Genbank:XR_407901.3)
153	rna152	100576602	Genbank:XR_003306482.1)
154	rna153	100576602	Genbank:XR_003306484.1)
155	rna154	100576602	Genbank:XR_003306480.1)
156	rna155	100576602	Genbank:XR_001702155.2)
157	rna156	100576602	Genbank:XR_003306481.1)
158	rna157	113218530	Genbank:XM_026446031.1)
159	rna158	100576537	Genbank:XR_407902.3	GB47705
160	rna159	100576700	Genbank:XM_006558554.3	GB47718
161	rna160	100576700	Genbank:XM_026446034.1	GB47718
162	rna161	100576700	Genbank:XM_006558552.3	GB47718
163	rna162	100576700	Genbank:XM_026446033.1	GB47718
164	rna163	107966080
165	rna164	113219393	Genbank:XR_003306491.1)
166	rna165	102653619	Genbank:XR_003306490.1)
167	rna166	102653619	Genbank:XR_003306488.1)
168	rna167	102653619	Genbank:XR_003306487.1)
169	rna168	102653619	Genbank:XR_003306489.1)
170	rna169	102653619	Genbank:XR_001702156.2)
171	rna170	102653619	Genbank:XR_003306486.1)
172	rna171	107963981	Genbank:XR_001702158.2)
173	rna172	724948	Genbank:XM_026446035.1	GB47719
174	rna173	724948	Genbank:XM_006558620.3	GB47719
175	rna174	100576789	Genbank:XM_003249303.4	GB47720
176	rna175	100576789	Genbank:XM_026446036.1	GB47720
177	rna176	113219394	Genbank:XM_026446039.1)
178	rna177	113219394	Genbank:XM_026446038.1)
179	rna178	113219394	Genbank:XM_026446043.1)
180	rna179	113219394	Genbank:XM_026446037.1)
181	rna180	113219394	Genbank:XR_003306492.1)
182	rna181	113219394	Genbank:XM_026446045.1)
183	rna182	113219394	Genbank:XM_026446047.1)
184	rna183	113219394	Genbank:XM_026446041.1)
185	rna184	113219394	Genbank:XM_026446046.1)
186	rna185	113219394	Genbank:XM_026446042.1)
187	rna186	113219394	Genbank:XM_026446044.1)
188	rna187	113219394	Genbank:XM_026446040.1)
189	rna188	100576820	Genbank:XM_026446049.1	GB47721
190	rna189	724874	Genbank:XM_003249306.4	GB47723
191	rna190	724874	Genbank:XM_006558561.3	GB47723
192	rna191	724874	Genbank:XM_016910716.2	GB47723
193	rna192	724874	Genbank:XM_026446048.1	GB47723
194	rna193	751098	Genbank:XM_026442989.1	GB47694
195	rna194	751098	Genbank:XM_026442949.1	GB47694
196	rna195	751098	Genbank:XM_026442921.1	GB47694
197	rna196	751098	Genbank:XM_026442862.1	GB47694
198	rna197	751098	Genbank:NM_001077823.2	GB47694
199	rna198	113219395	Genbank:XM_026446050.1)
200	rna199	410763	Genbank:XM_006558574.3	GB47689
201	rna200	100576088	Genbank:XM_026446259.1	GB47724
202	rna201	410765	Genbank:XM_003249309.4	GB47725
203	rna202	113219396	Genbank:XM_026446051.1)
204	rna203	408625	Genbank:XM_026446052.1	GB47687
205	rna204	113218523	Genbank:XM_006558575.3)
206	rna205	102654759	Genbank:XR_407921.3)
207	rna206	102654759	Genbank:XR_003305921.1)
208	rna207	113219182	Genbank:XR_003305923.1)
209	rna208	724679	Genbank:XM_026444468.1	GB47727
210	rna209	102654998	Genbank:XR_001703024.2)
211	rna210	102654998	Genbank:XR_003306529.1)
212	rna211	102654998	Genbank:XR_003306531.1)
213	rna212	102654998	Genbank:XR_001703023.2)
214	rna213	409327	Genbank:XM_397559.7	GB47728
215	rna214	409327	Genbank:XM_026446238.1	GB47728
216	rna215	409327	Genbank:XM_026446243.1	GB47728
217	rna216	409327	Genbank:XM_006558576.3	GB47728
218	rna217	409327	Genbank:XM_006558577.3	GB47728
219	rna218	113219405	Genbank:XR_003306535.1)
220	rna219	113219405	Genbank:XR_003306532.1)
221	rna220	724537	Genbank:XM_001120426.5	GB47732
222	rna221	724537	Genbank:XM_016912272.2	GB47732
223	rna222	102655107	Genbank:XM_006558578.3)
224	rna223	409620	Genbank:XM_026439223.1	GB47683
225	rna224	409620	Genbank:XM_026439220.1	GB47683
226	rna225	100577325	Genbank:XM_003249312.4	GB47734
227	rna226	100577325	Genbank:XM_003249313.4	GB47734
228	rna227	113219401	Genbank:XR_003306523.1)
229	rna228	551204	Genbank:XM_623599.6	GB47735
230	rna229	724372	Genbank:XM_006558582.3)
231	rna230	724372	Genbank:XM_006558581.3)
232	rna231	725343	Genbank:XM_026446194.1	GB47736
233	rna232	725306	Genbank:XM_006558584.3	GB47680
234	rna233	725306	Genbank:XM_006558583.3	GB47680
235	rna234	409930	Genbank:XM_393421.5	GB47679
236	rna235	409931	Genbank:XM_016912185.2	GB47678
237	rna236	409931	Genbank:XM_393422.7	GB47678
238	rna237	107964458	Genbank:XR_001702974.2)
239	rna238	100578066	Genbank:XM_006558591.3)
240	rna239	100578066	Genbank:XM_006558590.3)
241	rna240	100578066	Genbank:XM_006558588.3)
242	rna241	100578066	Genbank:XM_026444753.1)
243	rna242	100578066	Genbank:XM_006558587.3)
244	rna243	100578066	Genbank:XM_006558593.3)
245	rna244	100578066	Genbank:XM_026444772.1)
246	rna245	107964442	Genbank:XR_003305983.1)
247	rna246	113219207	Genbank:XR_003305979.1)
248	rna247	113219207	Genbank:XR_003305978.1)
249	rna248	113219214	Genbank:XR_003305995.1)
250	rna249	113219214	Genbank:XR_003305996.1)
251	rna250	411665	Genbank:XM_006558585.3	GB47675
252	rna251	411665	Genbank:XM_395133.6	GB47675
253	rna252	411665	Genbank:XM_006558586.3	GB47675
254	rna253	411665	Genbank:XM_016912197.2	GB47675
255	rna254	102655805	Genbank:XR_407947.3)
256	rna255	102655775	Genbank:XR_003305999.1)
257	rna256	102655747	Genbank:XR_407945.3)
258	rna257	102655720	Genbank:XR_001702958.2)
259	rna258	102655652	Genbank:XR_003305988.1)
260	rna259	102655652	Genbank:XR_001702946.2)
261	rna260	102655652	Genbank:XR_407941.3)
262	rna261	100578187	Genbank:XR_001702932.2)
263	rna262	102656449	Genbank:XR_003305896.1)
264	rna263	725041	Genbank:XM_001120937.5	GB47740
265	rna264	100578245	Genbank:XM_006558598.3	GB47670
266	rna265	100578245	Genbank:XM_006558597.3	GB47670
267	rna266	100578245	Genbank:XM_003249288.4	GB47670
268	rna267	100578245	Genbank:XM_006558596.3	GB47670
269	rna268	409852	Genbank:XM_393342.7	GB47669
270	rna269	107966075
271	rna270	102656644	Genbank:XR_003304345.1)
272	rna271	102656644	Genbank:XR_003304344.1)
273	rna272	102656644	Genbank:XR_003304339.1)
274	rna273	102654804	Genbank:XM_006558622.3)
275	rna274	413835	Genbank:XR_001706444.2	GB47741
276	rna275	413835	Genbank:XR_001706445.2	GB47741
277	rna276	413835	Genbank:XM_397274.7	GB47741
278	rna277	413835	Genbank:XM_003249289.4	GB47741
279	rna278	413835	Genbank:XR_001706446.2	GB47741
280	rna279	413835	Genbank:XM_006558601.3	GB47741
281	rna280	413834	Genbank:XM_016917618.2	GB47743
282	rna281	413834	Genbank:XM_026446280.1	GB47743
283	rna282	413834	Genbank:XM_006558603.3	GB47743
284	rna283	413834	Genbank:XM_397273.7	GB47743
285	rna284	113219407	Genbank:XM_026446281.1)
286	rna285	409999	Genbank:XM_006558606.3	GB47668
287	rna286	409999	Genbank:XM_393487.7	GB47668
288	rna287	727331	Genbank:XM_026446282.1	GB47744
289	rna288	412118	Genbank:XM_395584.7	GB47667
290	rna289	726902	Genbank:XM_001121025.5	GB47745
291	rna290	552064	Genbank:XM_624443.4	GB47746
292	rna291	552064	Genbank:XM_006558608.3	GB47746
293	rna292	409479	Genbank:XM_006558609.2	GB47747
294	rna293	413609	Genbank:NM_001214904.1	GB47748
295	rna294	413609	Genbank:XM_026440906.1	GB47748
296	rna295	413609	Genbank:XM_026440876.1	GB47748
297	rna296	552163	Genbank:XM_006558610.3	GB47666
298	rna297	552163	Genbank:XM_016917865.2	GB47666
299	rna298	552163	Genbank:XM_016917864.2	GB47666
300	rna299	727019	Genbank:XM_006558611.3	GB47663
301	rna300	100578696	Genbank:XM_006558613.3	GB47749
302	rna301	100578696	Genbank:XM_016917798.2	GB47749
303	rna302	412925	Genbank:XM_396376.7	GB47662
304	rna303	411675	Genbank:XM_395143.7	GB47751
305	rna304	411675	Genbank:XM_016917921.2	GB47751
306	rna305	411808	Genbank:XM_006558616.3	GB47661
307	rna306	725638	Genbank:XM_001121467.5	GB50350
308	rna307	724901	Genbank:XM_006559838.3	GB50348
309	rna308	724901	Genbank:XM_001119959.5	GB50348
310	rna309	551574	Genbank:XM_006559839.3	GB50347
311	rna310	551574	Genbank:XM_026442212.1	GB50347
312	rna311	412610	Genbank:XM_026442190.1	GB50352
313	rna312	412610	Genbank:XM_026442197.1	GB50352
314	rna313	413784	Genbank:XM_026445497.1	GB50353
315	rna314	102655618	Genbank:XM_026445525.1)
316	rna315	412473	Genbank:XM_395930.6	GB50355
317	rna316	550706	Genbank:XM_006559845.3	GB50345
318	rna317	550706	Genbank:XM_006559844.3	GB50345
319	rna318	550706	Genbank:XM_006559842.3	GB50345
320	rna319	550706	Genbank:XM_006559843.3	GB50345
321	rna320	725378	Genbank:XM_003249533.3	GB14943
322	rna321	727422	Genbank:XM_026442619.1	GB50344
323	rna322	727422	Genbank:XM_026442641.1	GB50344
324	rna323	727422	Genbank:NM_001242556.1	GB50344
325	rna324	725884	Genbank:XM_001120364.5	GB50356
326	rna325	113219419	RFAM:RF00535	Genbank:XR_003306548.1)
327	rna326	550716	Genbank:XM_623108.6	GB50357
328	rna327	727419	Genbank:XM_001123127.5	GB50343
329	rna328	408624	Genbank:XM_006559846.3	GB50359
330	rna329	408624	Genbank:XM_006559848.3	GB50359
331	rna330	408624	Genbank:XM_392165.7	GB50359
332	rna331	408624	Genbank:XM_006559849.2	GB50359
333	rna332	408624	Genbank:XM_006559847.3	GB50359
334	rna333	551279	Genbank:XM_006559851.3	GB50360
335	rna334	724238	Genbank:XM_016911229.2	GB50342
336	rna335	724238	Genbank:XM_006559854.3	GB50342
337	rna336	724238	Genbank:XM_016911215.2	GB50342
338	rna337	724238	Genbank:XM_016911217.2	GB50342
339	rna338	724238	Genbank:XM_016911237.2	GB50342
340	rna339	107964165	Genbank:XR_001702381.2)
341	rna340	100576540	Genbank:XM_006559852.3	GB50363
342	rna341	102655654	Genbank:XM_026446260.1)
343	rna342	724331	Genbank:XM_026446324.1	GB50364
344	rna343	551450	Genbank:XM_026446328.1	GB50366
345	rna344	100578309	Genbank:XM_026446326.1	GB50339
346	rna345	100578309	Genbank:XM_026446325.1	GB50339
347	rna346	100578309	Genbank:XM_016917825.2	GB50339
348	rna347	552162	Genbank:XM_016917824.2	GB50338
349	rna348	726235	Genbank:XM_026444278.1	GB50367
350	rna349	412000	Genbank:XM_006559860.3	GB50337
351	rna350	412000	Genbank:XM_016917922.2	GB50337
352	rna351	726291	Genbank:XM_006559861.3	GB50369
353	rna352	726291	Genbank:XM_001122042.5	GB50369
354	rna353	726291	Genbank:XM_006559863.3	GB50369
355	rna354	100578472	Genbank:XM_003249530.4	GB50336
356	rna355	726316	Genbank:XM_001122063.4	GB50335
357	rna356	411985	Genbank:XM_395451.7	GB50370
358	rna357	412578	Genbank:XM_006559864.3	GB50371
359	rna358	412578	Genbank:XM_016917816.2	GB50371
360	rna359	102655778	Genbank:XM_016917815.2)
361	rna360	725647	Genbank:XM_001120419.5	GB50333
362	rna361	412834	Genbank:XM_006559866.3	GB50372
363	rna362	412834	Genbank:XM_006559865.3	GB50372
364	rna363	412834	Genbank:XM_396286.7	GB50372
365	rna364	412834	Genbank:XM_016917857.1	GB50372
366	rna365	408623	Genbank:XM_026444332.1	GB50373
367	rna366	408623	Genbank:XM_026444329.1	GB50373
368	rna367	408623	Genbank:XM_026444339.1	GB50373
369	rna368	408623	Genbank:XM_026444337.1	GB50373
370	rna369	408623	Genbank:XM_026444360.1	GB50373
371	rna370	408623	Genbank:XM_026444355.1	GB50373
372	rna371	408623	Genbank:XM_026444340.1	GB50373
373	rna372	408623	Genbank:XM_026444349.1	GB50373
374	rna373	408623	Genbank:XM_026444358.1	GB50373
375	rna374	408623	Genbank:XM_026444350.1	GB50373
376	rna375	408623	Genbank:XM_026444370.1	GB50373
377	rna376	408623	Genbank:XM_026444362.1	GB50373
378	rna377	408623	Genbank:XM_026444334.1	GB50373
379	rna378	410761	Genbank:XM_026443780.1	GB50332
380	rna379	410761	Genbank:XM_026443778.1	GB50332
381	rna380	113219103	Genbank:XM_026443787.1)
382	rna381	100576147	Genbank:XM_006559882.3	GB50374
383	rna382	724992	Genbank:XM_006559884.3	GB50375
384	rna383	410758	Genbank:XM_026439028.1	GB48026
385	rna384	410758	Genbank:XM_026438982.1	GB48026
386	rna385	410758	Genbank:XM_026439001.1	GB48026
387	rna386	410758	Genbank:XM_026439016.1	GB48026
388	rna387	410758	Genbank:XM_026439022.1	GB48026
389	rna388	410758	Genbank:XM_026439025.1	GB48026
390	rna389	410758	Genbank:XM_026439026.1	GB48026
391	rna390	410758	Genbank:XM_026439004.1	GB48026
392	rna391	410758	Genbank:XM_026439000.1	GB48026
393	rna392	410758	Genbank:XM_026439013.1	GB48026
394	rna393	410758	Genbank:XM_016913949.2	GB48026
395	rna394	410758	Genbank:XM_026438998.1	GB48026
396	rna395	410758	Genbank:XM_026438987.1	GB48026
397	rna396	410758	Genbank:XM_026439010.1	GB48026
398	rna397	410757	Genbank:XM_394233.7	GB48028
399	rna398	410757	Genbank:XM_026443444.1	GB48028
400	rna399	408622	Genbank:XM_623297.6	GB48022
401	rna400	408622	Genbank:XM_006560256.3	GB48022
402	rna401	725922	Genbank:XM_001121709.5	GB48029
403	rna402	411968	Genbank:XM_026441732.1	GB48030
404	rna403	102654966	Genbank:XR_408682.3)
405	rna404	102654966	Genbank:XR_001706452.2)
406	rna405	725982	Genbank:XR_001703847.2	GB48031
407	rna406	725982	Genbank:XM_001121762.5	GB48031
408	rna407	726015	Genbank:XM_016913395.2	GB48032
409	rna408	726015	Genbank:XM_016913396.2	GB48032
410	rna409	727399	Genbank:XM_026444000.1	GB48034
411	rna410	727399	Genbank:XM_026444001.1	GB48034
412	rna411	727399	Genbank:XM_026443993.1	GB48034
413	rna412	727399	Genbank:XM_026443997.1	GB48034
414	rna413	727399	Genbank:XM_026443999.1	GB48034
415	rna414	727399	Genbank:XM_026443995.1	GB48034
416	rna415	113219421	RFAM:RF00003	Genbank:XR_003306550.1)
417	rna416	102655185	Genbank:XM_026443986.1)
418	rna417	102655185	Genbank:XM_026443980.1)
419	rna418	102655185	Genbank:XM_026443978.1)
420	rna419	102655185	Genbank:XM_006560262.3)
421	rna420	113219135	Genbank:XR_003305793.1)
422	rna421	102655581	Genbank:XR_003305792.1)
423	rna422	107965102	Genbank:XM_016914585.2)
424	rna423	726810	Genbank:XM_026442847.1	GB48037
425	rna424	726810	Genbank:XM_026442853.1	GB48037
426	rna425	100578752	Genbank:XM_003249619.4	GB48018
427	rna426	552366	Genbank:XM_016917958.2	GB48038
428	rna427	412017	Genbank:XM_006560271.3	GB48039
429	rna428	412017	Genbank:XM_026443482.1	GB48039
430	rna429	412016	Genbank:XM_395482.7	GB48017
431	rna430	113218608	Genbank:XR_003304214.1)
432	rna431	409780	Genbank:XM_026439104.1	GB49723
433	rna432	409780	Genbank:XM_026439138.1	GB49723
434	rna433	409780	Genbank:XM_026439115.1	GB49723
435	rna434	409780	Genbank:XM_026439114.1	GB49723
436	rna435	409780	Genbank:XM_026439112.1	GB49723
437	rna436	409780	Genbank:XM_026439193.1	GB49723
438	rna437	409780	Genbank:XM_026439163.1	GB49723
439	rna438	409780	Genbank:XM_026439129.1	GB49723
440	rna439	409780	Genbank:XM_026439119.1	GB49723
441	rna440	409780	Genbank:XM_026439126.1	GB49723
442	rna441	409780	Genbank:XM_026439121.1	GB49723
443	rna442	409780	Genbank:XM_026439100.1	GB49723
444	rna443	409780	Genbank:XM_026439134.1	GB49723
445	rna444	409780	Genbank:XM_026439144.1	GB49723
446	rna445	409780	Genbank:XM_026439136.1	GB49723
447	rna446	409780	Genbank:XM_026439159.1	GB49723
448	rna447	409780	Genbank:XM_026439125.1	GB49723
449	rna448	409780	Genbank:XM_026439173.1	GB49723
450	rna449	409780	Genbank:XM_026439155.1	GB49723
451	rna450	409780	Genbank:XM_026439128.1	GB49723
452	rna451	409780	Genbank:XM_026439182.1	GB49723
453	rna452	409780	Genbank:XM_026439177.1	GB49723
454	rna453	409780	Genbank:XM_026439170.1	GB49723
455	rna454	409780	Genbank:XM_026439162.1	GB49723
456	rna455	409780	Genbank:XM_026439148.1	GB49723
457	rna456	409780	Genbank:XM_026439141.1	GB49723
458	rna457	409780	Genbank:XM_026439190.1	GB49723
459	rna458	102656720	Genbank:XR_001702295.2)
460	rna459	102656720	Genbank:XR_003304210.1)
461	rna460	102656333	Genbank:XR_408870.3)
462	rna461	100577895	Genbank:XM_026446261.1	GB52267
463	rna462	100578042	Genbank:XR_003306099.1)
464	rna463	100578042	Genbank:XM_026445217.1)
465	rna464	408618	Genbank:XM_026442677.1	GB52266
466	rna465	408618	Genbank:XM_026442676.1	GB52266
467	rna466	102654856	Genbank:XR_003305305.1)
468	rna467	102655012	Genbank:XR_409142.3)
469	rna468	102656903	Genbank:XR_003305308.1)
470	rna469	102656828	Genbank:XR_003305303.1)
471	rna470	102656828	Genbank:XR_003305304.1)
472	rna471	107965033	Genbank:XR_001704391.2)
473	rna472	107965033	Genbank:XR_003305306.1)
474	rna473	113218984	Genbank:XR_003305307.1)
475	rna474	724233	Genbank:XM_006561912.3	GB53219
476	rna475	408619	Genbank:XM_006561913.3	GB53220
477	rna476	408619	Genbank:XM_392160.6	GB53220
478	rna477	408619	Genbank:XM_026445754.1	GB53220
479	rna478	408620	Genbank:XR_409249.3	GB53208
480	rna479	408620	Genbank:XM_392161.7	GB53208
481	rna480	102653658	Genbank:XM_006561914.3)
482	rna481	408621	Genbank:XM_392162.7	GB53222
483	rna482	102653893	Genbank:XM_006561917.3)
484	rna483	412319	Genbank:XM_395780.7	GB53223
485	rna484	412319	Genbank:XM_006561916.3	GB53223
486	rna485	412319	Genbank:XM_006561915.3	GB53223
487	rna486	412319	Genbank:XM_026442581.1	GB53223
488	rna487	113218842	Genbank:XR_003304851.1)
489	rna488	724535	Genbank:XM_026441250.1	GB53206
490	rna489	724535	Genbank:XM_026441248.1	GB53206
491	rna490	724535	Genbank:XM_026441254.1	GB53206
492	rna491	724535	Genbank:XM_026441253.1	GB53206
493	rna492	724535	Genbank:XM_026441258.1	GB53206
494	rna493	724535	Genbank:XM_026441242.1	GB53206
495	rna494	724535	Genbank:XM_026441246.1	GB53206
496	rna495	724535	Genbank:XM_026441259.1	GB53206
497	rna496	102653954	Genbank:XM_016911157.2)
498	rna497	102653954	Genbank:XR_409251.3)
499	rna498	102653954	Genbank:XR_409250.3)
500	rna499	102653920	Genbank:XM_006561918.3)
501	rna500	107964158	Genbank:XR_001702356.2)
502	rna501	551321	Genbank:XM_623718.5	GB53201
503	rna502	724720	Genbank:XM_001120612.4	GB53228
504	rna503	102654159	Genbank:XM_026441279.1)
505	rna504	724795	Genbank:XM_001120697.5	GB53229
506	rna505	551388	Genbank:NM_001040264.1	GB53230
507	rna506	411799	Genbank:XM_395266.7	GB53199
508	rna507	414017	Genbank:XM_026441293.1	GB53231
509	rna508	414017	Genbank:XM_026441285.1	GB53231
510	rna509	414017	Genbank:XM_026441289.1	GB53231
511	rna510	552530	Genbank:XR_003305418.1	GB52140
512	rna511	552530	Genbank:XR_003305417.1	GB52140
513	rna512	552530	Genbank:XR_003305406.1	GB52140
514	rna513	552530	Genbank:XM_026443160.1	GB52140
515	rna514	552530	Genbank:XR_003305404.1	GB52140
516	rna515	552530	Genbank:XM_026443149.1	GB52140
517	rna516	552530	Genbank:XM_026443148.1	GB52140
518	rna517	552530	Genbank:XM_026443146.1	GB52140
519	rna518	552530	Genbank:XM_026443162.1	GB52140
520	rna519	552530	Genbank:XM_026443157.1	GB52140
521	rna520	100577342	Genbank:XM_006561922.3	GB53235
522	rna521	102654398	Genbank:XM_006561923.3)
523	rna522	413244	Genbank:XM_396690.7	GB53236
524	rna523	413244	Genbank:XM_006561924.3	GB53236
525	rna524	551531	Genbank:XM_026443501.1	GB53237
526	rna525	412107	Genbank:XM_395573.6	GB53196
527	rna526	726685	Genbank:XM_026446262.1	GB14946
528	rna527	100578513	Genbank:XM_003249940.4	GB53238
529	rna528	409290	Genbank:XM_006561926.2	GB53194
530	rna529	409290	Genbank:XM_016917948.2	GB53194
531	rna530	100577369	Genbank:XM_016917879.2	GB53239
532	rna531	100577369	Genbank:XM_003249936.4	GB53239
533	rna532	107966055	Genbank:XM_026445618.1)
534	rna533	551842	Genbank:XM_624227.6	GB53240
535	rna534	551842	Genbank:XR_003306171.1	GB53240
536	rna535	100577454	Genbank:XM_003249937.4	GB53192
537	rna536	551892	Genbank:XM_006561927.3	GB12942
538	rna537	551892	Genbank:XM_624278.6	GB12942
539	rna538	551892	Genbank:XM_006561928.3	GB12942
540	rna539	551909	Genbank:XM_624294.6	GB53191
541	rna540	107963991	Genbank:XM_026445633.1)
542	rna541	107963991	Genbank:XM_026445632.1)
543	rna542	552083	Genbank:XM_624461.6	GB53190
544	rna543	409584	Genbank:XM_393087.7	GB53245
545	rna544	724578	Genbank:XM_026442151.1	GB53189
546	rna545	724578	Genbank:XM_026442152.1	GB53189
547	rna546	724578	Genbank:XM_026442156.1	GB53189
548	rna547	413437	Genbank:XM_396881.6	GB53246
549	rna548	414038	Genbank:XM_006561938.2	GB53188
550	rna549	414038	Genbank:XM_397474.6	GB53188
551	rna550	552602	Genbank:XM_006561937.3	GB53247
552	rna551	414037	Genbank:XM_006561930.3	GB53249
553	rna552	414037	Genbank:XM_397473.6	GB53249
554	rna553	414037	Genbank:XM_006561931.3	GB53249
555	rna554	414037	Genbank:XM_016917793.2	GB53249
556	rna555	414037	Genbank:XM_016917794.2	GB53249
557	rna556	414037	Genbank:XM_006561936.3	GB53249
558	rna557	414037	Genbank:XM_006561934.3	GB53249
559	rna558	414037	Genbank:XM_006561935.3	GB53249
560	rna559	552628	Genbank:XM_625002.6	GB53186
561	rna560	725317	Genbank:XM_001121177.5	GB53250
562	rna561	725317	Genbank:XM_006561940.3	GB53250
563	rna562	552648	Genbank:XM_006561939.3	GB53185
564	rna563	725418	Genbank:XM_001121269.5	GB53184
565	rna564	413950	Genbank:XM_006561941.3	GB53251
566	rna565	413950	Genbank:XM_006561942.3	GB53251
567	rna566	107963979	Genbank:XM_026442425.1)
568	rna567	102655724	Genbank:XR_409257.3)
569	rna568	102655724	Genbank:XR_409256.3)
570	rna569	725532	Genbank:XM_001121365.5	GB53253
571	rna570	725532	Genbank:XM_006561946.3	GB53253
572	rna571	725574	Genbank:XM_006561948.3	GB53183
573	rna572	100578104	Genbank:XR_003306334.1)
574	rna573	100578131	Genbank:XR_003305370.1)
575	rna574	552676	Genbank:XM_006561949.3	GB53256
576	rna575	552676	Genbank:XM_026441180.1	GB53256
577	rna576	412511	Genbank:XM_006561950.3	GB53180
578	rna577	100578247	Genbank:XM_026446263.1	GB53178
579	rna578	113218578	Genbank:XR_003306045.1)
580	rna579	725720	Genbank:XM_006561955.3	GB53257
581	rna580	725720	Genbank:XM_006561954.3	GB53257
582	rna581	102656395	Genbank:XM_006561956.3)
583	rna582	725745	Genbank:XM_001121554.5	GB53177
584	rna583	113219256	Genbank:XM_026445349.1)
585	rna584	725841	Genbank:XM_016917074.2	GB54847
586	rna585	725841	Genbank:XM_016917078.2	GB54847
587	rna586	725841	Genbank:XM_001121644.5	GB54847
588	rna587	725841	Genbank:XM_016917061.2	GB54847
589	rna588	412141	Genbank:XM_395605.6	GB54848
590	rna589	102656812	Genbank:XM_026438972.1)
591	rna590	102656812	Genbank:XM_006562508.3)
592	rna591	551819	Genbank:XM_624204.6	GB54845
593	rna592	727479	Genbank:XM_001123187.5	GB54851
594	rna593	727479	Genbank:XM_006562510.3	GB54851
595	rna594	727479	Genbank:XM_006562512.3	GB54851
596	rna595	727479	Genbank:XM_006562513.3	GB54851
597	rna596	727479	Genbank:XM_006562516.3	GB54851
598	rna597	727479	Genbank:XM_026438946.1	GB54851
599	rna598	727479	Genbank:XM_006562511.3	GB54851
600	rna599	727479	Genbank:XM_006562515.3	GB54851
601	rna600	413303	Genbank:XM_026441934.1	GB54852
602	rna601	413303	Genbank:XM_026441936.1	GB54852
603	rna602	413303	Genbank:XM_026441929.1	GB54852
604	rna603	413303	Genbank:XM_026441937.1	GB54852
605	rna604	551443	Genbank:XM_016917799.2	GB54844
606	rna605	551443	Genbank:XM_006562519.3	GB54844
607	rna606	551443	Genbank:XM_006562518.3	GB54844
608	rna607	551411	Genbank:XM_623804.6	GB54854
609	rna608	550789	Genbank:XM_623179.5	GB54855
610	rna609	725816	Genbank:XM_003250068.4)
611	rna610	412282	Genbank:XM_395743.7	GB54843
612	rna611	412282	Genbank:XM_006562520.3	GB54843
613	rna612	550903	Genbank:XM_623298.6	GB54842
614	rna613	408616	Genbank:XM_006562525.3	GB54841
615	rna614	408616	Genbank:XM_026446055.1	GB54841
616	rna615	408616	Genbank:XM_026446053.1	GB54841
617	rna616	408616	Genbank:XM_006562527.3	GB54841
618	rna617	408616	Genbank:XM_016913824.2	GB54841
619	rna618	408616	Genbank:XM_016913819.2	GB54841
620	rna619	408616	Genbank:XM_026446054.1	GB54841
621	rna620	408616	Genbank:XM_016913826.2	GB54841
622	rna621	408616	Genbank:XM_006562524.3	GB54841
623	rna622	408616	Genbank:XM_006562529.3	GB54841
624	rna623	408616	Genbank:XM_392157.6	GB54841
625	rna624	408616	Genbank:XM_006562526.3	GB54841
626	rna625	408616	Genbank:XM_006562523.3	GB54841
627	rna626	102654549	Genbank:XR_409477.3)
628	rna627	102654478	Genbank:XR_409475.3)
629	rna628	102654454	Genbank:XR_001704122.2)
630	rna629	113219397	Genbank:XR_003306501.1)
631	rna630	102654413	Genbank:XR_409472.3)
632	rna631	102654358	Genbank:XR_001704121.2)
633	rna632	102654358	Genbank:XR_001704120.2)
634	rna633	102654358	Genbank:XR_409469.3)
635	rna634	100577822	Genbank:XR_003306495.1)
636	rna635	100577822	Genbank:XR_003306496.1)
637	rna636	100577822	Genbank:XR_003306494.1)
638	rna637	100577822	Genbank:XR_003306500.1)
639	rna638	100577822	Genbank:XR_003306497.1)
640	rna639	100577822	Genbank:XR_003306493.1)
641	rna640	100577822	Genbank:XR_003306498.1)
642	rna641	100577822	Genbank:XR_003306499.1)
643	rna642	100577822	Genbank:XR_409462.3)
644	rna643	100577822	Genbank:XR_409463.3)
645	rna644	102654894	Genbank:XM_026446056.1)
646	rna645	113218819	Genbank:XR_003304786.1)
647	rna646	410754	Genbank:XM_006562539.3	GB54838
648	rna647	410754	Genbank:XM_006562538.3	GB54838
649	rna648	551383	Genbank:XM_623778.6	GB54837
650	rna649	552743	Genbank:XM_625118.6	GB15798
651	rna650	107965891	Genbank:XM_016917628.2)
652	rna651	409517	Genbank:XM_006562537.3	GB54861
653	rna652	412528	Genbank:XM_016914069.2	GB54835
654	rna653	412528	Genbank:XM_006562536.3	GB54835
655	rna654	412528	Genbank:XM_016914074.2	GB54835
656	rna655	412528	Genbank:XM_006562535.3	GB54835
657	rna656	412528	Genbank:XM_395983.7	GB54835
658	rna657	408615	Genbank:XM_392156.7	GB54831
659	rna658	551202	Genbank:XM_006562540.3	GB54830
660	rna659	410753	Genbank:XM_394229.6	GB54865
661	rna660	408614	Genbank:XM_016914059.2	GB54829
662	rna661	408614	Genbank:XM_392155.7	GB54829
663	rna662	100578445	Genbank:XM_026442974.1	GB54866
664	rna663	100578445	Genbank:XM_026442966.1	GB54866
665	rna664	100578445	Genbank:XM_026442970.1	GB54866
666	rna665	410752	Genbank:XM_006562544.3	GB54867
667	rna666	410752	Genbank:XM_016914045.2	GB54867
668	rna667	410752	Genbank:XM_006562547.3	GB54867
669	rna668	410752	Genbank:XM_016914051.2	GB54867
670	rna669	410751	Genbank:XM_394227.6	GB54868
671	rna670	408613	Genbank:XM_026439523.1	GB54827
672	rna671	408613	Genbank:XM_026439452.1	GB54827
673	rna672	408613	Genbank:XM_026439512.1	GB54827
674	rna673	408613	Genbank:XM_026439483.1	GB54827
675	rna674	408613	Genbank:NM_001145735.2	GB54827
676	rna675	107964984	Genbank:XR_001704253.2)
677	rna676	100577782	Genbank:XR_001706443.2	GB40936
678	rna677	100577782	Genbank:XR_003304162.1	GB40936
679	rna678	102655057	Genbank:XM_026442534.1)
680	rna679	412523	Genbank:XM_016917891.2	GB40938
681	rna680	726298	Genbank:XM_026441721.1	GB40963
682	rna681	726298	Genbank:XM_026441716.1	GB40963
683	rna682	726298	Genbank:XM_026441713.1	GB40963
684	rna683	726298	Genbank:XM_006562778.3	GB40963
685	rna684	113218896	Genbank:XR_003305010.1)
686	rna685	100577655	Genbank:XM_006562777.3)
687	rna686	102654581	Genbank:XR_001706473.2)
688	rna687	102654581	Genbank:XR_001706468.2)
689	rna688	102654581	Genbank:XR_409546.3)
690	rna689	102654581	Genbank:XR_001706471.2)
691	rna690	107966071	Genbank:XR_003306165.1)
692	rna691	413735	Genbank:XM_006562773.3	GB40955
693	rna692	413735	Genbank:XM_397174.7	GB40955
694	rna693	726221	Genbank:XM_001120404.5	GB40939
695	rna694	410043	Genbank:XM_393529.6	GB40941
696	rna695	410043	Genbank:XM_006562775.3	GB40941
697	rna696	409468	Genbank:XM_006562770.3	GB40944
698	rna697	409468	Genbank:XM_016916096.2	GB40944
699	rna698	409468	Genbank:XM_016916121.2	GB40944
700	rna699	409468	Genbank:XM_006562764.3	GB40944
701	rna700	409468	Genbank:XM_006562765.3	GB40944
702	rna701	409468	Genbank:XM_006562766.3	GB40944
703	rna702	409468	Genbank:XM_006562767.3	GB40944
704	rna703	409468	Genbank:XM_006562769.3	GB40944
705	rna704	409468	Genbank:XM_016916134.2	GB40944
706	rna705	409468	Genbank:XM_006562768.3	GB40944
707	rna706	409468	Genbank:XM_016916130.2	GB40944
708	rna707	409468	Genbank:XM_026446271.1	GB40944
709	rna708	409468	Genbank:XM_016916137.2	GB40944
710	rna709	102653866	Genbank:XR_003306538.1)
711	rna710	102653866	Genbank:XR_003306536.1)
712	rna711	102653866	Genbank:XR_003306537.1)
713	rna712	102653866	Genbank:XR_003306534.1)
714	rna713	102653866	Genbank:XR_003306533.1)
715	rna714	726449	Genbank:XM_006562763.3	GB40949
716	rna715	552636	Genbank:XM_006562758.3	GB40945
717	rna716	552636	Genbank:XM_026444380.1	GB40945
718	rna717	552636	Genbank:XM_026444383.1	GB40945
719	rna718	726088	Genbank:XM_001120202.5	GB40946
720	rna719	726088	Genbank:XM_006562757.3	GB40946
721	rna720	412397	Genbank:XM_006562755.3	GB40948
722	rna721	412397	Genbank:XM_006562756.3	GB40948
723	rna722	412397	Genbank:XM_623086.6	GB40948
724	rna723	412285	Genbank:NM_001145738.1	GB40867
725	rna724	412285	Genbank:XM_006563202.3	GB40867
726	rna725	412285	Genbank:XM_016911642.2	GB40867
727	rna726	412285	Genbank:XM_016911667.2	GB40867
728	rna727	100578115	Genbank:XR_409676.3)
729	rna728	409417	Genbank:XM_392932.7	GB40711
730	rna729	409418	Genbank:NM_001160050.1	GB40866
731	rna730	727596	Genbank:XM_026446341.1	GB40712
732	rna731	727596	Genbank:XM_006563296.3	GB40712
733	rna732	409798	Genbank:NM_001011636.1	GB40713
734	rna733	724192	Genbank:XM_001119962.5	GB40864
735	rna734	100577977	Genbank:XR_003306123.1)
736	rna735	100577977	Genbank:XR_003306122.1)
737	rna736	100577977	Genbank:XM_026445343.1)
738	rna737	100577977	Genbank:XM_016912812.2)
739	rna738	107964644	Genbank:XR_001703523.2)
740	rna739	102656214	Genbank:XR_001703514.2)
741	rna740	410034	Genbank:XM_026445345.1	GB40716
742	rna741	724280	Genbank:XM_001120086.4	GB40862
743	rna742	410033	Genbank:XM_026440705.1	GB40717
744	rna743	410033	Genbank:XM_006563288.3	GB40717
745	rna744	724327	Genbank:XM_001120148.5	GB40861
746	rna745	724327	Genbank:XM_006563289.2	GB40861
747	rna746	724327	Genbank:XM_006563290.3	GB40861
748	rna747	410032	Genbank:NM_001178025.1	GB40718
749	rna748	410032	Genbank:NM_001178026.1	GB40718
750	rna749	410032	Genbank:XM_006563201.3	GB40718
751	rna750	102655811	Genbank:XM_016912778.2)
752	rna751	102655811	Genbank:XM_006563287.3)
753	rna752	413693	Genbank:XM_026446264.1)
754	rna753	100576321	Genbank:XM_026439503.1	GB40859
755	rna754	100576321	Genbank:XM_026439504.1	GB40859
756	rna755	411794	Genbank:XM_006563283.2	GB40720
757	rna756	412190	Genbank:XM_395653.6	GB40858
758	rna757	102655540	Genbank:XM_006563281.3)
759	rna758	412189	Genbank:XM_395652.7	GB19920
760	rna759	409383	Genbank:XM_026444867.1	GB40857
761	rna760	409383	Genbank:XM_026444811.1	GB40857
762	rna761	409383	Genbank:XM_026444850.1	GB40857
763	rna762	409383	Genbank:XM_006563274.3	GB40857
764	rna763	409383	Genbank:XM_026444887.1	GB40857
765	rna764	409383	Genbank:XM_026444920.1	GB40857
766	rna765	409383	Genbank:XM_026444939.1	GB40857
767	rna766	102655045	Genbank:XR_409655.3)
768	rna767	100628994	Genbank:NR_039431.1	miRBase:MI0016139)
769	rna768	100628994	miRBase:MIMAT0018509	miRBase:MI0016139)
770	rna769	107964624	Genbank:XR_001703477.2)
771	rna770	113219263	Genbank:XR_003306144.1)
772	rna771	102655229	Genbank:XM_026445150.1)
773	rna772	102655229	Genbank:XR_003306089.1)
774	rna773	102655229	Genbank:XR_003306083.1)
775	rna774	102655229	Genbank:XR_409664.3)
776	rna775	107964619	Genbank:XR_001703466.2)
777	rna776	102655391	Genbank:XM_026444966.1)
778	rna777	102655431	Genbank:XR_001703451.2)
779	rna778	102655431	Genbank:XR_003306121.1)
780	rna779	102655431	Genbank:XR_003306113.1)
781	rna780	551556	Genbank:XM_026445023.1	GB40848
782	rna781	409053	Genbank:XM_016912667.2	GB40845
783	rna782	409053	Genbank:XM_016912668.2	GB40845
784	rna783	409053	Genbank:XM_016912670.2	GB40845
785	rna784	409053	Genbank:XM_397542.7	GB40845
786	rna785	409053	Genbank:XM_006563272.3	GB40845
787	rna786	409053	Genbank:XM_016912672.2	GB40845
788	rna787	411408	Genbank:XM_394882.7	GB40727
789	rna788	411408	Genbank:XM_026445103.1	GB40727
790	rna789	107964618	Genbank:XR_001703465.2)
791	rna790	411407	Genbank:XM_394881.7	GB40843
792	rna791	411406	Genbank:XM_394880.6	GB40728
793	rna792	411406	Genbank:XM_003250183.4	GB40728
794	rna793	107964596	Genbank:XR_001703407.2)
795	rna794	100576547	Genbank:XM_026441998.1	GB40842
796	rna795	100576547	Genbank:XM_026442002.1	GB40842
797	rna796	100576547	Genbank:XM_003250181.4	GB40842
798	rna797	100576547	Genbank:XM_026442010.1	GB40842
799	rna798	100576547	Genbank:XM_006563268.3	GB40842
800	rna799	100576547	Genbank:XM_016912637.2	GB40842
801	rna800	100576547	Genbank:XM_016912640.2	GB40842
802	rna801	107964593	Genbank:XR_003305083.1)
803	rna802	107964593	Genbank:XR_001703380.2)
804	rna803	107964593	Genbank:XR_003305084.1)
805	rna804	411405	Genbank:XM_026441997.1	GB40839
806	rna805	411405	Genbank:XM_026441987.1	GB40839
807	rna806	413346	Genbank:XM_396791.5	GB40838
808	rna807	551761	Genbank:XM_624148.6	GB40837
809	rna808	100576126	Genbank:XM_026442131.1	GB40836
810	rna809	113219420	RFAM:RF00003	Genbank:XR_003306549.1)
811	rna810	725384	Genbank:XM_006563204.3	GB40730
812	rna811	725384	Genbank:NM_001134943.1	GB40730
813	rna812	725345	Genbank:XM_006563261.3	GB40731
814	rna813	406080	Genbank:XM_026439185.1	GB40732
815	rna814	406080	Genbank:NM_001134940.1	GB40732
816	rna815	100188973	Genbank:NM_001134942.1	GB40733
817	rna816	725419	Genbank:XM_026441687.1	GB40833
818	rna817	725419	Genbank:XM_026441688.1	GB40833
819	rna818	725419	Genbank:XM_001121270.5	GB40833
820	rna819	725419	Genbank:XM_026441681.1	GB40833
821	rna820	725455	Genbank:XM_026444929.1	GB40734
822	rna821	550785	Genbank:XM_623339.6	GB40735
823	rna822	550785	Genbank:XM_006563260.2	GB40735
824	rna823	102653822	Genbank:XR_001703303.2)
825	rna824	102653822	Genbank:XR_409652.3)
826	rna825	100576291	Genbank:XM_026439889.1	GB40740
827	rna826	100576291	Genbank:XM_026439890.1	GB40740
828	rna827	100576291	Genbank:XM_026439887.1	GB40740
829	rna828	100576291	Genbank:XM_026439875.1	GB40740
830	rna829	100576291	Genbank:XM_026439892.1	GB40740
831	rna830	100576291	Genbank:XM_026439894.1	GB40740
832	rna831	100576291	Genbank:XM_026439880.1	GB40740
833	rna832	100576291	Genbank:XM_026439891.1	GB40740
834	rna833	100576291	Genbank:XM_016912484.2	GB40740
835	rna834	100576291	Genbank:XM_016912486.2	GB40740
836	rna835	100578458	Genbank:XR_003304493.1)
837	rna836	100578458	Genbank:XR_003304502.1)
838	rna837	100578458	Genbank:XR_003304497.1)
839	rna838	100578458	Genbank:XR_003304495.1)
840	rna839	102656923	Genbank:XR_409647.3)
841	rna840	411600	Genbank:XM_006563258.3	GB40741
842	rna841	725606	Genbank:XM_006563255.3	GB40831
843	rna842	725606	Genbank:XM_026439970.1	GB40831
844	rna843	725606	Genbank:XM_026439974.1	GB40831
845	rna844	113218708	Genbank:XR_003304492.1)
846	rna845	410749	Genbank:XM_394225.7	GB40744
847	rna846	725682	Genbank:XM_026439982.1	GB40830
848	rna847	725682	Genbank:XM_006563254.3	GB40830
849	rna848	725682	Genbank:XM_001121499.5	GB40830
850	rna849	725682	Genbank:XM_016912543.2	GB40830
851	rna850	100578378	Genbank:XR_120124.4)
852	rna851	725746	Genbank:XM_006563253.3	GB40828
853	rna852	552038	Genbank:XM_624418.6	GB40745
854	rna853	412287	Genbank:XM_006563252.3	GB40746
855	rna854	412287	Genbank:XM_395748.7	GB40746
856	rna855	412287	Genbank:XM_016912534.2	GB40746
857	rna856	552316	Genbank:XM_624691.6	GB40747
858	rna857	552294	Genbank:XM_006563251.2	GB40824
859	rna858	552294	Genbank:XM_016912531.1	GB40824
860	rna859	552294	Genbank:XM_016912526.2	GB40824
861	rna860	552294	Genbank:XM_624670.6	GB40824
862	rna861	411372	Genbank:XM_394846.6	GB40748
863	rna862	725920	Genbank:XM_026439867.1	GB40823
864	rna863	725945	Genbank:XM_026446265.1	GB40749
865	rna864	552206	Genbank:XM_026446133.1	GB40750
866	rna865	552206	Genbank:XM_026446132.1	GB40750
867	rna866	552187	Genbank:XM_006563246.3	GB40751
868	rna867	113219400	Genbank:XR_003306515.1)
869	rna868	102655490	Genbank:XR_003304808.1)
870	rna869	102655490	Genbank:XR_003304809.1)
871	rna870	100578285	Genbank:XR_120122.4)
872	rna871	113219388	Genbank:XR_003306471.1)
873	rna872	100577585	Genbank:XM_003250185.4	GB40821
874	rna873	409807	Genbank:XM_016911875.2	GB40754
875	rna874	409807	Genbank:XM_016911869.2	GB40754
876	rna875	409807	Genbank:XM_026446016.1	GB40754
877	rna876	409807	Genbank:XM_026446015.1	GB40754
878	rna877	100578978	Genbank:XM_026446017.1	GB52562
879	rna878	107964341	Genbank:XR_003306472.1)
880	rna879	107964341	Genbank:XR_001702809.2)
881	rna880	100579018	Genbank:XM_016911899.2	GB40819
882	rna881	726119	Genbank:XM_016911857.2	GB40818
883	rna882	726119	Genbank:XM_016911850.2	GB40818
884	rna883	726119	Genbank:XM_016911847.2	GB40818
885	rna884	726119	Genbank:XM_026446011.1	GB40818
886	rna885	726119	Genbank:XM_026446012.1	GB40818
887	rna886	726119	Genbank:XM_026446013.1	GB40818
888	rna887	113219389	Genbank:XR_003306474.1)
889	rna888	113219389	Genbank:XR_003306473.1)
890	rna889	107964337	Genbank:XR_001702807.2)
891	rna890	503505	Genbank:XM_006563203.3	GB40758
892	rna891	503505	Genbank:NM_001012429.1	GB40758
893	rna892	107964344	Genbank:XR_003306476.1)
894	rna893	102656044	Genbank:XR_409641.3)
895	rna894	113219390	Genbank:XR_003306475.1)
896	rna895	113219391	Genbank:XR_003306477.1)
897	rna896	552117	Genbank:XM_624497.5	GB40760
898	rna897	412103	Genbank:XM_026440100.1	GB40816
899	rna898	412103	Genbank:XM_026440099.1	GB40816
900	rna899	412103	Genbank:XM_026440101.1	GB40816
901	rna900	412103	Genbank:XM_026440097.1	GB40816
902	rna901	412103	Genbank:XM_026440096.1	GB40816
903	rna902	100576164	Genbank:XR_409612.3	GB40761
904	rna903	100576139	Genbank:XR_120118.4)
905	rna904	100576139	Genbank:XR_001704182.2)
906	rna905	414021	Genbank:XM_026445921.1	GB40764
907	rna906	414021	Genbank:XM_006563243.3	GB40764
908	rna907	414021	Genbank:XM_026445912.1	GB40764
909	rna908	414021	Genbank:XM_006563239.3	GB40764
910	rna909	414021	Genbank:XM_006563240.3	GB40764
911	rna910	414021	Genbank:XM_016913868.2	GB40764
912	rna911	414021	Genbank:XM_026445884.1	GB40764
913	rna912	414021	Genbank:XM_026445894.1	GB40764
914	rna913	414021	Genbank:XM_026445906.1	GB40764
915	rna914	414021	Genbank:XM_026445899.1	GB40764
916	rna915	414021	Genbank:XM_026445916.1	GB40764
917	rna916	414021	Genbank:XM_026445924.1	GB40764
918	rna917	414021	Genbank:XM_016913893.2	GB40764
919	rna918	102654917	Genbank:XR_412473.3)
920	rna919	100579059	Genbank:XR_003306343.1)
921	rna920	100579059	Genbank:XR_003306348.1)
922	rna921	100579059	Genbank:XR_003306344.1)
923	rna922	100579059	Genbank:XR_003306346.1)
924	rna923	100579059	Genbank:XR_003306341.1)
925	rna924	100579059	Genbank:XR_001704162.2)
926	rna925	100579059	Genbank:XR_003306345.1)
927	rna926	100579059	Genbank:XR_003306349.1)
928	rna927	100579059	Genbank:XR_003306347.1)
929	rna928	100579059	Genbank:XR_003306342.1)
930	rna929	102654976	Genbank:XR_409617.3)
931	rna930	113219329	Genbank:XM_026445926.1)
932	rna931	102655032	Genbank:XR_003306351.1)
933	rna932	102655032	Genbank:XR_003306358.1)
934	rna933	102655032	Genbank:XR_003306356.1)
935	rna934	102655032	Genbank:XR_003306350.1)
936	rna935	113219344	Genbank:XR_003306374.1)
937	rna936	102655155	Genbank:XR_409626.3)
938	rna937	414022	Genbank:XM_006563235.3	GB40765
939	rna938	414022	Genbank:XM_006563236.3	GB40765
940	rna939	725040	Genbank:XM_006563238.3	GB40810
941	rna940	410070	Genbank:XM_026439522.1	GB40766
942	rna941	410071	Genbank:XM_393558.7	GB40767
943	rna942	413803	Genbank:XM_016911804.2	GB40809
944	rna943	413803	Genbank:XM_026440997.1	GB40809
945	rna944	413803	Genbank:XM_016911842.2	GB40809
946	rna945	413803	Genbank:NM_001305884.1	GB40809
947	rna946	113218825	Genbank:XM_026441166.1)
948	rna947	113218825	Genbank:XM_026441163.1)
949	rna948	100577039	Genbank:XM_026441156.1)
950	rna949	100577039	Genbank:XM_026441158.1)
951	rna950	412458	Genbank:XM_026443298.1	GB40769
952	rna951	724721	Genbank:XM_001120613.5	GB40770
953	rna952	412829	Genbank:XM_006563227.3	GB40771
954	rna953	412829	Genbank:XM_396281.7	GB40771
955	rna954	412829	Genbank:XM_016913321.2	GB40771
956	rna955	724634	Genbank:XM_026446009.1	GB40808
957	rna956	724634	Genbank:XM_026446007.1	GB40808
958	rna957	724634	Genbank:XM_026446008.1	GB40808
959	rna958	724634	Genbank:XM_026446005.1	GB40808
960	rna959	724634	Genbank:XM_026446006.1	GB40808
961	rna960	724634	Genbank:XR_003306470.1	GB40808
962	rna961	724634	Genbank:XM_026446003.1	GB40808
963	rna962	724634	Genbank:XM_026446004.1	GB40808
964	rna963	409360	Genbank:XM_623093.6	GB40773
965	rna964	409360	Genbank:XM_016913299.2	GB40773
966	rna965	409360	Genbank:XM_016913285.2	GB40773
967	rna966	409360	Genbank:XM_016913284.2	GB40773
968	rna967	409360	Genbank:XM_006563225.3	GB40773
969	rna968	724585	Genbank:XM_001120482.5	GB40807
970	rna969	724536	Genbank:XM_001120425.5)
971	rna970	409520	Genbank:XM_016913302.1	GB40805
972	rna971	409520	Genbank:XM_006563222.3	GB40805
973	rna972	409520	Genbank:XM_393026.7	GB40805
974	rna973	412546	Genbank:XM_026446266.1	GB40774
975	rna974	724455	Genbank:XM_026441480.1	GB40804
976	rna975	724455	Genbank:XM_026441465.1	GB40804
977	rna976	724455	Genbank:XM_026441494.1	GB40804
978	rna977	724455	Genbank:XM_026441473.1	GB40804
979	rna978	724455	Genbank:XM_026441481.1	GB40804
980	rna979	724455	Genbank:XM_026441492.1	GB40804
981	rna980	724455	Genbank:XM_026441487.1	GB40804
982	rna981	724455	Genbank:XM_026441484.1	GB40804
983	rna982	724455	Genbank:XM_026441501.1	GB40804
984	rna983	724455	Genbank:XM_026441485.1	GB40804
985	rna984	724455	Genbank:XM_026441491.1	GB40804
986	rna985	412212	Genbank:XM_006563220.3	GB40775
987	rna986	107965181	Genbank:XM_026445359.1)
988	rna987	409527	Genbank:XM_016915602.2	GB40802
989	rna988	409527	Genbank:XM_016915604.2	GB40802
990	rna989	409527	Genbank:XM_393033.7	GB40802
991	rna990	413868	Genbank:XM_006563215.3	GB40777
992	rna991	551974	Genbank:XM_006563214.3	GB40801
993	rna992	551974	Genbank:XM_624357.5	GB40801
994	rna993	552001	Genbank:XM_624383.5	GB40778
995	rna994	102656856	Genbank:XR_409610.3)
996	rna995	413867	Genbank:XM_006563213.1	GB40779
997	rna996	552052	Genbank:XM_624431.5	GB40780
998	rna997	727074	Genbank:XM_001122788.5	GB40800
999	rna998	727079	Genbank:XM_001122793.5	GB40781
1000	rna999	100578907	Genbank:XM_003250195.4	GB40799
1001	rna1000	100578907	Genbank:XM_006563212.3	GB40799
1002	rna1001	727087	Genbank:XM_006563210.3	GB40798
1003	rna1002	727087	Genbank:XR_409609.3	GB40798
1004	rna1003	412480	Genbank:XM_395937.7	GB40782
1005	rna1004	727539	Genbank:XM_001123248.5)
1006	rna1005	727538	Genbank:XM_006563209.3	GB40797
1007	rna1006	727538	Genbank:XM_001123247.4	GB40797
1008	rna1007	724115	Genbank:XM_026444137.1	GB40796
1009	rna1008	724115	Genbank:XM_006563207.3	GB40796
1010	rna1009	724115	Genbank:XM_001119847.5	GB40796
1011	rna1010	724144	Genbank:XM_001119900.5	GB40795
1012	rna1011	551154	Genbank:XM_623549.6	GB40783
1013	rna1012	724234	Genbank:XM_026444283.1	GB40784
1014	rna1013	409957	Genbank:XR_003304637.1	GB40794
1015	rna1014	409957	Genbank:XM_393448.7	GB40794
1016	rna1015	724328	Genbank:XM_001120149.5	GB40785
1017	rna1016	100577254	Genbank:XM_026446083.1	GB51854
1018	rna1017	100577254	Genbank:XM_026446080.1	GB51854
1019	rna1018	100577254	Genbank:XM_026446087.1	GB51854
1020	rna1019	100577254	Genbank:XM_026446090.1	GB51854
1021	rna1020	100577254	Genbank:XM_026446091.1	GB51854
1022	rna1021	100577254	Genbank:XM_026446081.1	GB51854
1023	rna1022	100577254	Genbank:XM_026446089.1	GB51854
1024	rna1023	100577254	Genbank:XM_026446088.1	GB51854
1025	rna1024	100577254	Genbank:XM_026446095.1	GB51854
1026	rna1025	100577254	Genbank:XM_026446084.1	GB51854
1027	rna1026	100577254	Genbank:XM_026446086.1	GB51854
1028	rna1027	100577254	Genbank:XM_026446093.1	GB51854
1029	rna1028	100577254	Genbank:XM_026446096.1	GB51854
1030	rna1029	100577254	Genbank:XM_026446099.1	GB51854
1031	rna1030	100577254	Genbank:XM_026446082.1	GB51854
1032	rna1031	100577254	Genbank:XM_026446085.1	GB51854
1033	rna1032	100577254	Genbank:XM_026446092.1	GB51854
1034	rna1033	100577254	Genbank:XM_026446094.1	GB51854
1035	rna1034	100577254	Genbank:XM_026446098.1	GB51854
1036	rna1035	100577254	Genbank:XM_026446100.1	GB51854
1037	rna1036	100577254	Genbank:XM_026446097.1	GB51854
1038	rna1037	100577254	Genbank:XM_026446079.1	GB51854
1039	rna1038	100577254	Genbank:XM_026446077.1	GB51854
1040	rna1039	100577254	Genbank:XM_026446078.1	GB51854
1041	rna1040	100577254	Genbank:XM_016912447.2	GB51854
1042	rna1041	100577254	Genbank:XM_026446072.1	GB51854
1043	rna1042	100577254	Genbank:XM_026446073.1	GB51854
1044	rna1043	100577254	Genbank:XM_026446076.1	GB51854
1045	rna1044	100577254	Genbank:XM_026446075.1	GB51854
1046	rna1045	100577254	Genbank:XM_026446074.1	GB51854
1047	rna1046	100577254	Genbank:XM_006564975.3	GB51854
1048	rna1047	107965915	Genbank:XR_001706347.2)
1049	rna1048	102655946	Genbank:XR_409602.3)
1050	rna1049	102656017	Genbank:XR_003306503.1)
1051	rna1050	102656017	Genbank:XR_001706346.2)
1052	rna1051	100577291	Genbank:XR_001705731.2	GB51830
1053	rna1052	100577291	Genbank:XR_410091.3	GB51830
1054	rna1053	100577291	Genbank:XR_001705730.2	GB51830
1055	rna1054	100577291	Genbank:XR_003306117.1	GB51830
1056	rna1055	725775	Genbank:XM_006564977.3	GB51828
1057	rna1056	725775	Genbank:XM_006564976.3	GB51828
1058	rna1057	725775	Genbank:XM_026446466.1	GB51828
1059	rna1058	100577384	Genbank:XR_001705738.2)
1060	rna1059	100576726	Genbank:XR_001705725.2)
1061	rna1060	100576726	Genbank:XR_410093.3)
1062	rna1061	408611	Genbank:XM_016910826.2	GB51822
1063	rna1062	408611	Genbank:NM_001080205.1	GB51822
1064	rna1063	726243	Genbank:XM_006564988.3	GB51863
1065	rna1064	726243	Genbank:XM_006564986.3	GB51863
1066	rna1065	726243	Genbank:XM_006564987.3	GB51863
1067	rna1066	410743	Genbank:XM_394219.6	GB51820
1068	rna1067	410744	Genbank:XM_003250519.4	GB51819
1069	rna1068	113219271	Genbank:XR_003306160.1)
1070	rna1069	410745	Genbank:XM_394221.6	GB51818
1071	rna1070	410745	Genbank:XM_006564984.3	GB51818
1072	rna1071	410745	Genbank:XM_006564985.3	GB51818
1073	rna1072	552457	Genbank:XM_006564983.3	GB51817
1074	rna1073	410746	Genbank:XR_003306147.1	GB51816
1075	rna1074	410746	Genbank:XM_026445456.1	GB51816
1076	rna1075	552425	Genbank:XM_006564981.3	GB51815
1077	rna1076	552425	Genbank:XM_003250521.4	GB51815
1078	rna1077	410747	Genbank:XM_006564980.3	GB51814
1079	rna1078	410747	Genbank:XM_016914001.2	GB51814
1080	rna1079	410747	Genbank:XM_006564979.3	GB51814
1081	rna1080	552395	Genbank:XM_026445535.1	GB51813
1082	rna1081	410748	Genbank:XM_026445469.1	GB51812
1083	rna1082	410748	Genbank:XM_016913989.2	GB51812
1084	rna1083	410748	Genbank:XM_026445477.1	GB51812
1085	rna1084	410748	Genbank:XM_006564978.3	GB51812
1086	rna1085	410748	Genbank:XM_016913988.2	GB51812
1087	rna1086	113219272	Genbank:XR_003306161.1)
1088	rna1087	107964221	Genbank:XR_001702581.2)
1089	rna1088	550645	Genbank:XM_016911403.2	GB51807
1090	rna1089	550645	Genbank:XM_016911419.2	GB51807
1091	rna1090	550645	Genbank:XM_026439669.1	GB51807
1092	rna1091	550645	Genbank:XM_016911409.2	GB51807
1093	rna1092	550645	Genbank:XM_026439671.1	GB51807
1094	rna1093	550645	Genbank:XM_016911417.2	GB51807
1095	rna1094	550645	Genbank:XM_016911422.2	GB51807
1096	rna1095	550645	Genbank:XM_016911426.2	GB51807
1097	rna1096	550645	Genbank:XM_016911420.2	GB51807
1098	rna1097	550645	Genbank:XM_016911424.2	GB51807
1099	rna1098	550645	Genbank:XM_026439670.1	GB51807
1100	rna1099	102656636	Genbank:XR_410105.3)
1101	rna1100	107964213	Genbank:XM_016911438.2)
1102	rna1101	107964213	Genbank:XM_016911436.2)
1103	rna1102	408609	Genbank:XM_006564992.3	GB51806
1104	rna1103	408609	Genbank:XM_392150.6	GB51806
1105	rna1104	102656814	Genbank:XR_003304383.1)
1106	rna1105	102656814	Genbank:XR_003304382.1)
1107	rna1106	410741	Genbank:XM_394217.5	GB51805
1108	rna1107	410741	Genbank:XM_006564994.3	GB51805
1109	rna1108	102656788	Genbank:XR_410109.3)
1110	rna1109	100578082	Genbank:XR_003304386.1)
1111	rna1110	113218656	Genbank:XR_003304387.1)
1112	rna1111	551384	Genbank:XM_006564995.3	GB51866
1113	rna1112	551384	Genbank:XM_623779.5	GB51866
1114	rna1113	413813	Genbank:XM_397252.7	GB51867
1115	rna1114	551416	Genbank:XM_625247.6	GB51802
1116	rna1115	113219245	Genbank:XM_026445248.1)
1117	rna1116	113219245	Genbank:XM_026445247.1)
1118	rna1117	100577194	Genbank:XM_026445226.1	GB48976
1119	rna1118	100576961	Genbank:XM_006565280.3	GB48975
1120	rna1119	100576961	Genbank:XM_026440516.1	GB48975
1121	rna1120	100576961	Genbank:XM_016917904.2	GB48975
1122	rna1121	726412	Genbank:XM_016917903.2	GB48978
1123	rna1122	726412	Genbank:XM_006565282.3	GB48978
1124	rna1123	726412	Genbank:XM_006565281.3	GB48978
1125	rna1124	409749	Genbank:XM_006565283.3	GB48974
1126	rna1125	409749	Genbank:XM_393244.7	GB48974
1127	rna1126	413056	Genbank:XM_026446267.1	GB48980
1128	rna1127	726451	Genbank:XM_001122183.4	GB48981
1129	rna1128	413055	Genbank:XM_396506.7	GB48982
1130	rna1129	409748	Genbank:XM_026444323.1	GB48973
1131	rna1130	409748	Genbank:XM_026444299.1	GB48973
1132	rna1131	409748	Genbank:XM_026444205.1	GB48973
1133	rna1132	409748	Genbank:XM_026444168.1	GB48973
1134	rna1133	409748	Genbank:XM_026444266.1	GB48973
1135	rna1134	409748	Genbank:XM_016916411.2	GB48973
1136	rna1135	409748	Genbank:XM_016916410.2	GB48973
1137	rna1136	410740	Genbank:XM_006565295.3	GB48983
1138	rna1137	410740	Genbank:XM_394216.7	GB48983
1139	rna1138	410740	Genbank:XM_006565296.3	GB48983
1140	rna1139	410739	Genbank:XM_006565293.3	GB48972
1141	rna1140	410739	Genbank:XM_006565294.3	GB48972
1142	rna1141	410739	Genbank:XM_006565292.3	GB48972
1143	rna1142	410739	Genbank:XM_016910928.2	GB48972
1144	rna1143	410739	Genbank:XM_016910949.2	GB48972
1145	rna1144	113219185	Genbank:XM_026444616.1)
1146	rna1145	100629012	Genbank:NR_039463.1	miRBase:MI0016173)
1147	rna1146	100629012	miRBase:MIMAT0018543	miRBase:MI0016173)
1148	rna1147	726545	Genbank:XM_001122272.5	GB48986
1149	rna1148	726560	Genbank:XM_001122287.5	GB48987
1150	rna1149	726578	Genbank:XM_001122304.5	GB48988
1151	rna1150	726590	Genbank:XM_026446270.1	GB48991
1152	rna1151	408608	Genbank:XM_397512.5	GB48969
1153	rna1152	410736	Genbank:XM_016910982.2	GB48967
1154	rna1153	410736	Genbank:XM_016910975.2	GB48967
1155	rna1154	113218747	Genbank:XR_003304596.1)
1156	rna1155	726646	Genbank:XM_026440425.1	GB48993
1157	rna1156	413425	Genbank:XM_396869.7	GB48994
1158	rna1157	413425	Genbank:XM_026441958.1	GB48994
1159	rna1158	107964114	Genbank:XR_001702291.2)
1160	rna1159	102656327	Genbank:XR_410161.2)
1161	rna1160	102656327	Genbank:XR_003305774.1)
1162	rna1161	726676	Genbank:NM_001252430.1	GB48966
1163	rna1162	102656453	Genbank:XR_003305775.1)
1164	rna1163	102656426	Genbank:XR_001702282.2)
1165	rna1164	100577481	Genbank:XM_006565301.3	GB48996
1166	rna1165	100576770	Genbank:XM_006565299.3	GB48965
1167	rna1166	100576770	Genbank:XM_006565300.3	GB48965
1168	rna1167	100576770	Genbank:XM_003250567.4	GB48965
1169	rna1168	413754	Genbank:XM_026440364.1	GB16496
1170	rna1169	413754	Genbank:XM_026440381.1	GB16496
1171	rna1170	413754	Genbank:XM_026440390.1	GB16496
1172	rna1171	413754	Genbank:XM_026440374.1	GB16496
1173	rna1172	726729	Genbank:XM_001122450.5	GB48999
1174	rna1173	102656747	Genbank:XM_006565305.3)
1175	rna1174	102656747	Genbank:XM_026446247.1)
1176	rna1175	408604	Genbank:XM_016914689.2	GB49000
1177	rna1176	408604	Genbank:XM_016914695.2	GB49000
1178	rna1177	726742	Genbank:XM_001122463.5	GB48963
1179	rna1178	100577003	Genbank:XM_006565319.2	GB49001
1180	rna1179	100577003	Genbank:XM_003250569.4	GB49001
1181	rna1180	100577003	Genbank:XM_006565322.3	GB49001
1182	rna1181	100577003	Genbank:XM_006565320.2	GB49001
1183	rna1182	100577003	Genbank:XM_006565321.2	GB49001
1184	rna1183	102653957	Genbank:XM_026446028.1)
1185	rna1184	102653957	Genbank:XM_016914732.2)
1186	rna1185	100577082	Genbank:XM_006565311.3	GB49004
1187	rna1186	100577082	Genbank:XM_026446019.1	GB49004
1188	rna1187	100577082	Genbank:XM_026446021.1	GB49004
1189	rna1188	113218550	Genbank:XM_026446029.1)
1190	rna1189	100577113	Genbank:XM_026446023.1	GB48962
1191	rna1190	100577113	Genbank:XM_026446024.1	GB48962
1192	rna1191	100577113	Genbank:XM_026446025.1	GB48962
1193	rna1192	100577113	Genbank:XM_026446026.1	GB48962
1194	rna1193	551241	Genbank:XM_006565307.3	GB48961
1195	rna1194	409966	Genbank:XM_026446022.1	GB48960
1196	rna1195	409966	Genbank:XM_016914712.2	GB48960
1197	rna1196	409966	Genbank:XM_016914714.2	GB48960
1198	rna1197	113219392	Genbank:XR_003306478.1)
1199	rna1198	551318	Genbank:XM_625242.6	GB48958
1200	rna1199	408602	Genbank:XM_026444045.1	GB43015
1201	rna1200	408602	Genbank:XM_026444047.1	GB43015
1202	rna1201	408602	Genbank:XM_026444016.1	GB43015
1203	rna1202	408602	Genbank:XM_026444029.1	GB43015
1204	rna1203	408602	Genbank:XM_026444019.1	GB43015
1205	rna1204	408602	Genbank:XM_006567937.3	GB43015
1206	rna1205	408602	Genbank:XM_006567940.3	GB43015
1207	rna1206	408602	Genbank:XM_006567938.3	GB43015
1208	rna1207	408602	Genbank:XM_006567939.3	GB43015
1209	rna1208	107964879	Genbank:XR_001704036.2)
1210	rna1209	102653881	Genbank:XM_006567945.3)
1211	rna1210	410734	Genbank:XM_394210.7	GB43007
1212	rna1211	408603	Genbank:XM_392145.7	GB43006
1213	rna1212	410733	Genbank:XM_003251100.4	GB43005
1214	rna1213	410733	Genbank:XM_003251101.4	GB43005
1215	rna1214	410733	Genbank:XM_394209.7	GB43005
1216	rna1215	113219140	Genbank:XM_026444074.1)
1217	rna1216	408601	Genbank:XM_006567941.3	GB43016
1218	rna1217	410732	Genbank:XM_026443702.1	GB43004
1219	rna1218	410732	Genbank:XM_016914491.2	GB43004
1220	rna1219	410732	Genbank:XM_006567943.3	GB43004
1221	rna1220	113219088	Genbank:XR_003305620.1)
1222	rna1221	113219089	Genbank:XR_003305621.1)
1223	rna1222	113219090	Genbank:XR_003305622.1)
1224	rna1223	102653666	Genbank:XR_003305617.1)
1225	rna1224	102653639	Genbank:XR_001704578.2)
1226	rna1225	102653841	Genbank:XR_001704573.2)
1227	rna1226	102653841	Genbank:XR_003305619.1)
1228	rna1227	102656489	Genbank:XM_016917606.2)
1229	rna1228	102656489	Genbank:XR_001706312.2)
1230	rna1229	107966074	Genbank:XM_026446274.1)
1231	rna1230	412410	Genbank:XM_026443404.1	GB41024
1232	rna1231	412410	Genbank:XM_026443398.1	GB41024
1233	rna1232	412410	Genbank:XM_395867.7	GB41024
1234	rna1233	412410	Genbank:XM_006568140.3	GB41024
1235	rna1234	727267	Genbank:XM_006568141.3	GB41085
1236	rna1235	727267	Genbank:XM_001122977.5	GB41085
1237	rna1236	727263	Genbank:XM_001122973.4	GB41025
1238	rna1237	113219001	Genbank:XM_026442927.1)
1239	rna1238	725383	Genbank:XM_026442931.1	GB41084
1240	rna1239	551546	Genbank:XM_623939.6	GB41027
1241	rna1240	410157	Genbank:XM_006568137.3	GB41083
1242	rna1241	410157	Genbank:XM_003251140.4	GB41083
1243	rna1242	410157	Genbank:XM_006568138.3	GB41083
1244	rna1243	410157	Genbank:XM_393641.7	GB41083
1245	rna1244	410157	Genbank:XM_016917869.2	GB41083
1246	rna1245	410157	Genbank:XM_026443262.1	GB41083
1247	rna1246	410157	Genbank:XR_411126.3	GB41083
1248	rna1247	410157	Genbank:XM_026443265.1	GB41083
1249	rna1248	412588	Genbank:XM_016917712.2	GB41082
1250	rna1249	412588	Genbank:XM_016917710.2	GB41082
1251	rna1250	412588	Genbank:XM_006568135.3	GB41082
1252	rna1251	412588	Genbank:XM_006568132.3	GB41082
1253	rna1252	412588	Genbank:XM_006568130.3	GB41082
1254	rna1253	412588	Genbank:XM_016917722.2	GB41082
1255	rna1254	412588	Genbank:XM_006568131.3	GB41082
1256	rna1255	412588	Genbank:XM_396043.7	GB41082
1257	rna1256	412588	Genbank:XM_006568133.3	GB41082
1258	rna1257	411572	Genbank:XM_395043.7	GB41080
1259	rna1258	409113	Genbank:XM_006568129.2	GB41079
1260	rna1259	409113	Genbank:XM_006568128.2	GB41079
1261	rna1260	409114	Genbank:XM_392639.6	GB41028
1262	rna1261	411573	Genbank:XM_395044.7	GB41029
1263	rna1262	411573	Genbank:XM_006568124.3	GB41029
1264	rna1263	411573	Genbank:XM_006568126.3	GB41029
1265	rna1264	409340	Genbank:XM_623090.6	GB41030
1266	rna1265	409340	Genbank:XM_006568123.3	GB41030
1267	rna1266	727186	Genbank:XM_016915774.2	GB12898
1268	rna1267	727186	Genbank:XM_001122896.5	GB12898
1269	rna1268	102654365	Genbank:XM_026441345.1)
1270	rna1269	102654365	Genbank:XM_026441346.1)
1271	rna1270	102654365	Genbank:XM_026441350.1)
1272	rna1271	102654365	Genbank:XM_026441352.1)
1273	rna1272	726541	Genbank:XM_026439447.1	GB41075
1274	rna1273	726541	Genbank:XM_026439418.1	GB41075
1275	rna1274	726541	Genbank:XM_026439428.1	GB41075
1276	rna1275	726541	Genbank:XM_026439431.1	GB41075
1277	rna1276	726541	Genbank:XM_026439430.1	GB41075
1278	rna1277	726541	Genbank:XM_026439445.1	GB41075
1279	rna1278	726541	Genbank:XM_026439437.1	GB41075
1280	rna1279	726541	Genbank:XM_026439436.1	GB41075
1281	rna1280	726541	Genbank:XM_026439433.1	GB41075
1282	rna1281	726541	Genbank:XM_026439439.1	GB41075
1283	rna1282	726541	Genbank:XM_026439450.1	GB41075
1284	rna1283	412114	Genbank:XM_006568119.3	GB41032
1285	rna1284	726505	Genbank:XM_001122237.5	GB41033
1286	rna1285	409078	Genbank:XM_026438914.1	GB41074
1287	rna1286	409078	Genbank:XM_026438911.1	GB41074
1288	rna1287	409078	Genbank:XM_026438906.1	GB41074
1289	rna1288	551581	Genbank:XR_001706186.2	GB41073
1290	rna1289	551581	Genbank:XR_001706185.2	GB41073
1291	rna1290	551581	Genbank:XM_006568110.3	GB41073
1292	rna1291	551581	Genbank:XM_016917322.2	GB41073
1293	rna1292	551581	Genbank:XM_006568111.3	GB41073
1294	rna1293	551581	Genbank:XM_006568109.3	GB41073
1295	rna1294	551581	Genbank:XM_006568112.3	GB41073
1296	rna1295	413357	Genbank:XM_016917743.2	GB41035
1297	rna1296	413357	Genbank:XM_396802.7	GB41035
1298	rna1297	107963982	Genbank:XM_016917223.2)
1299	rna1298	107963982	Genbank:XM_016917234.2)
1300	rna1299	107963982	Genbank:XM_016917232.2)
1301	rna1300	107963982	Genbank:XM_016917239.2)
1302	rna1301	107963982	Genbank:XM_016917226.2)
1303	rna1302	107963982	Genbank:XM_016917228.2)
1304	rna1303	107963982	Genbank:XM_016917229.2)
1305	rna1304	100576288	Genbank:XR_411121.3)
1306	rna1305	100576288	Genbank:XM_006568108.3)
1307	rna1306	100576288	Genbank:XR_001706142.2)
1308	rna1307	100576288	Genbank:XR_411118.3)
1309	rna1308	100576288	Genbank:XR_411120.3)
1310	rna1309	100576288	Genbank:XR_411122.3)
1311	rna1310	100576288	Genbank:XR_411119.3)
1312	rna1311	100576288	Genbank:XR_001706160.2)
1313	rna1312	100576288	Genbank:XR_001706151.2)
1314	rna1313	100576288	Genbank:XR_001706145.2)
1315	rna1314	100576288	Genbank:XR_001706159.2)
1316	rna1315	100576288	Genbank:XR_001706150.2)
1317	rna1316	100576288	Genbank:XR_001706144.2)
1318	rna1317	100576288	Genbank:XR_001706149.2)
1319	rna1318	100576288	Genbank:XR_001706157.2)
1320	rna1319	100576288	Genbank:XR_003304219.1)
1321	rna1320	100576288	Genbank:XR_001706161.2)
1322	rna1321	100576288	Genbank:XR_003304220.1)
1323	rna1322	100576288	Genbank:XR_001706155.2)
1324	rna1323	100576288	Genbank:XR_001706148.2)
1325	rna1324	100576288	Genbank:XR_001706143.2)
1326	rna1325	100576288	Genbank:XR_001706146.2)
1327	rna1326	409927	Genbank:XM_006568107.3	GB41069
1328	rna1327	409927	Genbank:XM_393418.7	GB41069
1329	rna1328	409926	Genbank:XM_393417.6	GB41068
1330	rna1329	551728	Genbank:XM_006568106.3	GB41037
1331	rna1330	551728	Genbank:XM_624116.6	GB41037
1332	rna1331	409925	Genbank:XM_393416.7	GB41067
1333	rna1332	413471	Genbank:XM_396915.6	GB41038
1334	rna1333	413470	Genbank:XM_396914.7	GB41039
1335	rna1334	409924	Genbank:XM_016912131.2	GB41065
1336	rna1335	409924	Genbank:XM_006568105.3	GB41065
1337	rna1336	409924	Genbank:XM_016912134.2	GB41065
1338	rna1337	409924	Genbank:XM_016912133.2	GB41065
1339	rna1338	107966081
1340	rna1339	104794356	Genbank:NR_127340.1	miRBase:MI0020337)
1341	rna1340	104794356	miRBase:MIMAT0023690	miRBase:MI0020337)
1342	rna1341	413468	Genbank:XM_026444726.1	GB41063
1343	rna1342	413468	Genbank:XM_396912.7	GB41063
1344	rna1343	413468	Genbank:XM_006568096.3	GB41063
1345	rna1344	413468	Genbank:XM_006568094.3	GB41063
1346	rna1345	413467	Genbank:XM_003251133.4	GB41043
1347	rna1346	413467	Genbank:XM_016912146.2	GB41043
1348	rna1347	413467	Genbank:XM_006568098.3	GB41043
1349	rna1348	413467	Genbank:XM_006568099.3	GB41043
1350	rna1349	413467	Genbank:XM_006568100.3	GB41043
1351	rna1350	409606	Genbank:XM_393109.7	GB41045
1352	rna1351	409606	Genbank:XM_006568103.3	GB41045
1353	rna1352	409606	Genbank:XM_006568101.3	GB41045
1354	rna1353	409606	Genbank:XM_006568102.3	GB41045
1355	rna1354	409607	Genbank:XM_393110.7	GB41046
1356	rna1355	409608	Genbank:XM_026446245.1	GB41047
1357	rna1356	409608	Genbank:XM_026446246.1	GB41047
1358	rna1357	409608	Genbank:XM_026446244.1	GB41047
1359	rna1358	113218547	Genbank:XR_003306524.1)
1360	rna1359	100576445	Genbank:XR_003306526.1)
1361	rna1360	102655437	Genbank:XR_411095.3)
1362	rna1361	100578747	Genbank:XR_001704910.2	GB41058
1363	rna1362	102655493	Genbank:XM_026446275.1)
1364	rna1363	102655249	Genbank:XM_026446276.1)
1365	rna1364	102653825	Genbank:XR_003306525.1)
1366	rna1365	409701	Genbank:XM_006568491.3	GB46547
1367	rna1366	409701	Genbank:XM_393199.6	GB46547
1368	rna1367	113218996	Genbank:XR_003305348.1)
1369	rna1368	412813	Genbank:XM_016916998.2	GB44821
1370	rna1369	412813	Genbank:XM_026441042.1	GB44821
1371	rna1370	412813	Genbank:XM_016917010.2	GB44821
1372	rna1371	412813	Genbank:XM_026441055.1	GB44821
1373	rna1372	412813	Genbank:XM_026441059.1	GB44821
1374	rna1373	412813	Genbank:XM_016917021.2	GB44821
1375	rna1374	412813	Genbank:XM_026441067.1	GB44821
1376	rna1375	412813	Genbank:XM_016917025.2	GB44821
1377	rna1376	412813	Genbank:XM_016917027.2	GB44821
1378	rna1377	412813	Genbank:XM_016917039.2	GB44821
1379	rna1378	412813	Genbank:XM_016917015.2	GB44821
1380	rna1379	412813	Genbank:XM_026441085.1	GB44821
1381	rna1380	412813	Genbank:XM_026441086.1	GB44821
1382	rna1381	412813	Genbank:XM_016917032.2	GB44821
1383	rna1382	113218813	Genbank:XM_026441090.1)
1384	rna1383	409042	Genbank:NM_001143921.1	GB44824
1385	rna1384	409042	Genbank:XM_006568495.3	GB44824
1386	rna1385	409042	Genbank:XM_026439655.1	GB44824
1387	rna1386	102654114	Genbank:XM_026444662.1)
1388	rna1387	102654114	Genbank:XM_026444660.1)
1389	rna1388	408600	Genbank:XM_016914622.2	GB40868
1390	rna1389	725189	Genbank:XM_026446286.1	GB40871
1391	rna1390	725189	Genbank:XM_026446284.1	GB40871
1392	rna1391	725189	Genbank:XM_026446285.1	GB40871
1393	rna1392	725189	Genbank:XM_026446291.1	GB40871
1394	rna1393	725189	Genbank:XM_026446289.1	GB40871
1395	rna1394	725189	Genbank:XM_026446287.1	GB40871
1396	rna1395	725189	Genbank:XM_026446288.1	GB40871
1397	rna1396	725189	Genbank:XM_026446290.1	GB40871
1398	rna1397	107964080	Genbank:XR_003306539.1)
1399	rna1398	113219409	Genbank:XR_003306540.1)
1400	rna1399	408598	Genbank:XM_026446293.1	GB45852
1401	rna1400	408598	Genbank:XM_026446295.1	GB45852
1402	rna1401	408598	Genbank:XM_026446294.1	GB45852
1403	rna1402	408598	Genbank:XM_026446297.1	GB45852
1404	rna1403	102656618	Genbank:XM_026446292.1)
1405	rna1404	410730	Genbank:XM_006568544.3	GB45851
1406	rna1405	408597	Genbank:XM_392139.7	GB45854
1407	rna1406	408597	Genbank:XM_016917805.2	GB45854
1408	rna1407	408597	Genbank:XM_006568551.3	GB45854
1409	rna1408	410729	Genbank:XM_623673.6	GB45855
1410	rna1409	408596	Genbank:XM_392138.5	GB45850
1411	rna1410	408596	Genbank:XM_016917806.2	GB45850
1412	rna1411	100578424	Genbank:XM_006568555.3	GB45848
1413	rna1412	725576	Genbank:XM_006568552.3	GB45856
1414	rna1413	725576	Genbank:XM_006568554.3	GB45856
1415	rna1414	725576	Genbank:XM_006568553.3	GB45856
1416	rna1415	725576	Genbank:XM_001121399.5	GB45856
1417	rna1416	113219192	Genbank:XR_003305944.1)
1418	rna1417	552761	Genbank:XM_026444655.1	GB55046
1419	rna1418	552761	Genbank:XM_026444654.1	GB55046
1420	rna1419	113219191	Genbank:XR_003305943.1)
1421	rna1420	551385	Genbank:XM_026440863.1	GB45859
1422	rna1421	113219406	Genbank:XM_026446277.1)
1423	rna1422	725683	Genbank:XM_006568558.3	GB45860
1424	rna1423	725683	Genbank:XM_001121500.5	GB45860
1425	rna1424	725683	Genbank:XM_006568559.3	GB45860
1426	rna1425	100578568	Genbank:XR_001705551.2	GB45845
1427	rna1426	102654014	Genbank:XM_006568560.2)
1428	rna1427	725747	Genbank:XM_001121556.5	GB45843
1429	rna1428	725776	Genbank:XM_006568561.3	GB45841
1430	rna1429	725776	Genbank:XM_006568562.3	GB45841
1431	rna1430	551557	Genbank:XM_006568563.3	GB45838
1432	rna1431	113219418	Genbank:XM_026446339.1)
1433	rna1432	100578653	Genbank:XM_006568565.3	GB45862
1434	rna1433	100578653	Genbank:XM_006568566.3	GB45862
1435	rna1434	413713	Genbank:XM_006568568.3	GB45863
1436	rna1435	410115	Genbank:XM_393599.7	GB45864
1437	rna1436	410116	Genbank:XM_393600.7	GB45837
1438	rna1437	410116	Genbank:XM_006568573.3	GB45837
1439	rna1438	410116	Genbank:XM_006568572.3	GB45837
1440	rna1439	410116	Genbank:XM_006568574.3	GB45837
1441	rna1440	410116	Genbank:XM_026440686.1	GB45837
1442	rna1441	410116	Genbank:XM_026440685.1	GB45837
1443	rna1442	102654555	Genbank:XM_006568570.2)
1444	rna1443	102654555	Genbank:XM_006568571.2)
1445	rna1444	102654510	Genbank:XM_026440670.1	GB45836
1446	rna1445	102654510	Genbank:XM_026440674.1	GB45836
1447	rna1446	100578735	Genbank:XM_006568575.3	GB45834
1448	rna1447	413907	Genbank:XM_026443843.1	GB45833
1449	rna1448	413907	Genbank:XM_026443840.1	GB45833
1450	rna1449	413907	Genbank:XM_026443838.1	GB45833
1451	rna1450	107966050	Genbank:XM_026443851.1)
1452	rna1451	107966050	Genbank:XM_026443848.1)
1453	rna1452	409755	Genbank:XM_393249.7	GB45831
1454	rna1453	551939	Genbank:XM_624322.5	GB45866
1455	rna1454	724193	Genbank:XM_001119963.5	GB45830
1456	rna1455	413080	Genbank:XM_006568581.3	GB45867
1457	rna1456	413080	Genbank:XM_006568582.3	GB45867
1458	rna1457	409756	Genbank:XM_006568580.2	GB45829
1459	rna1458	409756	Genbank:XM_393250.7	GB45829
1460	rna1459	413081	Genbank:XM_006568577.3	GB45868
1461	rna1460	413081	Genbank:XM_006568578.3	GB45868
1462	rna1461	413081	Genbank:XM_006568579.3	GB45868
1463	rna1462	724329	Genbank:XM_006568583.3	GB45828
1464	rna1463	409757	Genbank:XM_006568589.3	GB45827
1465	rna1464	409757	Genbank:XM_006568587.3	GB45827
1466	rna1465	409757	Genbank:XM_006568586.3	GB45827
1467	rna1466	551818	Genbank:XM_624203.6	GB45870
1468	rna1467	551790	Genbank:XM_624175.5	GB45826
1469	rna1468	551790	Genbank:XM_006568590.2	GB45826
1470	rna1469	412164	Genbank:XM_006568591.3	GB45871
1471	rna1470	412164	Genbank:XM_395627.7	GB45871
1472	rna1471	724538	Genbank:XM_016917830.2	GB45825
1473	rna1472	100576871	Genbank:XM_006568593.3	GB45872
1474	rna1473	100576871	Genbank:XR_411252.3	GB45872
1475	rna1474	100576871	Genbank:XM_026444128.1	GB45872
1476	rna1475	409564	Genbank:XM_393070.7	GB45873
1477	rna1476	409564	Genbank:XM_006568597.2	GB45873
1478	rna1477	412674	Genbank:XM_026445321.1	GB45824
1479	rna1478	412674	Genbank:XM_006568595.3	GB45824
1480	rna1479	412674	Genbank:XM_006568594.3	GB45824
1481	rna1480	724760	Genbank:XM_001120657.5	GB45875
1482	rna1481	724760	Genbank:XM_006568598.3	GB45875
1483	rna1482	551620	Genbank:XM_016913186.2	GB45823
1484	rna1483	551620	Genbank:XM_624011.6	GB45823
1485	rna1484	552549	Genbank:XM_026443192.1	GB45876
1486	rna1485	552549	Genbank:XM_026443195.1	GB45876
1487	rna1486	552549	Genbank:XM_026443198.1	GB45876
1488	rna1487	724875	Genbank:XM_003251212.4	GB45822
1489	rna1488	412343	Genbank:XM_026443221.1	GB45877
1490	rna1489	412343	Genbank:XM_016913226.2	GB45877
1491	rna1490	412343	Genbank:XM_395804.6	GB45877
1492	rna1491	552502	Genbank:XM_006568601.3	GB45821
1493	rna1492	552502	Genbank:XM_006568600.3	GB45821
1494	rna1493	409102	Genbank:XM_623796.6	GB45878
1495	rna1494	409102	Genbank:XM_006568605.3	GB45878
1496	rna1495	409102	Genbank:XM_006568604.1	GB45878
1497	rna1496	409102	Genbank:XM_006568603.1	GB45878
1498	rna1497	409102	Genbank:XM_026443207.1	GB45878
1499	rna1498	409102	Genbank:XM_016913212.2	GB45878
1500	rna1499	102656283	Genbank:XM_006568606.3)
1501	rna1500	409103	Genbank:XM_006568602.2	GB45820
1502	rna1501	725105	Genbank:XM_026446131.1	GB45880
1503	rna1502	725105	Genbank:XR_003306514.1	GB45880
1504	rna1503	725105	Genbank:XM_026446129.1	GB45880
1505	rna1504	725105	Genbank:XM_006568616.3	GB45880
1506	rna1505	725105	Genbank:XM_026446130.1	GB45880
1507	rna1506	725150	Genbank:XM_006568615.3	GB45819
1508	rna1507	410061	Genbank:XM_016913778.1	GB45881
1509	rna1508	410061	Genbank:XM_026446127.1	GB45881
1510	rna1509	410061	Genbank:XM_006568607.3	GB45881
1511	rna1510	410061	Genbank:XM_026446126.1	GB45881
1512	rna1511	410061	Genbank:XM_026446128.1	GB45881
1513	rna1512	410061	Genbank:XM_026446124.1	GB45881
1514	rna1513	410061	Genbank:XM_016913791.2	GB45881
1515	rna1514	410061	Genbank:XM_026446123.1	GB45881
1516	rna1515	410061	Genbank:XM_006568612.3	GB45881
1517	rna1516	410061	Genbank:XM_026446125.1	GB45881
1518	rna1517	725237	Genbank:XM_001121110.5	GB45882
1519	rna1518	725279	Genbank:XM_001121147.5	GB45817
1520	rna1519	413759	Genbank:XM_026440143.1	GB45815
1521	rna1520	413759	Genbank:XM_026440136.1	GB45815
1522	rna1521	413759	Genbank:XM_026440134.1	GB45815
1523	rna1522	406118	Genbank:XM_026440147.1	GB16891
1524	rna1523	406118	Genbank:XM_026440154.1	GB16891
1525	rna1524	406118	Genbank:XM_026440153.1	GB16891
1526	rna1525	406118	Genbank:XM_026440159.1	GB16891
1527	rna1526	408592	Genbank:XM_006568626.3	GB45884
1528	rna1527	408592	Genbank:XM_006568627.3	GB45884
1529	rna1528	408592	Genbank:XM_006568625.3	GB45884
1530	rna1529	410726	Genbank:XM_006568623.3	GB45814
1531	rna1530	410726	Genbank:XM_006568624.3	GB45814
1532	rna1531	410726	Genbank:XM_016913096.2	GB45814
1533	rna1532	725494	Genbank:XM_001121331.5	GB45885
1534	rna1533	408594	Genbank:XM_016913042.2	GB45812
1535	rna1534	408594	Genbank:XM_006568630.3	GB45812
1536	rna1535	408594	Genbank:XM_006568628.3	GB45812
1537	rna1536	408594	Genbank:XM_006568629.3	GB45812
1538	rna1537	408594	Genbank:XM_006568632.3	GB45812
1539	rna1538	408594	Genbank:XR_001703674.2	GB45812
1540	rna1539	408594	Genbank:XR_001703673.2	GB45812
1541	rna1540	408594	Genbank:XM_026443082.1	GB45812
1542	rna1541	408594	Genbank:XM_006568634.3	GB45812
1543	rna1542	408594	Genbank:XM_006568633.3	GB45812
1544	rna1543	410727	Genbank:XM_006568639.3	GB45886
1545	rna1544	410727	Genbank:XM_394204.5	GB45886
1546	rna1545	725649	Genbank:XM_001121471.5)
1547	rna1546	408595	Genbank:XM_026443086.1	GB45810
1548	rna1547	408595	Genbank:XM_006568636.3	GB45810
1549	rna1548	408595	Genbank:XM_006568637.3	GB45810
1550	rna1549	107966049	Genbank:XR_003304998.1)
1551	rna1550	107966049	Genbank:XM_016917853.2)
1552	rna1551	107966049	Genbank:XM_016917851.1)
1553	rna1552	107966049	Genbank:XM_016917852.2)
1554	rna1553	100578300	Genbank:XM_026441669.1	GB45887
1555	rna1554	100578300	Genbank:XM_026441671.1	GB45887
1556	rna1555	100578300	Genbank:XM_006568646.3	GB45887
1557	rna1556	100578300	Genbank:XM_006568647.3	GB45887
1558	rna1557	410728	Genbank:XM_026441662.1	GB45809
1559	rna1558	410728	Genbank:XM_016917848.2	GB45809
1560	rna1559	410728	Genbank:XM_006568641.3	GB45809
1561	rna1560	410728	Genbank:XM_006568640.3	GB45809
1562	rna1561	410728	Genbank:XM_026441661.1	GB45809
1563	rna1562	413024	Genbank:XM_026441695.1	GB44810
1564	rna1563	413024	Genbank:XM_396475.7	GB44810
1565	rna1564	413024	Genbank:XM_026441692.1	GB44810
1566	rna1565	725817	Genbank:XM_001121619.5	GB44718
1567	rna1566	107964507	Genbank:XM_016912405.2)
1568	rna1567	413025	Genbank:XM_016912397.2	GB44808
1569	rna1568	413025	Genbank:XM_006569637.3	GB44808
1570	rna1569	102656318	Genbank:XR_411593.3)
1571	rna1570	107964511	Genbank:XR_003306078.1)
1572	rna1571	100578631	Genbank:XM_003251362.4	GB44804
1573	rna1572	100578631	Genbank:XM_006569636.3	GB44804
1574	rna1573	100578631	Genbank:XM_006569635.3	GB44804
1575	rna1574	100578631	Genbank:XM_006569634.3	GB44804
1576	rna1575	100578631	Genbank:XR_003306077.1	GB44804
1577	rna1576	552140	Genbank:XM_624519.5	GB44721
1578	rna1577	107964502	Genbank:XM_016912388.2)
1579	rna1578	552118	Genbank:XM_624498.6	GB44803
1580	rna1579	552118	Genbank:XM_006569632.2	GB44803
1581	rna1580	725848	Genbank:XM_006569633.3	GB44723
1582	rna1581	552094	Genbank:XM_006569622.3	GB44802
1583	rna1582	552094	Genbank:XM_006569623.3	GB44802
1584	rna1583	552094	Genbank:XM_006569621.3	GB44802
1585	rna1584	552094	Genbank:XM_006569629.3	GB44802
1586	rna1585	552094	Genbank:XM_016912368.2	GB44802
1587	rna1586	552094	Genbank:XM_006569626.3	GB44802
1588	rna1587	552094	Genbank:XM_006569625.3	GB44802
1589	rna1588	552094	Genbank:XM_006569628.3	GB44802
1590	rna1589	552094	Genbank:XM_006569630.3	GB44802
1591	rna1590	552094	Genbank:XM_006569631.3	GB44802
1592	rna1591	552094	Genbank:XM_016912375.2	GB44802
1593	rna1592	552094	Genbank:XM_006569627.3	GB44802
1594	rna1593	552094	Genbank:XM_006569624.3	GB44802
1595	rna1594	726014	Genbank:XR_411592.3	GB44800
1596	rna1595	726014	Genbank:XR_411591.3	GB44800
1597	rna1596	726014	Genbank:XM_006569620.3	GB44800
1598	rna1597	552067	Genbank:XM_625274.6	GB44725
1599	rna1598	552039	Genbank:XM_006569618.3	GB44799
1600	rna1599	726060	Genbank:XM_016915453.2	GB44726
1601	rna1600	410725	Genbank:XM_006569615.3	GB44798
1602	rna1601	410725	Genbank:XM_006569616.3	GB44798
1603	rna1602	410725	Genbank:XM_006569613.3	GB44798
1604	rna1603	410725	Genbank:XM_006569614.3	GB44798
1605	rna1604	410725	Genbank:XR_411589.2	GB44798
1606	rna1605	410724	Genbank:XM_006569605.3	GB44796
1607	rna1606	410724	Genbank:XM_006569606.3	GB44796
1608	rna1607	410724	Genbank:XM_006569611.3	GB44796
1609	rna1608	410724	Genbank:XM_026446342.1	GB44796
1610	rna1609	410724	Genbank:XM_006569607.3	GB44796
1611	rna1610	410724	Genbank:XM_006569610.3	GB44796
1612	rna1611	410724	Genbank:XM_394201.6	GB44796
1613	rna1612	100578016	Genbank:XR_411576.3)
1614	rna1613	100578016	Genbank:XR_120493.4)
1615	rna1614	100578016	Genbank:XR_001705583.2)
1616	rna1615	100578057	Genbank:XR_001705586.2)
1617	rna1616	100578133	Genbank:XM_006569612.3)
1618	rna1617	100578133	Genbank:XR_411584.2)
1619	rna1618	100578133	Genbank:XR_001705577.2)
1620	rna1619	100578133	Genbank:XR_411585.3)
1621	rna1620	100578133	Genbank:XR_003306546.1)
1622	rna1621	100578184	Genbank:XM_016916282.2)
1623	rna1622	100578184	Genbank:XM_016916284.2)
1624	rna1623	107965530	Genbank:XR_001705587.2)
1625	rna1624	100577891	Genbank:XR_001705584.2	GB44730
1626	rna1625	550948	Genbank:XM_006569604.3	GB44731
1627	rna1626	408591	Genbank:XM_006569601.3	GB44792
1628	rna1627	408591	Genbank:XM_392133.7	GB44792
1629	rna1628	408591	Genbank:XM_006569603.3	GB44792
1630	rna1629	408591	Genbank:XM_006569602.3	GB44792
1631	rna1630	408590	Genbank:XM_006569600.3	GB44732
1632	rna1631	408590	Genbank:XM_016917854.2	GB44732
1633	rna1632	408590	Genbank:XM_392132.7	GB44732
1634	rna1633	408590	Genbank:XM_006569599.3	GB44732
1635	rna1634	409733	Genbank:XM_006569590.3	GB44791
1636	rna1635	409733	Genbank:XM_393231.6	GB44791
1637	rna1636	409733	Genbank:XM_006569592.3	GB44791
1638	rna1637	409733	Genbank:XM_006569594.3	GB44791
1639	rna1638	409733	Genbank:XM_006569593.3	GB44791
1640	rna1639	100577336	Genbank:XR_001705688.2	GB44733
1641	rna1640	100577336	Genbank:XR_001705682.2	GB44733
1642	rna1641	100577336	Genbank:XR_003305551.1	GB44733
1643	rna1642	100577296	Genbank:XM_006569597.3	GB44734
1644	rna1643	100577296	Genbank:XM_003251370.4	GB44734
1645	rna1644	409734	Genbank:XM_393232.6	GB44789
1646	rna1645	409734	Genbank:XM_006569598.3	GB44789
1647	rna1646	100577140	Genbank:XM_006569589.3	GB44735
1648	rna1647	100577140	Genbank:XM_003251369.4	GB44735
1649	rna1648	552374	Genbank:XM_624748.5	GB44787
1650	rna1649	552374	Genbank:XM_006569586.3	GB44787
1651	rna1650	552374	Genbank:XM_016916853.1	GB44787
1652	rna1651	552374	Genbank:XM_026443566.1	GB44787
1653	rna1652	102656816	Genbank:XR_003305554.1)
1654	rna1653	102656816	Genbank:XR_001705785.2)
1655	rna1654	102653642	Genbank:XR_003305556.1)
1656	rna1655	102653642	Genbank:XR_001705792.2)
1657	rna1656	102653612	Genbank:XR_411565.3)
1658	rna1657	113219066	Genbank:XR_003305558.1)
1659	rna1658	102656752	Genbank:XR_003305878.1)
1660	rna1659	102656752	Genbank:XR_003305874.1)
1661	rna1660	412613	Genbank:XM_016917915.2	GB44786
1662	rna1661	409546	Genbank:XM_016917174.2	GB44739
1663	rna1662	409546	Genbank:XM_026439404.1	GB44739
1664	rna1663	102656558	Genbank:XR_411559.3)
1665	rna1664	551415	Genbank:XM_006569580.3	GB44783
1666	rna1665	551415	Genbank:XR_003304252.1	GB44783
1667	rna1666	551415	Genbank:XM_016917173.2	GB44783
1668	rna1667	551354	Genbank:XM_623751.5	GB44781
1669	rna1668	411965	Genbank:XM_006569578.3	GB44780
1670	rna1669	411965	Genbank:XM_016917941.1	GB44780
1671	rna1670	411965	Genbank:XM_006569579.3	GB44780
1672	rna1671	726223	Genbank:XM_026443912.1	GB44742
1673	rna1672	551573	Genbank:XM_026443947.1	GB44779
1674	rna1673	551573	Genbank:XM_006569576.3	GB44779
1675	rna1674	551573	Genbank:XM_006569575.3	GB44779
1676	rna1675	551573	Genbank:XM_006569574.3	GB44779
1677	rna1676	551612	Genbank:XM_624003.6	GB44743
1678	rna1677	551612	Genbank:XM_016917807.2	GB44743
1679	rna1678	725882	Genbank:XM_006569573.3	GB44777
1680	rna1679	725882	Genbank:XM_026441365.1	GB44777
1681	rna1680	725882	Genbank:XM_006569572.3	GB44777
1682	rna1681	551636	Genbank:XM_006569568.3	GB44776
1683	rna1682	551636	Genbank:XM_624027.6	GB44776
1684	rna1683	551636	Genbank:XM_006569567.3	GB44776
1685	rna1684	551670	Genbank:XM_006569564.3	GB44774
1686	rna1685	551670	Genbank:XM_624059.6	GB44774
1687	rna1686	725225	Genbank:XM_001121102.5	GB44744
1688	rna1687	409218	Genbank:XM_392742.7	GB44773
1689	rna1688	100576131	Genbank:XM_006569562.3	GB44745
1690	rna1689	412112	Genbank:XM_006569561.2	GB44746
1691	rna1690	412112	Genbank:XM_006569560.3	GB44746
1692	rna1691	100579052	Genbank:XM_003251365.3)
1693	rna1692	724620	Genbank:XM_026441370.1	GB44747
1694	rna1693	551107	Genbank:XM_623503.5	GB44749
1695	rna1694	726944	Genbank:XM_026446148.1	GB44751
1696	rna1695	726944	Genbank:XM_026446146.1	GB44751
1697	rna1696	726944	Genbank:XM_026446151.1	GB44751
1698	rna1697	726944	Genbank:XM_026446152.1	GB44751
1699	rna1698	726944	Genbank:XM_026446149.1	GB44751
1700	rna1699	726944	Genbank:XM_026446150.1	GB44751
1701	rna1700	411997	Genbank:XM_026446153.1	GB44772
1702	rna1701	411997	Genbank:XM_006569559.3	GB44772
1703	rna1702	411997	Genbank:XM_006569558.3	GB44772
1704	rna1703	552371	Genbank:XM_026446156.1	GB44771
1705	rna1704	552371	Genbank:XM_026446155.1	GB44771
1706	rna1705	552371	Genbank:XM_624745.6	GB44771
1707	rna1706	552371	Genbank:XM_026446154.1	GB44771
1708	rna1707	552371	Genbank:XM_026446157.1	GB44771
1709	rna1708	726918	Genbank:XM_016916234.2	GB44753
1710	rna1709	412748	Genbank:XM_026446158.1	GB44770
1711	rna1710	409079	Genbank:XM_392604.7	GB44755
1712	rna1711	727390	Genbank:XM_006569546.3	GB44756
1713	rna1712	727390	Genbank:XM_006569544.3	GB44756
1714	rna1713	727390	Genbank:XM_026444875.1	GB44756
1715	rna1714	727390	Genbank:XM_006569547.3	GB44756
1716	rna1715	727390	Genbank:XM_006569548.3	GB44756
1717	rna1716	412495	Genbank:XM_624085.6	GB44757
1718	rna1717	412495	Genbank:XM_006569543.3	GB44757
1719	rna1718	550977	Genbank:XM_623419.6	GB44768
1720	rna1719	550977	Genbank:XM_006569542.3	GB44768
1721	rna1720	550977	Genbank:XM_006569541.3	GB44768
1722	rna1721	550977	Genbank:XM_016917917.2	GB44768
1723	rna1722	727396	Genbank:XM_006569538.2	GB44758
1724	rna1723	727396	Genbank:XM_006569540.3	GB44758
1725	rna1724	102654495	Genbank:XM_026441919.1)
1726	rna1725	102654495	Genbank:XM_026441908.1)
1727	rna1726	100578820	Genbank:XM_026441901.1	GB44766
1728	rna1727	100578820	Genbank:XM_026441891.1	GB44766
1729	rna1728	100578820	Genbank:XM_026441882.1	GB44766
1730	rna1729	100578820	Genbank:XM_026441885.1	GB44766
1731	rna1730	100578820	Genbank:XM_026441883.1	GB44766
1732	rna1731	100578820	Genbank:XM_026441881.1	GB44766
1733	rna1732	412721	Genbank:XM_016917437.2	GB44759
1734	rna1733	412721	Genbank:XM_016917440.2	GB44759
1735	rna1734	412721	Genbank:XM_026443242.1	GB44759
1736	rna1735	724633	Genbank:XM_003251358.4)
1737	rna1736	724678	Genbank:XM_001119899.5)
1738	rna1737	552473	Genbank:XM_006569530.3	GB44761
1739	rna1738	552473	Genbank:XM_006569531.3	GB44761
1740	rna1739	552473	Genbank:XM_624846.6	GB44761
1741	rna1740	726264	Genbank:XM_006569528.3	GB44764
1742	rna1741	726264	Genbank:XM_006569529.3	GB44764
1743	rna1742	726264	Genbank:XM_001122019.5	GB44764
1744	rna1743	552497	Genbank:XM_026446058.1	GB44762
1745	rna1744	552497	Genbank:XM_026446059.1	GB44762
1746	rna1745	552497	Genbank:XM_026446057.1	GB44762
1747	rna1746	552497	Genbank:XM_026446060.1	GB44762
1748	rna1747	551976	Genbank:XM_016915682.2	GB46464
1749	rna1748	551976	Genbank:XM_026446061.1	GB46464
1750	rna1749	551976	Genbank:XM_026446063.1	GB46464
1751	rna1750	551976	Genbank:XM_026446062.1	GB46464
1752	rna1751	551976	Genbank:XM_026446064.1	GB46464
1753	rna1752	551976	Genbank:XM_016915683.2	GB46464
1754	rna1753	551785	Genbank:XM_624170.6	GB46462
1755	rna1754	412636	Genbank:XM_006569993.3	GB46465
1756	rna1755	412636	Genbank:XM_396091.7	GB46465
1757	rna1756	412636	Genbank:XM_006569992.3	GB46465
1758	rna1757	412636	Genbank:XM_006569991.3	GB46465
1759	rna1758	100578966	Genbank:XM_003251457.4	GB46461
1760	rna1759	100578479	Genbank:XM_026446067.1	GB46460
1761	rna1760	100578479	Genbank:XM_003251434.4	GB46460
1762	rna1761	726667	Genbank:XM_026446065.1	GB46466
1763	rna1762	726667	Genbank:XM_026446066.1	GB46466
1764	rna1763	409351	Genbank:XM_006569995.3	GB46459
1765	rna1764	409351	Genbank:XM_006569996.3	GB46459
1766	rna1765	726694	Genbank:XM_001122415.5	GB46467
1767	rna1766	726694	Genbank:XM_026443608.1	GB46467
1768	rna1767	100577197	Genbank:XM_026444429.1	GB46458
1769	rna1768	100577197	Genbank:XM_026444424.1	GB46458
1770	rna1769	100577197	Genbank:XM_026444413.1	GB46458
1771	rna1770	726722	Genbank:XM_026441539.1	GB46468
1772	rna1771	409860	Genbank:XM_393350.7	GB46457
1773	rna1772	409860	Genbank:XM_006570002.3	GB46457
1774	rna1773	409860	Genbank:XM_026441535.1	GB46457
1775	rna1774	100629014	Genbank:NR_039465.1	miRBase:MI0016175)
1776	rna1775	100629014	miRBase:MIMAT0018545	miRBase:MI0016175)
1777	rna1776	113219403	Genbank:XM_026446256.1)
1778	rna1777	726743	Genbank:XM_006570003.3	GB46472
1779	rna1778	113219232	Genbank:XR_003306060.1)
1780	rna1779	726779	Genbank:XM_026445249.1	GB46453
1781	rna1780	726779	Genbank:XM_006570004.3	GB46453
1782	rna1781	113219248	Genbank:XR_003306102.1)
1783	rna1782	113219247	Genbank:XR_003306101.1)
1784	rna1783	409859	Genbank:XM_393349.7	GB46452
1785	rna1784	409859	Genbank:XM_006570010.3	GB46452
1786	rna1785	411555	Genbank:XM_006570007.3	GB46450
1787	rna1786	411555	Genbank:XM_006570005.3	GB46450
1788	rna1787	411555	Genbank:XM_016915351.2	GB46450
1789	rna1788	411555	Genbank:XM_006570006.3	GB46450
1790	rna1789	411555	Genbank:XM_006570009.3	GB46450
1791	rna1790	107965313	Genbank:XM_026446300.1)
1792	rna1791	107965313	Genbank:XR_003306542.1)
1793	rna1792	107965313	Genbank:XR_003306541.1)
1794	rna1793	409100	Genbank:XM_392626.7	GB46476
1795	rna1794	726824	Genbank:XM_026446299.1	GB46477
1796	rna1795	551406	Genbank:XM_623800.6	GB46449
1797	rna1796	412224	Genbank:XM_395686.6	GB46478
1798	rna1797	412224	Genbank:XM_016915342.2	GB46478
1799	rna1798	412224	Genbank:XM_026444953.1	GB46478
1800	rna1799	409646	Genbank:XM_006570015.3	GB46448
1801	rna1800	409646	Genbank:XM_393144.7	GB46448
1802	rna1801	409646	Genbank:XM_006570016.3	GB46448
1803	rna1802	409646	Genbank:XM_006570013.3	GB46448
1804	rna1803	409646	Genbank:XM_016914659.2	GB46448
1805	rna1804	409646	Genbank:XM_006570014.3	GB46448
1806	rna1805	411526	Genbank:XM_026445000.1	GB46447
1807	rna1806	411526	Genbank:XM_006570025.3	GB46447
1808	rna1807	411526	Genbank:XM_006570024.3	GB46447
1809	rna1808	411526	Genbank:XM_394997.7	GB46447
1810	rna1809	411526	Genbank:XM_016914667.2	GB46447
1811	rna1810	411526	Genbank:XM_016914668.2	GB46447
1812	rna1811	409093	Genbank:XM_016914634.2	GB46479
1813	rna1812	409093	Genbank:XM_016914635.2	GB46479
1814	rna1813	409093	Genbank:XM_016914636.2	GB46479
1815	rna1814	409093	Genbank:XM_006570018.3	GB46479
1816	rna1815	409093	Genbank:XM_016914646.2	GB46479
1817	rna1816	409093	Genbank:XM_016914645.2	GB46479
1818	rna1817	409093	Genbank:XM_006570020.3	GB46479
1819	rna1818	409093	Genbank:XM_006570021.3	GB46479
1820	rna1819	409093	Genbank:XM_006570019.3	GB46479
1821	rna1820	409093	Genbank:XM_016914652.2	GB46479
1822	rna1821	409093	Genbank:XM_016914654.2	GB46479
1823	rna1822	409093	Genbank:XM_026444957.1	GB46479
1824	rna1823	113219225	Genbank:XM_026445009.1)
1825	rna1824	100577425	Genbank:XM_026444994.1	GB46480
1826	rna1825	409481	Genbank:XM_392990.7	GB46481
1827	rna1826	409481	Genbank:XM_003251455.4	GB46481
1828	rna1827	100578657	Genbank:XR_001703063.2)
1829	rna1828	100578657	Genbank:XR_001703069.2)
1830	rna1829	102655567	Genbank:XR_003305187.1)
1831	rna1830	102655567	Genbank:XR_003305185.1)
1832	rna1831	410035	Genbank:XM_393520.7	GB46487
1833	rna1832	410035	Genbank:XM_016912321.2	GB46487
1834	rna1833	410035	Genbank:XM_006570030.3	GB46487
1835	rna1834	410035	Genbank:XM_006570026.3	GB46487
1836	rna1835	410035	Genbank:XM_006570029.3	GB46487
1837	rna1836	410035	Genbank:XM_026442353.1	GB46487
1838	rna1837	410035	Genbank:XM_006570031.3	GB46487
1839	rna1838	410035	Genbank:XM_006570028.3	GB46487
1840	rna1839	102655515	Genbank:XR_001703079.2)
1841	rna1840	102655515	Genbank:XR_003305188.1)
1842	rna1841	102655515	Genbank:XR_001703080.2)
1843	rna1842	102655275	Genbank:XR_003305182.1)
1844	rna1843	102655275	Genbank:XR_001703074.2)
1845	rna1844	102655275	Genbank:XR_001703075.2)
1846	rna1845	102655275	Genbank:XR_001703070.2)
1847	rna1846	102655275	Genbank:XR_003305181.1)
1848	rna1847	107964488	Genbank:XR_001703089.2)
1849	rna1848	413678	Genbank:XM_016912305.2	GB46444
1850	rna1849	413678	Genbank:XM_016912298.2	GB46444
1851	rna1850	413678	Genbank:XM_016912301.2	GB46444
1852	rna1851	413677	Genbank:XM_006570033.3	GB46490
1853	rna1852	413677	Genbank:XM_397118.7	GB46490
1854	rna1853	413677	Genbank:XM_006570032.3	GB46490
1855	rna1854	413677	Genbank:XM_006570034.3	GB46490
1856	rna1855	413677	Genbank:XM_006570035.3	GB46490
1857	rna1856	413677	Genbank:XM_006570036.3	GB46490
1858	rna1857	413677	Genbank:XM_006570037.3	GB46490
1859	rna1858	413677	Genbank:XM_026442384.1	GB46490
1860	rna1859	413677	Genbank:XM_006570038.3	GB46490
1861	rna1860	102655933	Genbank:XR_411741.3)
1862	rna1861	551679	Genbank:XM_006570045.3	GB46443
1863	rna1862	551679	Genbank:XM_003251456.4	GB46443
1864	rna1863	551679	Genbank:XM_016917820.1	GB46443
1865	rna1864	551679	Genbank:XM_006570043.3	GB46443
1866	rna1865	409401	Genbank:XM_006570049.3	GB46492
1867	rna1866	409401	Genbank:XM_006570067.3	GB46492
1868	rna1867	409401	Genbank:XM_006570055.3	GB46492
1869	rna1868	409401	Genbank:XM_006570063.3	GB46492
1870	rna1869	409401	Genbank:XM_623389.6	GB46492
1871	rna1870	409401	Genbank:XM_006570047.3	GB46492
1872	rna1871	409401	Genbank:XM_016917817.2	GB46492
1873	rna1872	409401	Genbank:XM_016917819.2	GB46492
1874	rna1873	409401	Genbank:XM_006570050.3	GB46492
1875	rna1874	409401	Genbank:XM_026441579.1	GB46492
1876	rna1875	409401	Genbank:XM_006570064.3	GB46492
1877	rna1876	409401	Genbank:XM_016917818.2	GB46492
1878	rna1877	409401	Genbank:XM_006570058.3	GB46492
1879	rna1878	409401	Genbank:XM_623113.6	GB46492
1880	rna1879	409401	Genbank:XM_006570046.3	GB46492
1881	rna1880	409401	Genbank:XM_006570051.3	GB46492
1882	rna1881	409401	Genbank:XM_006570052.3	GB46492
1883	rna1882	409401	Genbank:XM_006570053.3	GB46492
1884	rna1883	409401	Genbank:XM_006570060.3	GB46492
1885	rna1884	409401	Genbank:XM_006570054.3	GB46492
1886	rna1885	409401	Genbank:XM_006570059.3	GB46492
1887	rna1886	409401	Genbank:XM_006570061.3	GB46492
1888	rna1887	409401	Genbank:XM_006570062.3	GB46492
1889	rna1888	409401	Genbank:XM_006570065.3	GB46492
1890	rna1889	409401	Genbank:XM_006570066.3	GB46492
1891	rna1890	409401	Genbank:XM_006570048.3	GB46492
1892	rna1891	551705	Genbank:XM_026444438.1	GB46493
1893	rna1892	551705	Genbank:XM_006570068.3	GB46493
1894	rna1893	551705	Genbank:XM_624094.6	GB46493
1895	rna1894	100577499	Genbank:XM_003251446.4	GB46441
1896	rna1895	409571	Genbank:XM_393076.7	GB46494
1897	rna1896	724719	Genbank:XM_006570069.2	GB46440
1898	rna1897	107966040	Genbank:XM_026441098.1)
1899	rna1898	100576106	Genbank:XM_003251458.4	GB46438
1900	rna1899	552440	Genbank:XM_624813.6	GB46437
1901	rna1900	726972	Genbank:XM_001122688.5)
1902	rna1901	726972	Genbank:XM_006570070.3)
1903	rna1902	107965622	Genbank:XR_001705753.2)
1904	rna1903	551730	Genbank:XM_624118.6	GB46495
1905	rna1904	724235	Genbank:XM_026446222.1	GB46496
1906	rna1905	724235	Genbank:XM_006570072.3	GB46496
1907	rna1906	724235	Genbank:XM_026446220.1	GB46496
1908	rna1907	724235	Genbank:XM_026446221.1	GB46496
1909	rna1908	724235	Genbank:XM_006570071.3	GB46496
1910	rna1909	724235	Genbank:XM_006570077.3	GB46496
1911	rna1910	724235	Genbank:XM_026446223.1	GB46496
1912	rna1911	724235	Genbank:XM_026446224.1	GB46496
1913	rna1912	724235	Genbank:XM_006570076.3	GB46496
1914	rna1913	724235	Genbank:XM_016915735.2	GB46496
1915	rna1914	414004	Genbank:XM_397439.7	GB46431
1916	rna1915	724330	Genbank:XM_001120151.3	GB46430
1917	rna1916	724495	Genbank:XM_026446020.1	GB46500
1918	rna1917	724495	Genbank:XM_026446018.1	GB46500
1919	rna1918	724495	Genbank:XM_026446032.1	GB46500
1920	rna1919	724495	Genbank:XM_026446027.1	GB46500
1921	rna1920	724495	Genbank:XM_006570080.3	GB46500
1922	rna1921	724495	Genbank:XM_006570081.3	GB46500
1923	rna1922	724495	Genbank:XM_026446010.1	GB46500
1924	rna1923	724495	Genbank:XM_026446014.1	GB46500
1925	rna1924	724495	Genbank:XM_026446030.1	GB46500
1926	rna1925	409109	Genbank:XM_026445876.1	GB46429
1927	rna1926	409109	Genbank:XM_016916658.2	GB46429
1928	rna1927	409109	Genbank:XM_026445922.1	GB46429
1929	rna1928	409096	Genbank:XM_397545.7	GB46427
1930	rna1929	107965607	Genbank:XR_001705703.2)
1931	rna1930	100578708	Genbank:XM_016917900.2	GB46426
1932	rna1931	100578708	Genbank:XM_016917901.2	GB46426
1933	rna1932	100578708	Genbank:XM_026444147.1	GB46426
1934	rna1933	100578708	Genbank:XM_016917902.2	GB46426
1935	rna1934	724635	Genbank:XM_001120526.5	GB46501
1936	rna1935	724680	Genbank:XM_026445859.1	GB46502
1937	rna1936	724680	Genbank:XM_006570089.3	GB46502
1938	rna1937	113219319	Genbank:XM_026445868.1)
1939	rna1938	551031	Genbank:XM_006570090.3	GB46425
1940	rna1939	551031	Genbank:XM_016913021.2	GB46425
1941	rna1940	409718	Genbank:XM_016913014.2	GB46423
1942	rna1941	409718	Genbank:XM_016913013.2	GB46423
1943	rna1942	409718	Genbank:XM_006570091.3	GB46423
1944	rna1943	409718	Genbank:XM_016913015.2	GB46423
1945	rna1944	724625	Genbank:XM_001119937.5	GB46503
1946	rna1945	413000	Genbank:XM_396451.7	GB46422
1947	rna1946	102655469	Genbank:XM_026445850.1)
1948	rna1947	102655422	Genbank:XM_026445848.1)
1949	rna1948	113219320	Genbank:XM_026445869.1)
1950	rna1949	552040	Genbank:XM_016912986.2	GB46507
1951	rna1950	552040	Genbank:XM_016912994.2	GB46507
1952	rna1951	552040	Genbank:XM_016912998.2	GB46507
1953	rna1952	552040	Genbank:XM_006570093.3	GB46507
1954	rna1953	552040	Genbank:XM_624420.6	GB46507
1955	rna1954	113218781	Genbank:XM_026440831.1)
1956	rna1955	409717	Genbank:XM_393215.7	GB46509
1957	rna1956	409717	Genbank:XM_006570107.3	GB46509
1958	rna1957	409717	Genbank:XM_006570105.3	GB46509
1959	rna1958	409717	Genbank:XM_006570103.3	GB46509
1960	rna1959	409717	Genbank:XM_006570102.3	GB46509
1961	rna1960	409717	Genbank:XM_006570100.3	GB46509
1962	rna1961	409717	Genbank:XM_006570108.3	GB46509
1963	rna1962	409717	Genbank:XM_016912953.2	GB46509
1964	rna1963	409717	Genbank:XM_006570101.3	GB46509
1965	rna1964	409717	Genbank:XM_006570106.3	GB46509
1966	rna1965	552095	Genbank:XM_624474.6	GB46510
1967	rna1966	409258	Genbank:XM_392780.7	GB46420
1968	rna1967	409259	Genbank:XM_397552.7	GB46511
1969	rna1968	409259	Genbank:XR_411753.3	GB46511
1970	rna1969	552166	Genbank:XM_624545.6	GB46512
1971	rna1970	410723	Genbank:XM_006570110.3	GB46419
1972	rna1971	102656191	Genbank:XR_001706450.2)
1973	rna1972	725190	Genbank:XM_026441938.1	GB46513
1974	rna1973	725190	Genbank:XM_001121064.5	GB46513
1975	rna1974	113218910	Genbank:XR_003305064.1)
1976	rna1975	113218632	Genbank:XR_003304346.1)
1977	rna1976	552229	Genbank:XM_016914831.2	GB46514
1978	rna1977	107965163	Genbank:XM_026444710.1)
1979	rna1978	100576446	Genbank:XM_006570114.3	GB46516
1980	rna1979	100576446	Genbank:XM_016914817.2	GB46516
1981	rna1980	100576446	Genbank:XM_006570113.3	GB46516
1982	rna1981	102656359	Genbank:XR_001704742.2)
1983	rna1982	102656491	Genbank:XM_006570115.3)
1984	rna1983	726920	Genbank:XM_006570116.3	GB46518
1985	rna1984	100576473	Genbank:XM_016914798.2	GB46417
1986	rna1985	100576473	Genbank:XM_003251438.4	GB46417
1987	rna1986	102656611	Genbank:XM_016914792.2)
1988	rna1987	102656640	Genbank:XM_006570118.3)
1989	rna1988	102656669	Genbank:XM_006570119.3)
1990	rna1989	102656669	Genbank:XM_006570120.3)
1991	rna1990	113219275	Genbank:XR_003306163.1)
1992	rna1991	102656732	Genbank:XM_006570121.3)
1993	rna1992	100576505	Genbank:XM_026441617.1	GB46412
1994	rna1993	100576505	Genbank:XM_016917844.2	GB46412
1995	rna1994	100576505	Genbank:XM_026441616.1	GB46412
1996	rna1995	100577918	Genbank:XM_006570122.3	GB46410
1997	rna1996	100577918	Genbank:XM_016915485.2	GB46410
1998	rna1997	100576730	Genbank:XM_003251441.4	GB46409
1999	rna1998	107965347	Genbank:XR_001705202.1)
[truncated: 26,356 more rows]
